# Supplementary material for: Preparation of pyrrolizinone derivatives via sequential transformations of cyclic allyl imides: synthesis of quinolactacide and marinamide
Source: Royal Society of Chemistry journal article supplement (doi:10.1039/c8ob00260f), 2018-01-01
Supplement: c8ob00260f1.pdf [file c8ob00260f1.pdf]

## Supplementary Information

---

### **Preparation of Pyrrolizinone Derivatives via Sequential Transformations of Cyclic Allyl Imides: Synthesis of Quinolactacide and Marinamide**

Milena Simic, Gordana Tasic, Predrag Jovanovic, Milos Petkovic and Vladimir Savic

*University of Belgrade, Faculty of Pharmacy, Department of Organic Chemistry,  
Vojvode Stepe 450, 11221 Belgrade, Serbia*

### **Contents**

|                                                                                |     |
|--------------------------------------------------------------------------------|-----|
| General information.....                                                       | S2  |
| General procedures for synthesis of <i>N</i> -allyl imides.....                | S2  |
| General procedure for synthesis of tertiary alcohols.....                      | S4  |
| General procedure for hydrolysis of pyrrolizinones.....                        | S11 |
| Derivatization of pyrrolizinones.....                                          | S12 |
| References.....                                                                | S14 |
| Copies of NMR spectra of synthesized pyrrolizinones and their derivatives..... | S15 |

## General informations

The NMR spectra were recorded on a Bruker Ascend 400 (400 MHz) spectrometer. Chemical shifts are given in parts per million ( $\delta$ ) downfield from tetramethylsilane as the internal standard. Deuteriochloroform was used as a solvent, unless otherwise stated. Mass spectral data were recorded using Agilent Technologies 6520 Q-TOF spectrometer coupled with Agilent 1200 HPLC or Agilent Technologies 5975C MS coupled with Agilent Technologies 6890N GC. IR spectra were recorded on a IR Termo Scientific NICOLET iS10 (4950) spectrometer. Melting points were determined using Boetius PHMK 05 apparatus without correction. Flash chromatography employed silica gel 60 (230-400 mesh) while thin layer chromatography was carried out using alumina plates with 0.25 mm silica layer (Kieselgel 60 F<sub>254</sub>, Merck). Compounds were visualized by staining with potassium permanganate solution. The solvents were purified by distillation before use.

## General procedures for synthesis of *N*-allyl imides

### Procedure A<sup>1</sup>

Anhydride (3 mmol) and allyl amine (513 mg, 9 mmol) were dissolved in toluene (40 mL) and triethylamine (30 mg, 0.3 mmol) was added. The resulting mixture was refluxed for 5-12 h. The solvent was then evaporated under reduced pressure, the solid residue was dissolved in ethyl acetate and washed with water (3 x 10 mL) and brine (2 x 5 mL). After drying over anhydrous Na<sub>2</sub>SO<sub>4</sub> and removal of the solvent under reduced pressure, the crude imide was purified by flash column chromatography (SiO<sub>2</sub>, petroleum ether-ether) to afford the product which was used in next step without further purification.

### Procedure B<sup>2</sup>

To a mixture of imide (3 mmol) and potassium carbonate (1.03 g, 7.5 mmol) in acetonitrile (7 mL) allylbromide (0.3 g, 2.5 mmol) was added at ambient temperature. The resulting mixture was stirred at reflux for 13h. After completion of the reaction, the mixture was filtered and the solvent was evaporated under reduced pressure. The crude mixture was purified by column chromatography (SiO<sub>2</sub>, petroleum ether-ether) to afford the product which was used in next step without further purification.

*6-Allyl-6H-pyrrolo[3,4-*b*]pyridine-5,7-dione* **12h**. The title compound prepared following procedure A was isolated (451 mg, 80%) as a white solid, Mp=107-108 °C. <sup>1</sup>H NMR (400 MHz, CDCl<sub>3</sub>)  $\delta$  8.98 (dd, *J* = 5.0, 1.5 Hz, 1H), 8.18 (dd, *J* = 7.6, 1.5 Hz, 1H), 7.63 (dd, *J* = 7.6, 5.0 Hz, 1H), 6.05 – 5.79 (m, 1H), 5.27 (ddd, *J* = 13.7, 11.3, 1.1 Hz, 2H), 4.37 (dt, *J* = 5.8, 1.4 Hz, 2H); <sup>13</sup>C NMR (101 MHz, CDCl<sub>3</sub>)  $\delta$  165.7, 155.3, 151.8, 131.2, 131.0, 127.4, 127.3, 118.5, 40.3.

*2-Allyl-4,7-bis(allyloxy)isoindoline-1,3-dione* **12i**. The title compound prepared following procedure B from 4,7-dihydroxy-isoindole-1,3-dione with 10 equivalents of allyl bromide was isolated (134 mg, 15%) as a pale yellow oil. <sup>1</sup>H NMR (400 MHz, CDCl<sub>3</sub>) δ 7.14 (s, 2H), 6.06 (ddt, *J* = 17.2, 10.3, 5.0 Hz, 2H), 5.86 (ddt, *J* = 16.0, 10.3, 5.7 Hz, 1H), 5.50 (dd, *J* = 17.3, 1.4 Hz, 2H), 5.33 (dd, *J* = 10.6, 1.3 Hz, 2H), 5.25 (dd, *J* = 17.1, 1.2 Hz, 1H), 5.16 (dd, *J* = 10.2, 1.1 Hz, 1H), 4.72 (dd, *J* = 3.5, 1.5 Hz, 4H), 4.23 (d, *J* = 5.7 Hz, 2H). <sup>13</sup>C NMR (101 MHz, CDCl<sub>3</sub>) δ 165.9, 149.9, 132.4, 131.7, 122.0, 119.2, 118.2, 117.3, 70.5, 39.8.

*2-Allyl-2H-pyrrolo[3,4-*b*]quinoline-1,3-dione* **12l**. The title compound prepared following procedure A was isolated (471 mg, 66%) as a white solid, Mp=182-185 °C. <sup>1</sup>H NMR (400 MHz, CDCl<sub>3</sub>) δ 8.68 (d, *J* = 3.9 Hz, 1H), 8.54 – 8.38 (m, 1H), 8.13 – 8.04 (m, 1H), 7.95 (s, 1H), 7.78 (d, *J* = 4.2 Hz, 1H), 6.07 – 5.88 (m, 1H), 5.30 (dd, *J* = 32.0, 13.6 Hz, 2H), 4.46 (d, *J* = 1.2 Hz, 2H); <sup>13</sup>C NMR (101 MHz, CDCl<sub>3</sub>) δ 165.8, 165.6, 150.9, 132.8, 132.7, 131.6, 130.9, 129.9, 129.6, 128.8, 123.0, 118.57, 40.6.

*(3*S*,4*R*)-1-Allyl-3,4-bis (benzyloxy)pyrrolidine-2,5-dione* **12m**. The title compound prepared following procedure A was isolated (537 mg, 51%) as a pale yellow oil. <sup>1</sup>H NMR (400 MHz, CDCl<sub>3</sub>) δ 7.53 – 7.29 (m, 10H), 5.78 (ddd, *J* = 17.0, 6.0, 4.2 Hz, 1H), 5.23 (t, *J* = 14.6 Hz, 2H), 4.99 (d, *J* = 11.6 Hz, 2H), 4.77 (d, *J* = 11.6 Hz, 2H), 4.40 (d, *J* = 6.0 Hz, 2H), 4.16 – 4.04 (m, 2H). <sup>13</sup>C NMR (101 MHz, CDCl<sub>3</sub>) δ 172.3, 136.5, 129.9, 128.6, 128.3, 119.3, 78.8, 73.5, 40.7;

*Meso-2-allyl-tetrahydrocyclopenta[*c*]pyrrole-1,3(2*H*,3*aH*)-dione* **12o**. The title compound prepared following procedure A was isolated (247 mg, 46%) as a pale yellow oil. <sup>1</sup>H NMR (400 MHz, CDCl<sub>3</sub>) δ 5.86 – 5.66 (m, 1H), 5.26 – 5.06 (m, 2H), 4.07 (dt, *J* = 5.8, 1.2 Hz, 2H), 3.17 (d, *J* = 8.9 Hz, 2H), 2.23 – 2.07 (m, 2H), 1.99 – 1.83 (m, 2H), 1.76 (ddd, *J* = 9.6, 8.3, 4.2 Hz, 1H), 1.40 – 1.20 (m, 1H); <sup>13</sup>C NMR (101 MHz, CDCl<sub>3</sub>) δ 179.8, 130.8, 118.1, 45.2, 40.9, 30.5, 24.8.

*Meso-hexahydro-2-(2-methylallyl)-2H-isoindole-1,3-dione* **12r**. The title compound prepared following procedure B was isolated (565 mg, 92%) as a white solid, Mp=47-49 °C. <sup>1</sup>H NMR (400 MHz, CDCl<sub>3</sub>) δ 4.87 (s, 1H), 4.76 (s, 1H), 4.02 (s, 2H), 2.89 (t, *J* = 4.5 Hz, 2H), 1.97 – 1.84 (m, 2H), 1.83 – 1.74 (m, 2H), 1.74 (s, 3H), 1.46 (dd, *J* = 12.1, 6.8 Hz, 4H); <sup>13</sup>C NMR (101 MHz, CDCl<sub>3</sub>) δ 179.4, 138.9, 112.1, 43.5, 39.7, 23.8, 21.7, 20.5.

*Meso* -3*a*,4,7,7*a*-Tetrahydro-2-(2-methylallyl)-2*H*-isoindole-1,3-dione **12q**. The title compound prepared following procedure B was isolated (498 mg, 81%) as a white solid, Mp=60-62 °C.

<sup>1</sup>H NMR (400 MHz, CDCl<sub>3</sub>) δ 6.07 – 5.81 (m, 2H), 4.83 (s, 1H), 4.70 (s, 1H), 4.00 (s, 2H), 3.26 – 3.04 (m, 2H), 2.65 (ddd, *J* = 16.0, 3.7, 1.6 Hz, 2H), 2.36 – 2.14 (m, 2H), 1.69 (s, 3H); <sup>13</sup>C NMR (101 MHz, CDCl<sub>3</sub>) δ 179.8, 138.4, 127.9, 111.9, 44.2, 39.1, 23.6, 20.3.

### General procedure for synthesis of tertiary alcohols

Vinyl magnesium bromide (1.5 mmol, 1*M* solution in THF) was added dropwise to a solution of *N*-allyl imide (1.0 mmol) in dry THF (10 mL) under N<sub>2</sub> atmosphere at –5-0 °C. The mixture was stirred at the same temperature until the completion of the reaction, as determined by TLC. Saturated NH<sub>4</sub>Cl solution (5 mL) was then added to the mixture and extracted with diethyl ether (2 x 25 mL). The combined organic phases were dried (anhydrous Na<sub>2</sub>SO<sub>4</sub>), filtered and the solvent removed under reduced pressure. The residue was purified by flash chromatography (SiO<sub>2</sub>, petroleum ether-ether) to afford the products.

(5*RS*)-1-Allyl-5-hydroxy-5-vinylpyrrolidin-2-one **6**. Compound was synthesized following the general procedure for synthesis of tertiary alcohols. Flash chromatography (SiO<sub>2</sub>, diethyl ether) afforded the product **6** (67 mg, 40%) as a colourless oil. <sup>1</sup>H NMR (400 MHz, CDCl<sub>3</sub>) δ 5.93 – 5.82 (m, 2H), 5.49 (dd, *J* = 17.2, 0.7 Hz, 1H), 5.35 (dd, *J* = 10.6, 0.7 Hz, 1H), 5.23 – 5.10 (m, 2H), 4.13 – 4.02 (m, 1H), 3.65 (dd, *J* = 15.5, 7.0 Hz, 1H), 2.60 (dd, *J* = 9.0, 8.2 Hz, 1H), 2.42-2.36 (m, 1H), 2.22 – 2.02 (m, 2H), 1.64 (s, 1H). <sup>13</sup>C NMR (101 MHz, CDCl<sub>3</sub>) δ 174.8, 139.3, 134.5, 117.4, 116.8, 91.4, 42.0, 34.4, 28.9; IR (ATR): ν 3303, 1667, 1403, 989, 924 cm<sup>-1</sup>; MS (EI): *m/z* 167.0 [M]<sup>+</sup>, 149.0, 137.0, 111.0, 83.0, 56.0; HRMS (ESI/Q-TOF) *m/z* calcd for [C<sub>9</sub>H<sub>13</sub>NO<sub>2</sub> + H]<sup>+</sup>: 168.1025, found 168.1019.

(3*RS*)-2-Allyl-3-hydroxy-3-vinylisoindolin-1-one **9**. Compound was synthesized following the general procedure for synthesis of tertiary alcohols. Flash chromatography (SiO<sub>2</sub>, 1:1 v/v petroleum ether-diethyl ether) afforded the product **9** (164 mg, 76%) as a white solid, mp 94-96 °C. <sup>1</sup>H NMR (400 MHz, CDCl<sub>3</sub>) δ 7.68 (dd, *J* = 12.6, 11.4 Hz, 1H), 7.55 (td, *J* = 7.2, 1.1 Hz, 1H), 7.45 (dd, *J* = 11.0, 4.1 Hz, 2H), 5.93 – 5.77 (m, 2H), 5.67 (dd, *J* = 17.0, 10.3 Hz, 1H), 5.42 (dd, *J* = 10.3, 1.4 Hz, 1H), 5.27 – 5.03 (m, 2H), 4.14 – 3.94 (m, 1H), 3.85 – 3.71 (m, 1H), 3.83 (s, 1H); <sup>13</sup>C NMR (101 MHz, CDCl<sub>3</sub>) δ 167.0, 146.7, 135.8, 134.01 132.5, 130.7, 129.7, 123.4, 122.6, 118.1, 117.3, 89.7, 41.3; IR (ATR): ν 3273, 1669, 1429, 1394, 927, 772, 698 cm<sup>-1</sup>; MS (EI): *m/z* 215.0 [M]<sup>+</sup>, 198.0,

188.0, 159.0, 131.0, 115.0, 103.0, 77.0, 56.1; HRMS (ESI/Q-TOF)  $m/z$  calcd for  $[C_{13}H_{13}NO_2 + H^+]$ : 216.1025, found 216.1019.

*(3RS,3aRS,7aSR)-2-Allyl-octahydro-3-hydroxy-3-vinylisoindol-1-one* **13a**. Compound was synthesized following the general procedure for synthesis of tertiary alcohols. Flash chromatography (SiO<sub>2</sub>, 1:1 v/v petroleum ether-diethyl ether) afforded the product **13a** (111 mg, 50%) as a colourless oil. <sup>1</sup>H NMR (400 MHz, CDCl<sub>3</sub>)  $\delta$  5.95 – 5.77 (m, 2H), 5.32 (dd,  $J$  = 13.6, 7.6 Hz, 2H), 5.21 (dd,  $J$  = 17.2, 1.5 Hz, 1H), 5.12 (dd,  $J$  = 10.2, 1.2 Hz, 1H), 4.12 (dd,  $J$  = 15.5, 5.0 Hz, 1H), 3.56 (dd,  $J$  = 15.5, 6.9 Hz, 1H), 2.52 (dd,  $J$  = 13.2, 6.5 Hz, 1H), 2.23–2.21 (m, 2H), 2.01 – 1.91 (m, 1H), 1.68 (dd,  $J$  = 14.4, 7.8 Hz, 3H), 1.39–1.33 (m, 4H); <sup>13</sup>C NMR (101 MHz, CDCl<sub>3</sub>)  $\delta$  175.8, 138.0, 135.1, 117.0, 116.4, 92.5, 41.9, 41.8, 40.0, 24.2, 23.19, 23.2, 22.3; IR (ATR):  $\nu$  3231, 2936, 1656, 1434, 924, 689 cm<sup>-1</sup>; MS (EI):  $m/z$  221.1 [M]<sup>+</sup>, 203.1, 188.0, 174.1, 162.0, 139.0, 91.0, 81.0, 55.0; HRMS (ESI/Q-TOF)  $m/z$  calcd for  $[C_{13}H_{19}NO_2 + H^+]$ : 222.1494, found 222.1488.

*(3RS,3aRS,7aSR)-2-Allyl-2,3,3a,4,7,7a-hexahydro-3-hydroxy-3-vinylisoindol-1-one* **13b**. Compound was synthesized following the general procedure for synthesis of tertiary alcohols. Flash chromatography (SiO<sub>2</sub>, 1:1 v/v petroleum ether-diethyl ether) afforded the product **13b** (183 mg, 91%) as a white solid, mp 57–59 °C. <sup>1</sup>H NMR (400 MHz, CDCl<sub>3</sub>)  $\delta$  5.91 – 5.70 (m, 4H), 5.50 (dd,  $J$  = 17.1, 1.0 Hz, 1H), 5.35 (dd,  $J$  = 10.5, 1.0 Hz, 1H), 5.13 (ddd,  $J$  = 13.7, 11.5, 1.4 Hz, 2H), 3.98 (ddt,  $J$  = 15.5, 5.7, 1.4 Hz, 1H), 3.71 (dd,  $J$  = 15.5, 6.3 Hz, 1H), 2.74 (s, 1H), 2.68 (dd,  $J$  = 15.6, 8.5 Hz, 1H), 2.46 (ddd,  $J$  = 16.3, 9.5, 4.3 Hz, 2H), 2.37 – 2.20 (m, 1H), 2.19 – 2.07 (m, 2H); <sup>13</sup>C NMR (101 MHz, CDCl<sub>3</sub>)  $\delta$  177.4, 138.6, 134.5, 126.3, 125.8, 117.5, 117.0, 92.4, 42.1, 39.5, 36.9, 23.9, 19.8; IR (ATR):  $\nu$  3343, 1660, 1412, 1095, 929 cm<sup>-1</sup>; MS (EI):  $m/z$  201.1 [M-OH]<sup>+</sup>, 186.0, 172.0, 158.0, 115.0; HRMS (ESI/Q-TOF)  $m/z$  calcd for  $[(C_{13}H_{17}NO_2 + H)^+ - H_2O]$ : 202.1232, found 202.1229.

*(3RS,3aRS,4SR,,7RS,7aSR)-2-Allyl-3-hydroxy-3-vinyl-2,3,3a,4,7,7a-hexahydro-1H-4,7-methanoisoindol-1-one* **13c**. Compound was synthesized following the general procedure for synthesis of tertiary alcohols. Flash chromatography (SiO<sub>2</sub>, 1:1 v/v petroleum ether-diethyl ether) afforded the product **13c** (220 mg, 95%) as a white solid, mp 98–99 °C. <sup>1</sup>H NMR (400 MHz, CDCl<sub>3</sub>)  $\delta$  6.26 (d,  $J$  = 3.0 Hz, 2H), 5.85 – 5.66 (m, 2H), 5.31 (d,  $J$  = 17.2 Hz, 1H), 5.25 – 5.11 (m, 2H), 5.05 (dd,  $J$  = 10.2, 1.3 Hz, 1H), 4.05 – 3.86 (m, 1H), 3.40 (dd,  $J$  = 15.6, 6.5 Hz, 1H), 3.37 – 3.28 (m, 1H), 3.19 (dd,  $J$  = 9.0, 4.8 Hz, 1H), 3.12 (d,  $J$  = 1.2 Hz, 1H), 2.88 (dd,  $J$  = 9.0, 4.0 Hz, 1H), 1.61 (dd,  $J$  = 6.5, 1.7 Hz, 2H), 1.41 (d,  $J$  = 8.5 Hz, 1H); <sup>13</sup>C NMR (101 MHz, CDCl<sub>3</sub>)  $\delta$  173.5, 140.8,

136.5, 134.9, 133.7, 116.6, 114.5, 90.4, 51.9, 49.6, 48.6, 45.8, 45.0, 42.0; IR (ATR):  $\nu$  3189, 2986, 1648, 1440, 1406, 1130, 945, 686  $\text{cm}^{-1}$ ; MS (EI):  $m/z$  231.1  $[\text{M}]^+$ , 213.0, 147.0, 134.0, 91.0, 66.0; HRMS (ESI/Q-TOF)  $m/z$  calcd for  $[\text{C}_{14}\text{H}_{17}\text{NO}_2 + \text{H}^+]$ : 232.1338, found 232.1329.

*(3RS)-2-Allyl-5,6-dichloro-3-hydroxy-3-vinylisoindolin-1-one* **13d**. Compound was synthesized following the general procedure for synthesis of tertiary alcohols. Flash chromatography ( $\text{SiO}_2$ , 7:3 v/v petroleum ether-diethyl ether) afforded the product **13d** (246 mg, 87%) as a white solid, mp 101-102  $^\circ\text{C}$ .  $^1\text{H}$  NMR (400 MHz,  $\text{CDCl}_3$ )  $\delta$  7.62 (s, 1H), 7.52 (s, 1H), 5.95 – 5.76 (m, 2H), 5.62 (ddd,  $J$  = 16.9, 10.4, 1.1 Hz, 1H), 5.48 (dd,  $J$  = 10.5, 0.9 Hz, 1H), 5.18 (ddd,  $J$  = 13.6, 11.3, 1.2 Hz, 2H), 4.06 (dd,  $J$  = 15.6, 6.1 Hz, 1H), 3.86 (dd,  $J$  = 15.6, 6.1 Hz, 1H), 3.63 (s, 1H);  $^{13}\text{C}$  NMR (101 MHz,  $\text{CDCl}_3$ )  $\delta$  165.0, 145.8, 137.1, 134.8, 134.7, 133.3, 130.3, 125.1, 125.1, 119.2, 117.9, 89.1, 41.7; IR (ATR):  $\nu$  3324, 1674, 1431, 1405, 1279, 931, 892, 773  $\text{cm}^{-1}$ ; MS (EI):  $m/z$  283.0  $[\text{M}]^+$ , 267.9, 255.9, 226.9, 197.9, 173.0, 165.0, 136.0, 56.1; HRMS (ESI/Q-TOF)  $m/z$  calcd for  $[\text{C}_{13}\text{H}_{11}\text{Cl}_2\text{NO}_2 + \text{H}^+]$ : 284.0245, found 284.0239.

*(3RS)-2-Allyl-4,5,6,7-tetrachloro-3-hydroxy-3-vinylisoindolin-1-one* **13e**. Compound **13e** was synthesized following the general procedure for synthesis of tertiary alcohols. Flash chromatography ( $\text{SiO}_2$ , 7:3 v/v petroleum ether-diethyl ether) afforded the product **13e** (226 mg, 64%) as a white solid, mp 138-140  $^\circ\text{C}$ .  $^1\text{H}$  NMR (400 MHz,  $\text{CDCl}_3$ )  $\delta$  5.93 – 5.77 (m, 2H), 5.68 – 5.55 (m, 2H), 5.25 (dd,  $J$  = 17.1, 1.3 Hz, 1H), 5.18 (dd,  $J$  = 10.1, 1.1 Hz, 1H), 4.11 (dd,  $J$  = 15.5, 6.2 Hz, 1H), 3.96 (dd,  $J$  = 15.5, 6.2 Hz, 1H), 3.64 (s, 1H);  $^{13}\text{C}$  NMR (101 MHz,  $\text{CDCl}_3$ )  $\delta$  162.6, 143.1, 137.9, 135.9, 132.9, 132.6, 129.1, 128.5, 127.1, 121.1, 118.4, 88.5, 41.9; IR (ATR):  $\nu$  3320, 1683, 1432, 1403, 1354, 1204, 944, 732  $\text{cm}^{-1}$ ; MS (EI):  $m/z$  352.9  $[\text{M}]^+$ , 283.8, 267.8, 241.8, 213.8, 69.0; HRMS (ESI/Q-TOF)  $m/z$  calcd for  $[\text{C}_{13}\text{H}_9\text{Cl}_4\text{NO}_2 + \text{H}^+]$ : 353.9436, found 353.9430.

*(5RS)-1-Allyl-5-hydroxy-3,3-dimethyl-5-vinylpyrrolidin-2-one* **13f**. Compound was synthesized following the general procedure for synthesis of tertiary alcohols. Flash chromatography ( $\text{SiO}_2$ , 6:4 v/v petroleum ether-diethyl ether) afforded the product **13f** (142 mg, 73%) as a colourless oil.  $^1\text{H}$  NMR (400 MHz,  $\text{CDCl}_3$ )  $\delta$  5.92 – 5.76 (m, 2H), 5.49 (d,  $J$  = 17.1 Hz, 1H), 5.30 (d,  $J$  = 10.6 Hz, 1H), 5.23 – 5.03 (m, 2H), 3.97 (dd,  $J$  = 15.5, 5.5 Hz, 1H), 3.82 – 3.75 (m, 1H), 3.70 (dd,  $J$  = 15.5, 6.4 Hz, 1H), 2.06 (d,  $J$  = 3.2 Hz, 2H), 1.30 (s, 3H), 1.18 (s, 3H);  $^{13}\text{C}$  NMR (101 MHz,  $\text{CDCl}_3$ )  $\delta$  180.0, 140.5, 134.6, 117.1, 116.3, 88.9, 49.3, 42.1, 39.6, 26.6, 26.3; IR (ATR):  $\nu$  3352, 1663, 1408, 1199, 987, 922  $\text{cm}^{-1}$ ; MS (EI):  $m/z$  195.0  $[\text{M}]^+$ , 177.1, 162.0, 148.0, 134.0; HRMS (ESI/Q-TOF)  $m/z$  calcd for  $[\text{C}_{11}\text{H}_{17}\text{NO}_2 + \text{H}^+]$ : 196.1338, found 196.1332.

(3*RS*)-2-Allyl-3-hydroxy-3-vinyl-2,3-dihydro-1*H*-benzo[*de*]isoquinolin-1-one **13g**. Compound was synthesized following the general procedure for synthesis of tertiary alcohols. Flash chromatography (SiO<sub>2</sub>, 1:1 v/v petroleum ether-diethyl ether) afforded the product **13g** (177 mg, 67 %) as a white solid, mp 128-130 °C. <sup>1</sup>H NMR (400 MHz, CDCl<sub>3</sub>) δ 8.12 (dd, *J* = 7.2, 1.1 Hz, 1H), 7.91 (dd, *J* = 8.2, 0.9 Hz, 1H), 7.87 – 7.79 (m, 1H), 7.71 (dd, *J* = 7.3, 0.9 Hz, 1H), 7.60 – 7.51 (m, 1H), 7.42 (dd, *J* = 8.1, 7.4 Hz, 1H), 5.96 (ddd, *J* = 17.2, 5.6, 4.6 Hz, 1H), 5.87 (ddd, *J* = 17.0, 10.4, 1.3 Hz, 1H), 5.67 (dd, *J* = 17.0, 1.1 Hz, 1H), 5.26 (dd, *J* = 10.3, 1.1 Hz, 1H), 5.19 (dd, *J* = 17.2, 1.6 Hz, 1H), 5.09 (dd, *J* = 10.2, 1.4 Hz, 1H), 4.47 – 4.30 (m, 1H), 4.22 – 4.10 (m, 1H), 3.97 (s, 1H); <sup>13</sup>C NMR (101 MHz, CDCl<sub>3</sub>) δ 162.5, 140.1, 135.3, 133.7, 131.9, 131.8, 128.2, 127.4, 126.6, 126.4, 126.2, 125.5, 116.4, 114.7, 87.7, 45.0; IR (ATR): ν 3250, 1634, 1607, 1440, 1582, 1396, 988, 781 cm<sup>-1</sup>; HRMS (ESI/Q-TOF) *m/z* calcd for [C<sub>17</sub>H<sub>15</sub>NO<sub>2</sub> + H<sup>+</sup>]: 266.1181, found 266.1176.

(7*RS*)-6-Allyl-6,7-dihydro-7-hydroxy-7-vinylpyrrolo[3,4-*b*]pyridin-5-one **13h**. Compound was synthesized following the general procedure for synthesis of tertiary alcohols. Flash chromatography (SiO<sub>2</sub>, 4:1 v/v diethyl ether-petroleum ether) afforded the product **13h** (160 mg, 74%) as a white solid, mp 125-127 °C. <sup>1</sup>H NMR (400 MHz, CDCl<sub>3</sub>) δ 8.62 (d, *J* = 4.8 Hz, 1H), 8.04 (d, *J* = 7.5 Hz, 1H), 7.37 (dd, *J* = 7.6, 5.0 Hz, 1H), 6.04 – 5.83 (m, 2H), 5.76 (dd, *J* = 17.0, 10.2 Hz, 1H), 5.55 (d, *J* = 10.2 Hz, 1H), 5.27 (d, *J* = 16.5 Hz, 1H), 5.17 (d, *J* = 10.1 Hz, 1H), 4.21 (dd, *J* = 15.6, 5.8 Hz, 2H), 3.99 (dd, *J* = 15.7, 5.9 Hz, 1H); <sup>13</sup>C NMR (101 MHz, CDCl<sub>3</sub>) δ 165.1, 165.0, 152.9, 134.4, 133.7, 132.0, 125.0, 124.6, 119.9, 117.6, 89.5, 41.6; IR (ATR): ν 3265, 1667, 1396, 986, 798, 729 cm<sup>-1</sup>; MS (EI): *m/z* 216.0 [M]<sup>+</sup>, 189.0, 175.0, 160.0, 104.0, 78.0; HRMS (ESI/Q-TOF) *m/z* calcd for [C<sub>12</sub>H<sub>12</sub>N<sub>2</sub>O<sub>2</sub> + H<sup>+</sup>]: 217.0977, found 217.0972.

(3*RS*)-2-Allyl-4,7-bis(allyloxy)-3-hydroxy-3-vinylisoindolin-1-one **13i**. Compound was synthesized following the general procedure for synthesis of tertiary alcohols. Flash chromatography (SiO<sub>2</sub>, 1:1 v/v petroleum ether-diethyl ether) afforded the product **13i** (255 mg, 78%) as a pale yellow solid, mp 117-120 °C. <sup>1</sup>H NMR (400 MHz, CDCl<sub>3</sub>) δ 6.92 (d, *J* = 8.9 Hz, 1H), 6.85 (d, *J* = 8.9 Hz, 1H), 6.14 – 5.87 (m, 3H), 5.80 (dd, *J* = 17.1, 10.3 Hz, 1H), 5.65 (dd, *J* = 17.1, 1.0 Hz, 1H), 5.49 (dd, *J* = 17.3, 1.5 Hz, 1H), 5.44-5.38 (m, 2H), 5.31 – 5.19 (m, 3H), 5.11 (dd, *J* = 10.2, 1.3 Hz, 1H), 4.64 (dt, *J* = 5.0, 1.4 Hz, 2H), 4.59 – 4.48 (m, 2H), 4.13 (dd, *J* = 15.7, 6.0 Hz, 1H), 3.86 (dd, *J* = 15.7, 6.0 Hz, 1H), 3.02 (s, 1H); <sup>13</sup>C NMR (101 MHz, CDCl<sub>3</sub>) δ 165.3, 150.0, 147.6, 135.7, 135.6, 134.4, 133.1, 132.8, 119.7, 117.7 (2C) 117.5, 116.9, 115.9, 88.3, 70.4, 69.6, 41.3; IR (ATR): ν 3297, 1672,

1497, 1267, 918, 807  $\text{cm}^{-1}$ ; MS (EI):  $m/z$  327.0  $[\text{M}]^+$ , 206.9, 54.9; HRMS (ESI/Q-TOF)  $m/z$  calcd for  $[\text{C}_{19}\text{H}_{21}\text{NO}_4 + \text{H}^+]$ : 328.1549, found 328.1545.

*l-Allyl-5-hydroxy-3-methyl-5-vinylpyrrolidin-2-one* **13j**. Compound was synthesized following the general procedure for synthesis of tertiary alcohols. Flash chromatography ( $\text{SiO}_2$ , 1:1 v/v petroleum ether-diethyl ether) afforded the major regioisomer **13j** (80 mg, 44%). Stereochemistry of this product could not be determined by standard NMR experiments. Other regioisomer was isolated as a complex mixture and attempts were not made to further purify and characterize it.  $^1\text{H}$  NMR (400 MHz,  $\text{CDCl}_3$ )  $\delta$  5.93 – 5.77 (m, 2H), 5.37 (d,  $J = 17.2$  Hz, 1H), 5.24 (d,  $J = 10.6$  Hz, 1H), 5.17 (dd,  $J = 17.2, 1.4$  Hz, 1H), 5.08 (dd,  $J = 10.2, 1.2$  Hz, 1H), 4.44 – 4.27 (m, 1H), 3.96 (dd,  $J = 15.5, 5.9$  Hz, 1H), 3.67 (dd,  $J = 15.5, 6.0$  Hz, 1H), 2.46 (dt,  $J = 17.2, 7.9$  Hz, 2H), 1.82 (dd,  $J = 12.3, 6.6$  Hz, 1H), 1.36 – 1.22 (m, 3H);  $^{13}\text{C}$  NMR (101 MHz,  $\text{CDCl}_3$ )  $\delta$  176.8, 138.9, 134.5, 116.9, 115.5, 89.9, 43.0, 42.1, 35.3, 16.8; IR (ATR):  $\nu$  3320, 1664, 1408, 988, 923  $\text{cm}^{-1}$ ; MS (EI):  $m/z$  181.1  $[\text{M}]^+$ , 163.0, 148.0, 134.0, 120.0, 107.0; HRMS (ESI/Q-TOF)  $m/z$  calcd for  $[\text{C}_{10}\text{H}_{15}\text{NO}_2 + \text{H}^+]$ : 182.1181, found 182.1173.

*l-Allyl-5-hydroxy-3-phenyl-5-vinylpyrrolidin-2-one* **13k**. Compound was synthesized following the general procedure for synthesis of tertiary alcohols. Flash chromatography ( $\text{SiO}_2$ , 9:1 v/v diethyl ether-petroleum ether) afforded the alcohol **13k** (73 mg, 30%) as an inseparable mixture of two regioisomers (7.3 : 1, pale yellow oil).  $^1\text{H}$  NMR (400 MHz,  $\text{CDCl}_3$ )  $\delta$  7.50 – 7.15 (m, 5H, both regioisomers), 5.99 – 5.88 (m, 2H, major regioisomer), 5.86-5.80 (m, 1H, minor regioisomer), 5.47 (d,  $J = 17.2$  Hz, 1H, major regioisomer), 5.36 (d,  $J = 10.5$  Hz, 1H, major regioisomer), 5.25 (d,  $J = 4.0$  Hz, 1H, major), 5.23 (m, 2H, major regioisomer), 4.19 – 4.16 (m, 2H, major regioisomer), 4.04 (dd,  $J = 9.5, 4.7$  Hz, 1H, minor), 3.77-3.34 (m, 1H, both regioisomers), 3.23 (dd,  $J = 18.5, 9.6$  Hz, 1H, minor regioisomer), 2.54 (dd,  $J = 13.5, 8.5$  Hz, 1H, major regioisomer), 2.18 (dd,  $J = 13.5, 10.1$  Hz, 1H, major regioisomer);  $^{13}\text{C}$  NMR (101 MHz,  $\text{CDCl}_3$ )  $\delta$  173.9, 139.0, 138.8, 134.7, 129.2, 128.8, 128.0, 127.3, 127.2, 118.6, 117.5, 116.5, 90.0, 46.4, 43.2, 42.4, 41.2, 37.1, 30.3, 29.7; IR (ATR):  $\nu$  3372, 1698, 1665, 1395, 1334, 925, 697  $\text{cm}^{-1}$ ; MS (EI):  $m/z$   $[\text{M}]^+$  243.1, 225.0, 210.0, 188.0, 160.0, 145.0, 131.0; HRMS (ESI/Q-TOF)  $m/z$  calcd for  $[\text{C}_{15}\text{H}_{17}\text{NO}_2 + \text{H}^+]$ : 244.1338, found 244.1327.

(3*RS*)-2-Allyl-2,3-dihydro-3-hydroxy-3-vinylpyrrolo[3,4-*b*]quinolin-1-one **13l**. Compound was synthesized following the general procedure for synthesis of tertiary alcohols. Flash chromatography ( $\text{SiO}_2$ , 3:2 v/v diethyl ether-petroleum ether) afforded the product **13l** (146 mg, 55%) as a white solid, mp 146-148  $^\circ\text{C}$ .  $^1\text{H}$  NMR (400 MHz,  $\text{CDCl}_3$ )  $\delta$  8.28 (s, 1H), 8.07 (d,  $J = 8.5$



Hz, 1H), 7.77 (dd,  $J = 16.6, 8.0$  Hz, 2H), 7.57 (t,  $J = 7.5$  Hz, 1H), 6.14 – 5.92 (m, 2H), 5.84 (dd,  $J = 17.0, 10.2$  Hz, 1H), 5.58 (d,  $J = 10.3$  Hz, 1H), 5.34 (d,  $J = 17.1$  Hz, 1H), 5.22 (d,  $J = 10.1$  Hz, 1H), 4.61 (s, 1H), 4.31 (dd,  $J = 15.5, 6.3$  Hz, 1H), 4.09 (dd,  $J = 15.5, 5.9$  Hz, 1H);  $^{13}\text{C}$  NMR (101 MHz,  $\text{CDCl}_3$ )  $\delta$  164.8, 163.5, 149.4, 134.7, 133.8, 132.5, 131.7, 129.4, 129.3, 127.9, 127.7, 122.4, 119.9, 117.8, 89.7, 41.9; IR (ATR):  $\nu$  3179, 1665, 1629, 1431, 1403, 1156, 760  $\text{cm}^{-1}$ ; MS (EI):  $m/z$  266.0  $[\text{M}]^+$ , 250.0, 239.0, 224.9, 211.0, 128.0; HRMS (ESI/Q-TOF)  $m/z$  calcd for  $[\text{C}_{16}\text{H}_{14}\text{N}_2\text{O}_2 + \text{H}^+]$ : 267.1134, found 267.1126.

(3*SR*,4*RS*,5*RS*)-1-Allyl-3,4-bis(benzyloxy)-5-hydroxy-5-vinylpyrrolidin-2-one **13m**. Two products were prepared from *N*-allyl-*meso*-tartramide following the general procedure for synthesis of tertiary alcohols. Flash chromatography ( $\text{SiO}_2$ , 6:4 v/v diethyl ether-petroleum ether) afforded two diastereomeric products **13m** (125 mg, 33%) and **13m'** (163 mg, 43%). Compound **13m** was isolated as a white solid, mp 55-57 °C.  $^1\text{H}$  NMR (400 MHz,  $\text{CDCl}_3$ )  $\delta$  7.74 – 6.97 (m, 10H), 5.85 (tt,  $J = 10.2, 8.6$  Hz, 2H), 5.62 – 5.51 (m, 1H), 5.45 (d,  $J = 10.7$  Hz, 1H), 5.20 (dd,  $J = 17.2, 1.3$  Hz, 1H), 5.13 (dd,  $J = 10.2, 1.2$  Hz, 1H), 5.00 (d,  $J = 11.8$  Hz, 1H), 4.77 (d,  $J = 11.8$  Hz, 1H), 4.68 (d,  $J = 11.9$  Hz, 1H), 4.57 (d,  $J = 11.8$  Hz, 1H), 4.07 (d,  $J = 5.3$  Hz, 1H), 4.00 (dd,  $J = 15.6, 5.6$  Hz, 1H), 3.94 (d,  $J = 5.4$  Hz, 1H), 3.66 (dd,  $J = 15.5, 6.2$  Hz, 1H), 2.80 (s, 1H);  $^{13}\text{C}$  NMR (101 MHz,  $\text{CDCl}_3$ )  $\delta$  169.8, 137.3, 137.3, 134.4, 133.9, 128.5, 128.1, 128.0, 127.9, 127.8, 118.7, 117.4, 90.6, 86.9, 78.7, 72.9, 72.6, 41.7; IR (ATR):  $\nu$  3305, 1670, 1068, 1392, 948, 927, 697  $\text{cm}^{-1}$ ; MS (EI):  $m/z$ , 361.1  $[\text{M}-\text{H}_2\text{O}]^+$ , 324.1, 288.1, 270.1, 182.0, 167.0, 91.0; HRMS (ESI/Q-TOF)  $m/z$  calcd for  $[\text{C}_{23}\text{H}_{25}\text{NO}_4 + \text{H}^+]$ : 380.1862, found 380.1855.

(3*SR*,4*RS*,5*SR*)-1-Allyl-3,4-bis(benzyloxy)-5-hydroxy-5-vinylpyrrolidin-2-one **13 m'** Compound **13m'** was isolated as a white solid, mp 48-50 °C.  $^1\text{H}$  NMR (400 MHz,  $\text{CDCl}_3$ )  $\delta$  7.43 – 7.23 (m, 10H), 5.87 – 5.63 (m, 3H), 5.42 (dd,  $J = 9.8, 1.8$  Hz, 1H), 5.21 – 5.05 (m, 3H), 4.79 (d,  $J = 11.7$  Hz, 1H), 4.70 – 4.59 (m, 2H), 4.20 (d,  $J = 6.1$  Hz, 1H), 3.95 – 3.85 (m, 2H), 3.76 (dd,  $J = 15.6, 5.6$  Hz, 1H), 3.54 (s, 1H);  $^{13}\text{C}$  NMR (101 MHz,  $\text{CDCl}_3$ )  $\delta$  170.9, 137.6, 137.5, 136.6, 133.5, 128.6, 128.4, 128.3, 128.2, 128.0, 127.9, 119.3, 117.2, 86.8, 82.5, 78.4, 73.2, 72.8, 42.3; IR (ATR):  $\nu$  3408, 1698, 1685, 1452, 1103, 934, 734  $\text{cm}^{-1}$ ; HRMS (ESI/Q-TOF)  $m/z$  calcd for  $[\text{C}_{23}\text{H}_{25}\text{NO}_4 + \text{H}^+]$ : 380.1862, found 380.1852.

(3*R*,4*R*,5*R*)-1-Allyl-3,4-bis(benzyloxy)-5-hydroxy-5-vinylpyrrolidin-2-one **13n**. Compound **13n** was synthesized from *N*-allyl-*L*-tartramide following the general procedure for synthesis of tertiary alcohols. Flash chromatography ( $\text{SiO}_2$ , 1:1 v/v petroleum ether-diethyl ether) afforded the product

**13n** (261 mg, 69%) as a white solid, mp 37-40 °C. <sup>1</sup>H NMR (400 MHz, CDCl<sub>3</sub>) δ 7.45 – 7.18 (m, 10H), 5.88 – 5.63 (m, 3H), 5.42 (dd, *J* = 9.7, 1.9 Hz, 1H), 5.21 – 5.05 (m, 3H), 4.79 (d, *J* = 11.7 Hz, 1H), 4.64 (d, *J* = 5.1 Hz, 2H), 4.20 (d, *J* = 6.1 Hz, 1H), 3.97 – 3.85 (m, 2H), 3.81 – 3.71 (m, 1H), 3.55 (s, 1H); <sup>13</sup>C NMR (101 MHz, CDCl<sub>3</sub>) δ 170.9, 137.6, 137.5, 136.6, 133.5, 128.6, 128.4, 128.3, 128.2, 128.0, 127.9, 119.3, 117.2, 86.8, 82.5, 78.4, 73.2, 72.8, 42.3; IR (ATR): ν 3408, 1698, 1686, 1102, 735, 697 cm<sup>-1</sup>; MS (EI): *m/z* 361.1 [M-H<sub>2</sub>O]<sup>+</sup>, 324.0, 270.0, 242.0, 167.0, 91.0; HRMS (ESI/Q-TOF) *m/z* calcd for [C<sub>23</sub>H<sub>25</sub>NO<sub>4</sub> + H<sup>+</sup>]: 380.1862, found 380.1855.

*(3RS,3aRS,6aSR)-2-Allyl-hexahydro-3-hydroxy-3-vinylcyclopenta[c]pyrrol-1(2H)-one* **13o**

Compound was synthesized following the general procedure for synthesis of tertiary alcohols. Flash chromatography (SiO<sub>2</sub>, 1:1 v/v petroleum ether-diethyl ether) afforded the product **13o** (160 mg, 77%) as a colorless oil. <sup>1</sup>H NMR (400 MHz, CDCl<sub>3</sub>) δ 5.85 (dt, *J* = 17.1, 10.3 Hz, 2H), 5.31 (d, *J* = 17.2 Hz, 1H), 5.17 (dd, *J* = 22.9, 5.9 Hz, 2H), 5.08 (dd, *J* = 10.2, 1.3 Hz, 1H), 3.97 (dd, *J* = 15.5, 5.8 Hz, 1H), 3.67 (s, 1H), 3.61 (dd, *J* = 15.6, 6.0 Hz, 1H), 2.92 (td, *J* = 9.1, 3.5 Hz, 1H), 2.74 – 2.62 (m, 1H), 2.11 – 1.99 (m, 1H), 1.94 (dd, *J* = 11.9, 6.2 Hz, 1H), 1.88 – 1.80 (m, 1H), 1.75 – 1.55 (m, 3H); <sup>13</sup>C NMR (101 MHz, CDCl<sub>3</sub>) δ 176.36, 140.6, 134.6, 116.6, 114.5, 90.9, 48.4, 46.6, 42.1, 29.5, 27.2, 26.1; IR (ATR): ν 3322, 2955, 1660, 1408, 989, 928 cm<sup>-1</sup>; MS (EI): *m/z* 207.1 [M]<sup>+</sup>, 189.1, 160.0, 132.0, 106.0, 91.0; HRMS (ESI/Q-TOF) *m/z* calcd for [C<sub>12</sub>H<sub>17</sub>NO<sub>2</sub> + H<sup>+</sup>]: 208.1338, found 208.1327.

*(3RS)-3-Hydroxy-2-(2-methylallyl)-3-vinylisoindolin-1-one* **13p**. Compound was synthesized following the general procedure for synthesis of tertiary alcohols. Flash chromatography (SiO<sub>2</sub>, 6:4 v/v diethyl ether- petroleum ether) afforded the product **13p** (160 mg, 70%) as a pale yellow solid, mp 115-116 °C. <sup>1</sup>H NMR (400 MHz, CDCl<sub>3</sub>) δ 7.72 (d, *J* = 7.5 Hz, 1H), 7.55 (dd, *J* = 7.4, 0.9 Hz, 1H), 7.46 (dd, *J* = 14.7, 7.4 Hz, 2H), 5.87 – 5.58 (m, 2H), 5.41 (dd, *J* = 9.7, 1.9 Hz, 1H), 4.83 (d, *J* = 12.2 Hz, 2H), 4.08 (d, *J* = 15.9 Hz, 1H), 3.73 (d, *J* = 16.0 Hz, 1H), 3.26 (s, 1H), 1.74 (s, 3H); <sup>13</sup>C NMR (101 MHz, CDCl<sub>3</sub>) δ 167.2, 146.5, 142.1, 135.9, 132.5, 130.7, 129.8, 123.6, 122.6, 118.1, 112.1, 89.9, 44.5, 20.4; IR (ATR): ν 3245, 1671, 1431, 1392, 765, 690 cm<sup>-1</sup>; MS (EI): *m/z* 229.1 [M]<sup>+</sup>, 212.1, 196.0, 182.0, 159.0, 131.0, 103.0; HRMS (ESI/Q-TOF) *m/z* calcd for [C<sub>14</sub>H<sub>15</sub>NO<sub>2</sub> + H<sup>+</sup>]: 230.1181, found 230.1175.

*(3RS,3aRS,7aSR)-2,3,3a,4,7,7a-Hexahydro-3-hydroxy-2-(2-methylallyl)-3-vinylisoindol-1-one* **13q**.

Compound was synthesized following the general procedure for synthesis of tertiary alcohols. Flash chromatography (SiO<sub>2</sub>, 4:1 v/v diethyl ether- petroleum ether) afforded the product **13q** (158 mg,

68%) as a white solid, mp 57-59 °C. <sup>1</sup>H NMR (400 MHz, CDCl<sub>3</sub>) δ 5.96 – 5.70 (m, 3H), 5.48 (dd, *J* = 17.1, 0.9 Hz, 1H), 5.36 (dd, *J* = 10.5, 0.9 Hz, 1H), 4.82 (d, *J* = 9.3 Hz, 2H), 4.02 (d, *J* = 15.4 Hz, 1H), 3.60 (d, *J* = 15.5 Hz, 1H), 2.69 (dd, *J* = 16.2, 8.2 Hz, 1H), 2.58 – 2.38 (m, 3H), 2.37 – 2.20 (m, 1H), 2.20 – 2.10 (m, 1H), 2.19 – 2.08 (m, 1H), 1.74 (s, 3H); <sup>13</sup>C NMR (101 MHz, CDCl<sub>3</sub>) δ 177.6, 143.1, 138.6, 126.3, 125.6, 117.6, 112.2, 92.6, 45.1, 39.3, 37.0, 24.2, 20.4, 19.7; IR (ATR): ν 3207, 3024, 1656, 1640, 1423, 1130, 919, 900, 661 cm<sup>-1</sup>; MS (EI): *m/z* 233.1 [M]<sup>+</sup>, 215.1, 200.0, 186.0, 160.0, 144.0, 117.0, 91.0; HRMS (ESI/Q-TOF) *m/z* calcd for [C<sub>14</sub>H<sub>19</sub>NO<sub>2</sub> + H<sup>+</sup>] : 234.1494, found 234.1487.

(3*RS*,3*aRS*,7*aSR*)-Octahydro-3-hydroxy-2-(2-methylallyl)-3-vinylisoindol-1-one **13r**. Compound was synthesized following the general procedure for synthesis of tertiary alcohols. Flash chromatography (SiO<sub>2</sub>, 7:3 v/v diethyl ether- petroleum ether) afforded the product **13r** (160 mg, 68%) as a white solid, mp 77-79 °C. <sup>1</sup>H NMR (400 MHz, CDCl<sub>3</sub>) δ 5.81 (dd, *J* = 17.2, 10.5 Hz, 1H), 5.32 (dd, *J* = 13.9, 6.5 Hz, 2H), 4.85 (d, *J* = 7.5 Hz, 2H), 4.13 (d, *J* = 15.5 Hz, 1H), 3.44 (d, *J* = 15.5 Hz, 1H), 2.52 (q, *J* = 6.8 Hz, 1H), 2.21 (dd, *J* = 13.6, 6.9 Hz, 1H), 2.03 – 1.89 (m, 1H), 1.77 – 1.62 (m, 6H), 1.53 – 1.38 (m, 3H), 1.42 – 1.24 (m, 2H); <sup>13</sup>C NMR (101 MHz, CDCl<sub>3</sub>) δ 176.2, 143.8, 138.0, 116.4, 112.0, 92.9, 45.0, 41.6, 40.1, 24.5, 23.4, 23.1, 22.3, 20.5; IR (ATR): ν 3206, 2937, 1655, 1639, 1434, 957 cm<sup>-1</sup>; MS (EI): *m/z* 235.1 [M]<sup>+</sup>, 217.0, 188.1, 160.0, 134.0, 91.0; HRMS (ESI/Q-TOF) *m/z* calcd for [C<sub>14</sub>H<sub>21</sub>NO<sub>2</sub> + H<sup>+</sup>]: 236.1651, found 236.1645.

### General procedure for hydrolysis of pyrrolizinones

To a solution of pyrrolizinone (0.2 mmol) in THF (2 mL), 1*N* solution of LiOH (0.8 mmol, 4 eq) was added, and the mixture refluxed for 1h. After completion of the reaction (determined by TLC), the mixture was cooled to room temperature, acidified with 1*M* HCl to pH~2 and extracted with ethyl acetate (2 x 20 mL). The combined organic phases were dried with anhydrous Na<sub>2</sub>SO<sub>4</sub>, filtered and solvent was removed under reduced pressure. The residue was purified by flash chromatography to afford the products.

3-(1*H*-pyrrol-2-yl) propanoic acid **15a**<sup>3</sup> Compound was synthesized from pyrrolizinone **7** following the general procedure for pyrrolizinone hydrolysis. Flash chromatography (SiO<sub>2</sub>, 1:1 v/v petroleum ether-diethyl ether) afforded the product **15a** (21.4 mg, 77%) as a white solid, mp 109-111 °C. <sup>1</sup>H NMR (400 MHz, CDCl<sub>3</sub>) δ 8.36 (s, 1H), 6.68 (dd, *J* = 4.0, 2.6 Hz, 1H), 6.12 (dd, *J* = 5.7, 2.8 Hz, 1H), 5.94 (s, 1H), 2.93 (t, *J* = 6.8 Hz, 2H), 2.72 (t, *J* = 6.8 Hz, 2H); <sup>13</sup>C NMR (101 MHz, CDCl<sub>3</sub>) δ

178.2, 130.5, 116.9, 108.2, 105.6, 34.0, 22.4; IR (ATR):  $\nu$  3355, 2881, 1669, 1407, 1237, 756, 733  $\text{cm}^{-1}$ . HRMS (ESI/Q-TOF)  $m/z$  calculated for  $[\text{C}_7\text{H}_9\text{NO}_2 + \text{H}^+]$ : 140.0712, found 140.0715.

*2-(1H-Pyrrol-2-yl)benzoic acid 15b*<sup>4</sup> Compound was synthesized from pyrrolizinone **11** following the general procedure for hydrolysis of pyrrolizinone. Flash chromatography ( $\text{SiO}_2$ , 1:1 v/v petroleum ether-diethyl ether) afforded the product **15b** (24 mg, 64%) as a pale yellow crystals, mp 138-141 °C.  $^1\text{H}$  NMR (400 MHz,  $\text{CDCl}_3$ )  $\delta$  10.10 (s, 1H), 7.95 (dd,  $J = 7.9, 1.1$  Hz, 1H), 7.70 (dd,  $J = 8.0, 0.8$  Hz, 1H), 7.54 (ddd,  $J = 8.8, 7.7, 1.4$  Hz, 1H), 7.34 – 7.27 (m, 1H), 6.92 (dd,  $J = 4.2, 2.6$  Hz, 1H), 6.59 – 6.50 (m, 1H), 6.31 (dd,  $J = 6.0, 2.6$  Hz, 1H);  $^{13}\text{C}$  NMR (101 MHz,  $\text{CDCl}_3$ )  $\delta$  172.1, 134.1, 132.7, 131.5, 130.3, 126.2, 126.0, 119.4, 110.2, 109.5; IR (ATR):  $\nu$  3355, 2881, 1669, 1407, 1237, 734  $\text{cm}^{-1}$ ; HRMS (ESI/Q-TOF)  $m/z$  calcd for  $[\text{C}_{11}\text{H}_9\text{NO}_2 + \text{H}^+]$ : 188.0712, found 188.0714.

*4,5-dichloro-2-(1H-pyrrol-2-yl) benzoic acid 15c*. Compound was synthesized from pyrrolizinone **14d** following the general procedure for pyrrolizinone hydrolysis. Flash chromatography ( $\text{SiO}_2$ , 4:1 v/v diethyl ether-petroleum ether) afforded the product **15c** (37.7 mg, 74%) as a yellow solid, mp 141-146 °C.  $^1\text{H}$  NMR (400 MHz,  $\text{CDCl}_3$ )  $\delta$  10.19 (s, 1H), 8.06 (s, 1H), 7.79 (s, 1H), 6.94 (d,  $J = 1.4$  Hz, 1H), 6.57 (s, 1H), 6.31 (d,  $J = 3.2$  Hz, 1H);  $^{13}\text{C}$  NMR (101 MHz,  $\text{CDCl}_3$ )  $\delta$  170.9, 137.5, 134.1, 133.5, 131.8, 129.8, 128.0, 124.9, 120.5, 111.6, 110.0; IR (ATR):  $\nu$  3378, 2849, 2357, 1675, 1308, 1244, 726, 683  $\text{cm}^{-1}$ ; HRMS (ESI/Q-TOF)  $m/z$  calculated for  $[\text{C}_{11}\text{H}_7\text{Cl}_2\text{NO}_2 + \text{H}^+]$ : 255.9932, found 255.9946.

### Derivatization of pyrrolizinones

*5H-pyrrolo[2,1-a]isoindole-5-thione 16*. To a solution of pyrrolizinone **11** (20 mg, 0.12 mmol) in dry toluene (2 mL) Lawesson's reagent (48.5 mg, 0.12 mmol) was added under nitrogen atmosphere and the mixture was refluxed overnight. Toluene was removed under reduced pressure and the residue was purified by flash chromatography ( $\text{SiO}_2$ , 95:5 v/v petroleum ether-diethyl ether) to afford the products **16** (22 mg, 99%) as a brownish red crystals, mp 62-63 °C.  $^1\text{H}$  NMR (400 MHz,  $\text{CDCl}_3$ )  $\delta$  7.69 (d,  $J = 7.6$  Hz, 1H), 7.38 (t,  $J = 7.5$  Hz, 1H), 7.19 (d,  $J = 7.5$  Hz, 1H), 7.12 (dd,  $J = 11.9, 5.1$  Hz, 2H), 6.17 (d,  $J = 2.9$  Hz, 1H), 6.08 (t,  $J = 3.2$  Hz, 1H);  $^{13}\text{C}$  NMR (101 MHz,  $\text{CDCl}_3$ )  $\delta$  192.5, 140.4, 138.0, 134.4, 133.9, 127.3, 126.0, 118.9, 117.8, 117.0, 107.9; IR (ATR):  $\nu$  1615, 1435, 1397, 1288, 1072, 832, 766, 678  $\text{cm}^{-1}$ ; MS (EI):  $m/z$  185.0  $[\text{M}]^+$ , 158.0, 140.0, 127.0, 114.0.

(*Z/E*)-Ethyl 2-(5*H*-pyrrolo[2,1-*a*]isoindol-5-ylidene)acetate **17**. To a solution of pyrrolizinone **11** (20 mg, 0.12 mmol) in dry toluene (3 mL) (ethyloxycarbonylmethylene)triphenylphosphorane (49.1 mg, 0.14 mmol) was added under nitrogen atmosphere and the mixture was refluxed for four days. Toluene was removed under reduced pressure, and the residue was purified by flash chromatography (SiO<sub>2</sub>, 9:1 v/v petroleum ether-diethyl ether) to afford the product **17** (11.7 mg, 41%; *Z/E* ratio: 3:1 ) as a yellow oil; <sup>1</sup>H NMR (400 MHz, CDCl<sub>3</sub>) δ 8.90 (d, *J* = 7.9 Hz, 1H, *E*-isomer), 8.34 (d, *J* = 3.0 Hz, 1H *Z*-isomer), 7.50 (d, *J* = 7.8 Hz, 1H *Z*-isomer), 7.34 (dd, *J* = 8.5, 6.3 Hz, 2H *Z*-isomer + 2H *E*-isomer), 7.21 – 7.09 (m, 1H *Z*-isomer + 1H *E*-isomer), 6.98 (d, *J* = 2.9 Hz, 1H *E*-isomer), 6.29 – 6.21 (m, 1H *Z*-isomer + 2H *E*-isomer), 6.21 – 6.15 (m, 1H, *Z*-isomer), 6.09 (s, 1H *E*-isomer), 5.96 (s, 1H *Z*-isomer), 4.27 (q, *J* = 7.1 Hz, 2H *Z*-isomer + 2H *E*-isomer), 1.36 (s, 3H *Z*-isomer + 3H *E*-isomer); <sup>13</sup>C NMR (101 MHz, CDCl<sub>3</sub>) δ 166.2, 165.6, 143.9, 138.0, 136.9, 134.7, 134.5, 134.0, 133.1, 131.7, 131.3, 129.4, 127.1, 126.5, 125.7, 123.3, 121.6, 118.8, 118.7, 117.2, 115.7, 115.0, 114.2, 107.3, 103.6, 103.1, 99.1, 94.6, 60.3, 14.4; IR (ATR): ν 1708, 1644, 1615, 1220, 1156, 752, 724 cm<sup>-1</sup>; MS (EI): *m/z* 239.0 [M]<sup>+</sup>, 211.0, 194.0, 167.0, 139.0, 96.9, 69.5; HRMS (ESI/Q-TOF) *m/z* calcd for [C<sub>15</sub>H<sub>13</sub>NO<sub>2</sub> + H<sup>+</sup>] : 240.1025, found 240.1017.

(*RS*)-5-Vinyl-5*H*-pyrrolo[2,1-*a*]isoindol-5-ol **18**. Compound was synthesized from pyrrolizinone **11** (20 mg, 0.12 mmol) and vinyl magnesium bromide (0.36 mmol) following the general procedure for synthesis of tertiary alcohols. Flash chromatography (SiO<sub>2</sub>, 1:1 v/v petroleum ether-diethyl ether) afforded the product **18** (15.8 mg, 67%) as pale yellow crystals, mp 59-61 °C. <sup>1</sup>H NMR (400 MHz, CDCl<sub>3</sub>) δ 7.39-7.31 (m, 3H), 7.16 (td, *J* = 7.5, 0.9 Hz, 1H), 6.96 – 6.84 (m, 1H), 6.32 (t, *J* = 3.1 Hz, 1H), 6.27 (dd, *J* = 3.4, 0.8 Hz, 1H), 6.07 (dd, *J* = 17.0, 10.5 Hz, 1H), 5.43 (d, *J* = 17.0 Hz, 1H), 5.39 – 5.29 (m, 1H), 2.82 (s, 1H); <sup>13</sup>C NMR (101 MHz, CDCl<sub>3</sub>) δ 146.1, 136.6, 134.6, 132.2, 129.8, 125.7, 123.4, 118.8, 116.9, 115.6, 113.7, 100.3, 89.4; IR (ATR): ν 3319, 1089, 939, 749, 718 cm<sup>-1</sup>; MS (EI): *m/z* 197.0 [M]<sup>+</sup>, 182.0, 168.0, 141.0, 115.0; HRMS (ESI/Q-TOF) *m/z* calcd for [C<sub>13</sub>H<sub>11</sub>NO + H<sup>+</sup>]: 198.0919, found 198.0912.

10*H*-Pyrrolizino[1,2-*b*]quinolin-10-one-*N*-oxide **19**. The mixture of pyrrolizinone **14I** (20 mg, 0.1 mmol) and MCPBA (70 %, 60 mg, 0.24 mmol) in dry acetone (5 mL) was refluxed for 1h. After completion of the reaction, as indicated by TLC, the mixture was cooled to room temperature, and solvent was removed under reduced pressure. The residue was purified by flash chromatography (SiO<sub>2</sub>, diethyl ether) to afford the product **19** (15.8 mg, 72%) as a orange solid, mp 206-208 °C. <sup>1</sup>H NMR (400 MHz, CDCl<sub>3</sub>) δ 8.72 (d, *J* = 8.6 Hz, 1H), 8.04 (s, 1H), 7.92 (d, *J* = 8.0 Hz, 1H), 7.90 – 7.81 (m, 1H), 7.67 (d, *J* = 1.0 Hz, 1H), 7.28 (d, *J* = 2.4 Hz, 1H), 7.07 – 7.01 (m, 1H), 6.49 (t, *J* = 3.2

Hz, 1H);  $^{13}\text{C}$  NMR (101 MHz,  $\text{CDCl}_3$ )  $\delta$  158.8, 144.4, 136.8, 133.0, 130.7, 129.5, 129.0, 128.6, 126.9, 124.6, 119.9, 119.6, 118.9, 114.0; IR (ATR):  $\nu$  1745, 1392, 1293, 1245, 1218, 1064, 769, 733  $\text{cm}^{-1}$ ; MS (EI):  $m/z$  220.0  $[\text{M}]^+-\text{O}$ , 192.0, 164.0, 137.9; HRMS (ESI/Q-TOF)  $m/z$  calcd for  $[\text{C}_{14}\text{H}_8\text{N}_2\text{O}_2 + \text{H}^+]$ : 237.0664, found 237.0665.

## References

- 1 A. Kamal, S.F. Adil, J. R.Tamboli, B. Siddardha, U. S. N. Murthy, *Lett.Drug Des.Discov.*, 2008, **5**, 261.
- 2 X. M. Chen, Y. B. Kang, *Org.Lett.*, 2016, **18**, 2700.
- 3 E. Cuevas-Yanez, J. M. Muchowski, R. Cruz-Almanza *Tetrahedron*, 2004, **60**, 1505.
- 4 T. Itahara, *Fukusokan Kagaki Toronkai Koen Yoshishu 12<sup>th</sup>*, 1979, 86.

# Copies of NMR spectra of synthesized pyrrolizinones and their derivatives

## Quinolactacide **1**

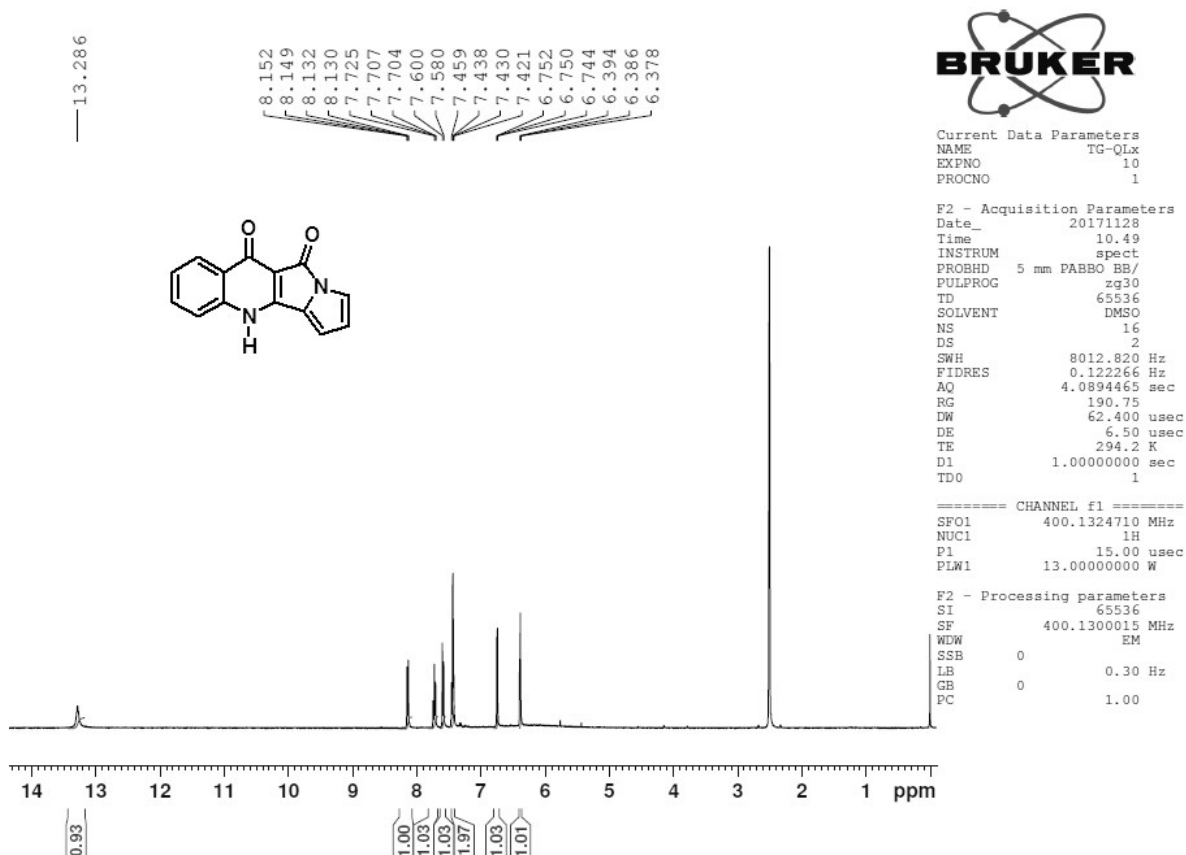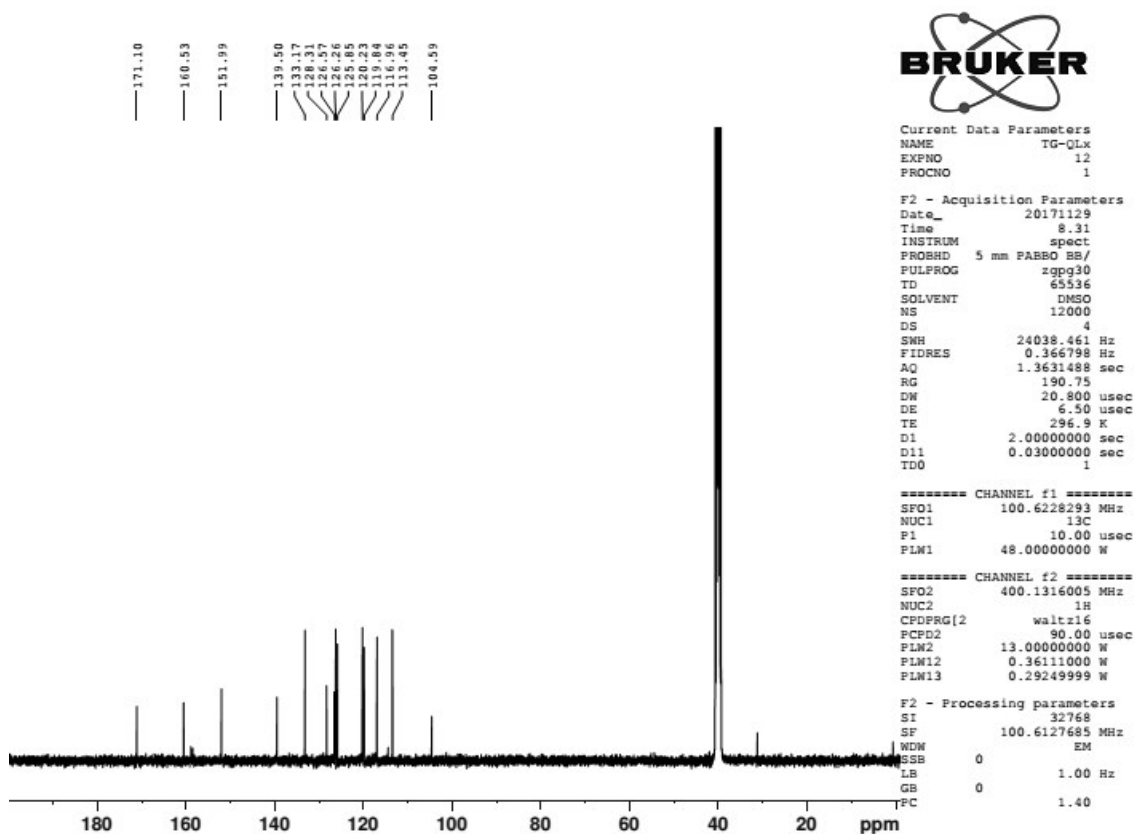

# Compound 7

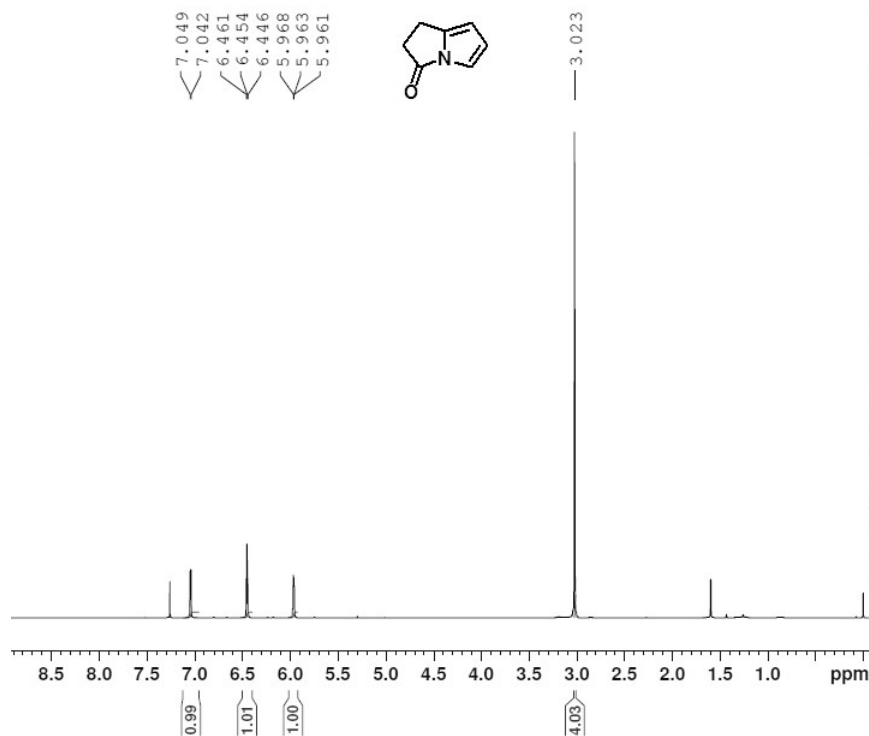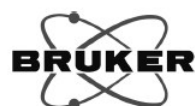

Current Data Parameters  
NAME MS-687  
EXPNO 20  
PROCNO 1

F2 - Acquisition Parameters  
Date\_ 20170321  
Time 21.09  
INSTRUM spect  
PROBHD 5 mm PABBO BB/  
PULPROG zg30  
TD 65536  
SOLVENT CDC13  
NS 16  
DS 2  
SWH 8012.820 Hz  
FIDRES 0.122266 Hz  
AQ 4.0894465 sec  
RG 190.75  
DW 62.400 usec  
DE 6.50 usec  
TE 299.4 K  
D1 1.00000000 sec  
TD0 1

===== CHANNEL f1 =====  
SFO1 400.1324710 MHz  
NUC1 1H  
P1 15.00 usec  
PLW1 13.00000000 W

F2 - Processing parameters  
SI 65536  
SF 400.1300092 MHz  
WDW EM  
SSB 0  
LB 0.30 Hz  
GB 0  
PC 1.00

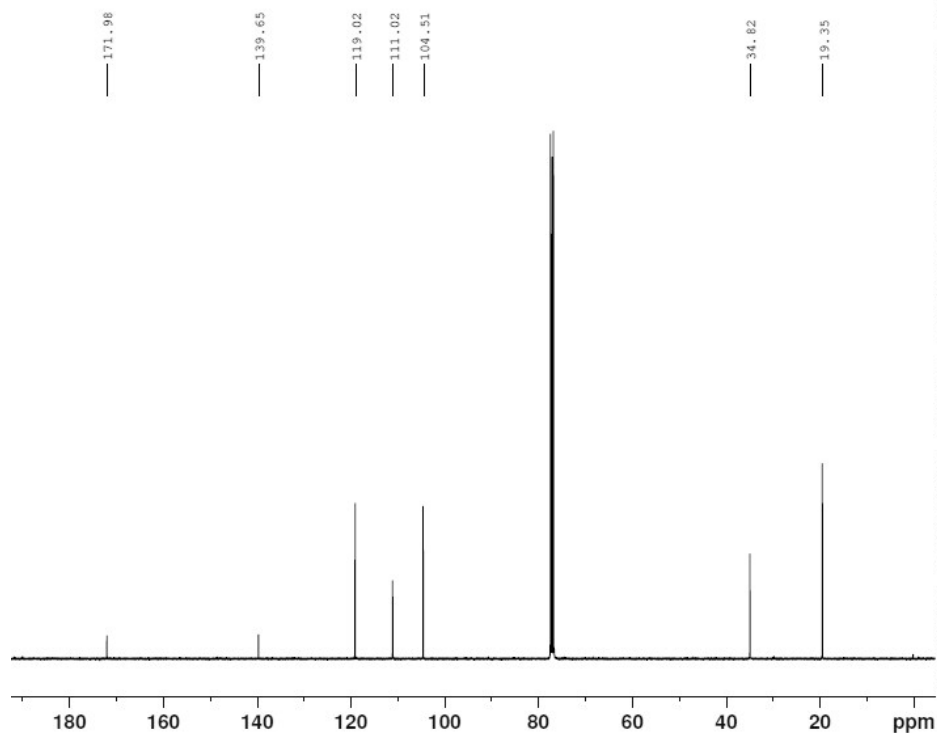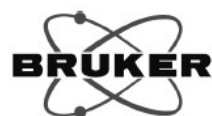

Current Data Parameters  
NAME MS-687  
EXPNO 25  
PROCNO 1

F2 - Acquisition Parameters  
Date\_ 20170322  
Time 1.50  
INSTRUM spect  
PROBHD 5 mm PABBO BB/  
PULPROG zgpg30  
TD 65536  
SOLVENT CDC13  
NS 3000  
DS 4  
SWH 24038.461 Hz  
FIDRES 0.366798 Hz  
AQ 1.3631488 sec  
RG 190.75  
DW 20.800 usec  
DE 6.50 usec  
TE 302.5 K  
D1 2.00000000 sec  
D11 0.03000000 sec  
TD0 1

===== CHANNEL f1 =====  
SFO1 100.6228293 MHz  
NUC1 13C  
P1 10.00 usec  
PLW1 48.00000000 W

===== CHANNEL f2 =====  
SFO2 400.1316005 MHz  
NUC2 1H  
CPDPRG[2] waltz16  
PCPD2 90.00 usec  
PLW2 13.00000000 W  
PLW12 0.36111000 W  
PLW13 0.29249999 W

F2 - Processing parameters  
SI 32768  
SF 100.6127685 MHz  
WDW EM  
SSB 0  
LB 1.00 Hz  
GB 0  
PC 1.40



# Compound 10

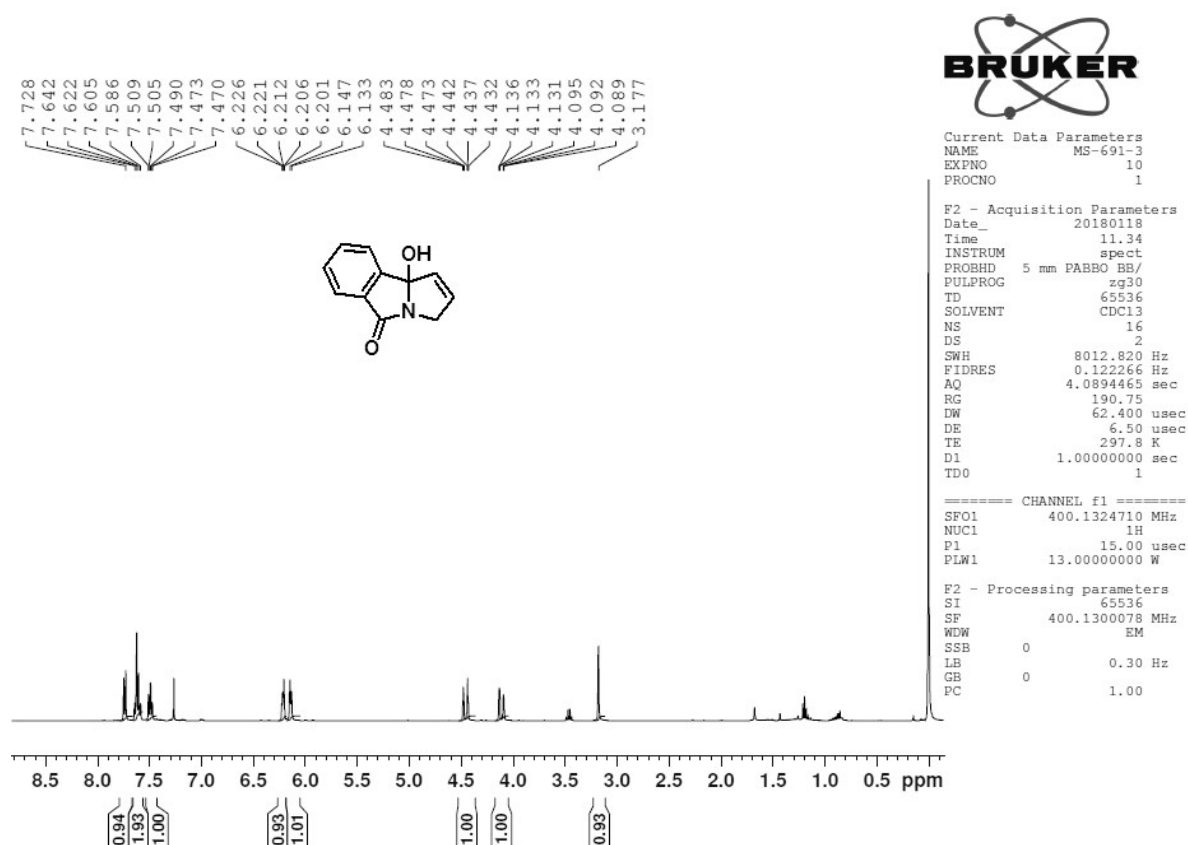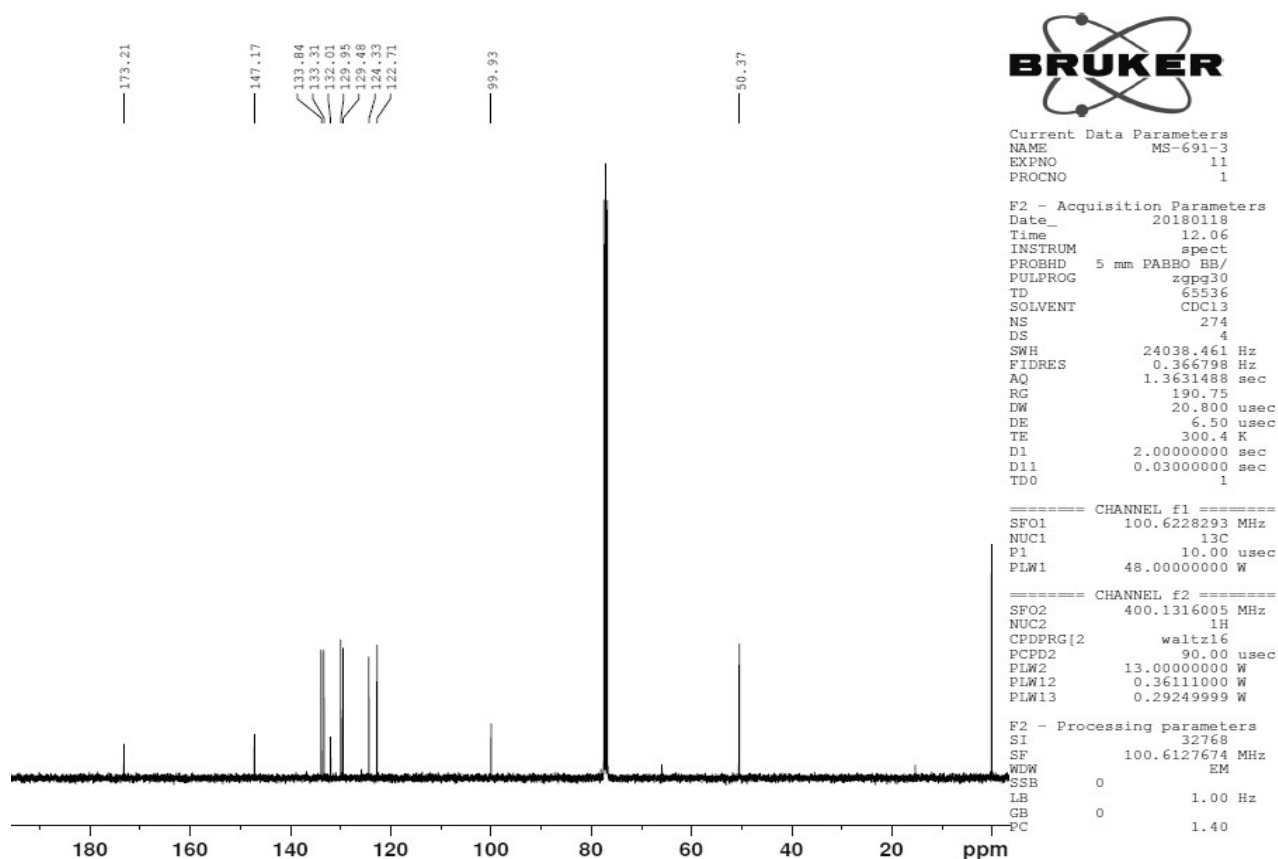

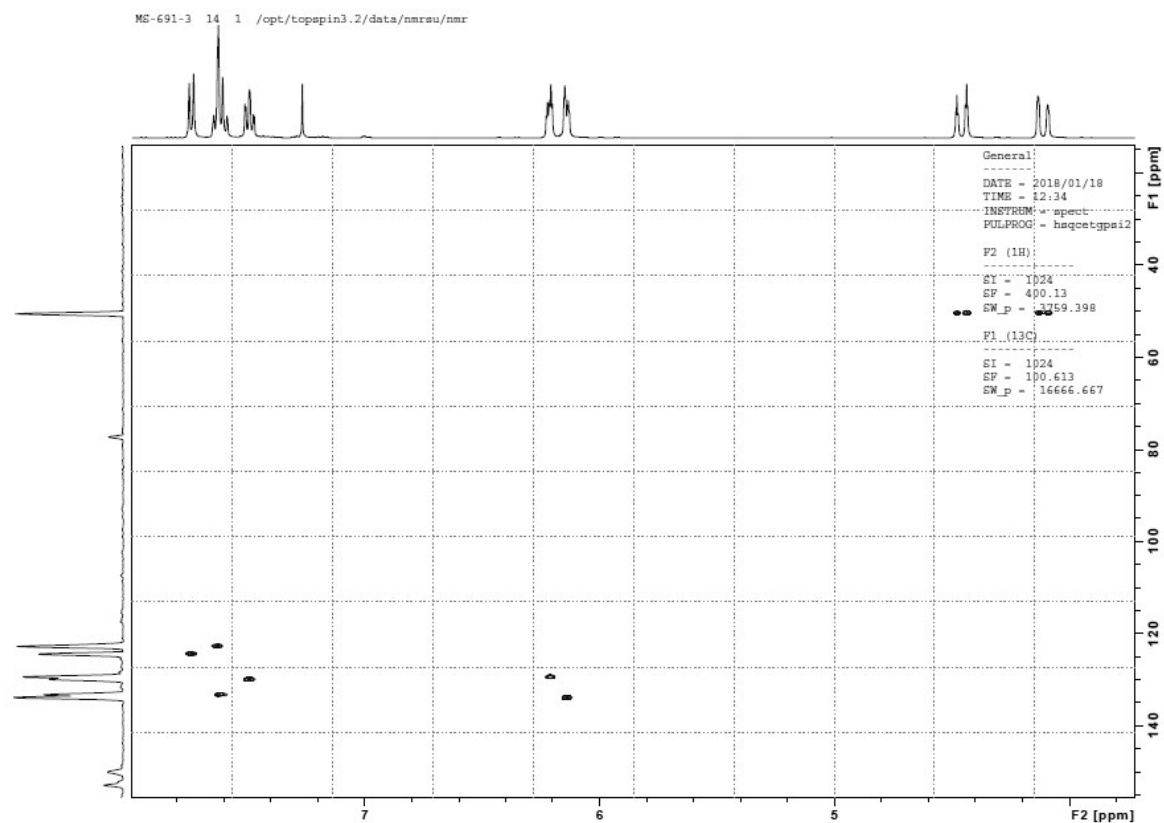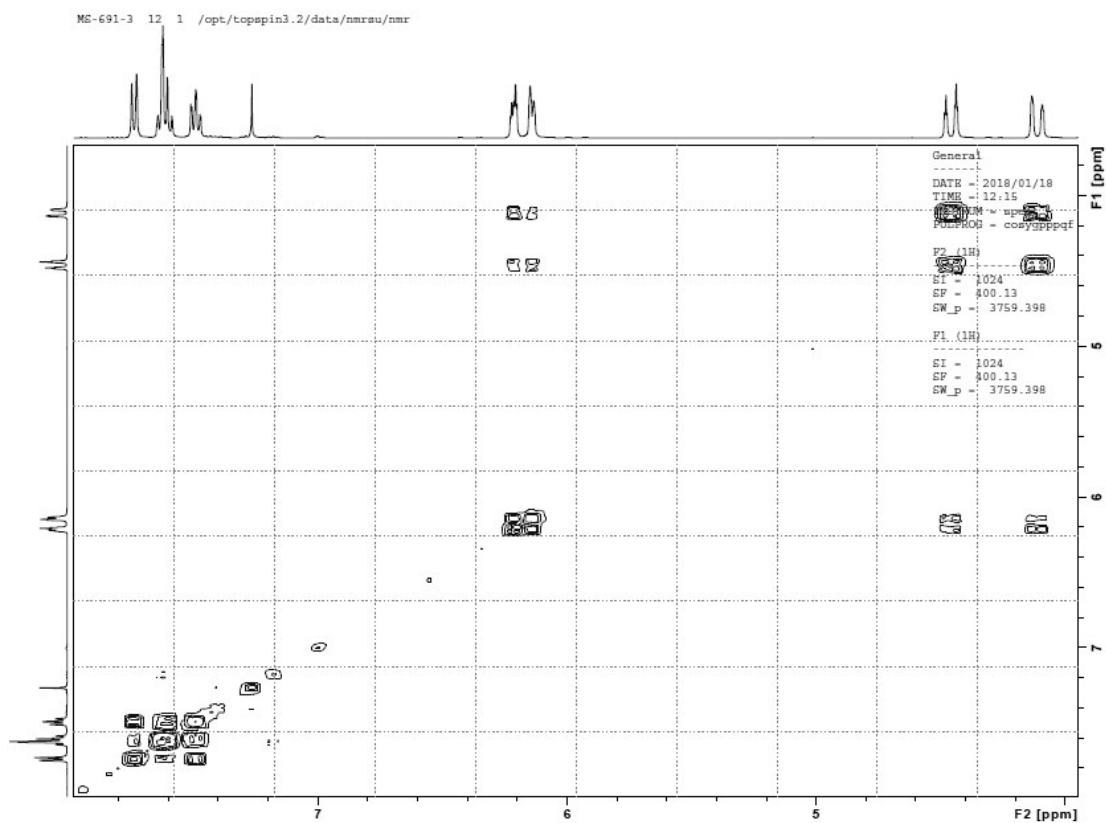

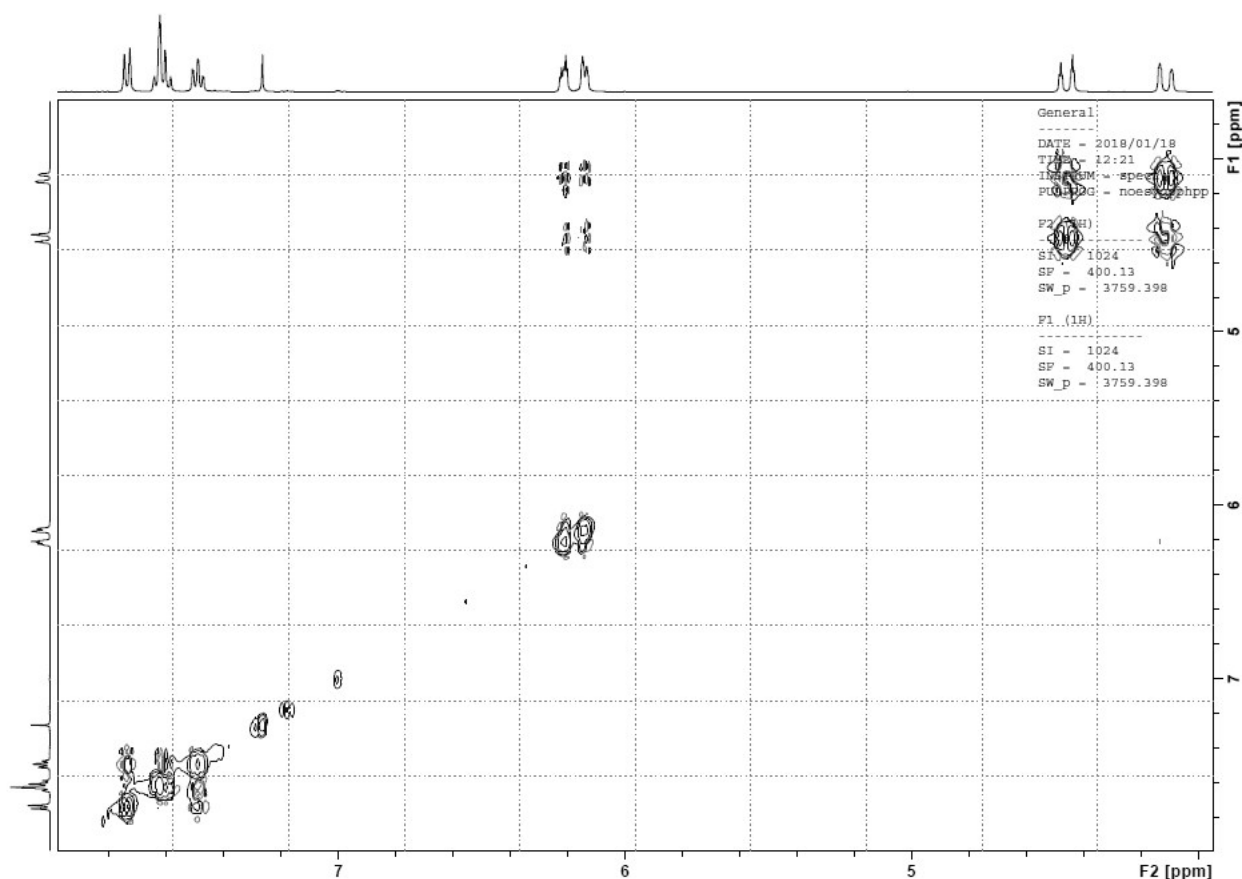

Compound 11

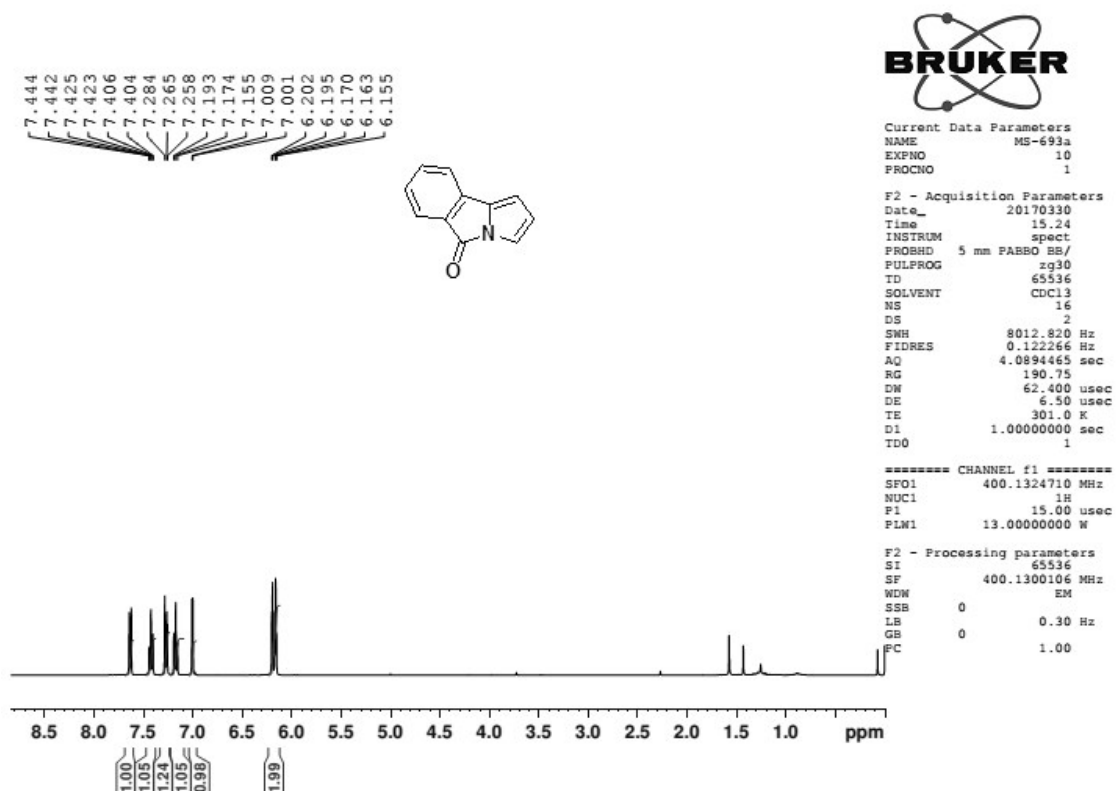

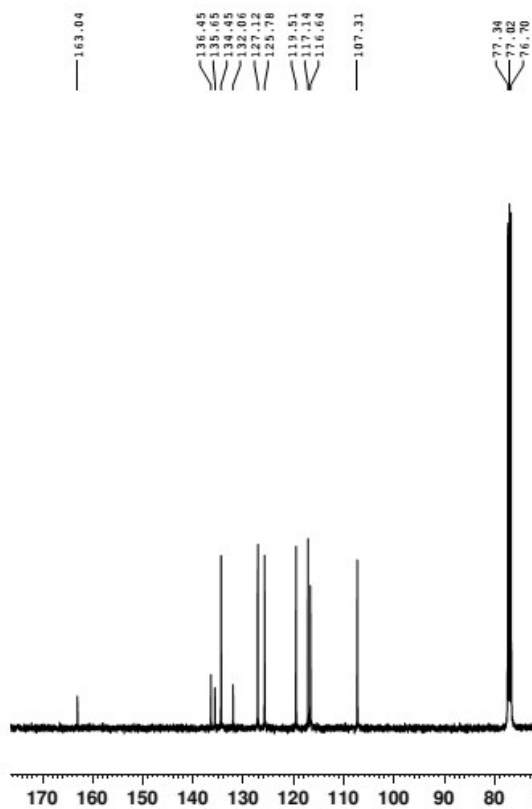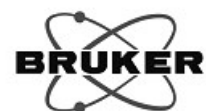

Current Data Parameters  
 NAME MS-693  
 EXPNO 11  
 PROCNO 1

F2 - Acquisition Parameters  
 Date\_ 20170330  
 Time 11.56  
 INSTRUM spect  
 PROBHD 5 mm PABBO BB/  
 PULPROG zgpg30  
 TD 65536  
 SOLVENT CDCl3  
 NS 959  
 DS 4  
 SWH 24038.461 Hz  
 FIDRES 0.366798 Hz  
 AQ 1.3631488 sec  
 RG 190.75  
 DW 20.800 usec  
 DE 6.50 usec  
 TE 302.8 K  
 D1 2.00000000 sec  
 D11 0.03000000 sec  
 TDO 1

===== CHANNEL f1 =====  
 SFO1 100.6228293 MHz  
 NUC1 13C  
 P1 10.00 usec  
 PLW1 48.00000000 W

===== CHANNEL f2 =====  
 SFO2 400.1316005 MHz  
 NUC2 1H  
 CPDPRG2 waltz16  
 PCPD2 90.00 usec  
 PLW2 13.00000000 W  
 PLW12 0.36111000 W  
 PLW13 0.29249999 W

F2 - Processing parameters  
 SI 32768  
 SF 100.6127685 MHz  
 WDW EM  
 SSB 0  
 LB 1.00 Hz  
 GB 0  
 PC 1.40

MS-693-a 12 1 /opt/topepin3.2/data/nmrnu/nmr

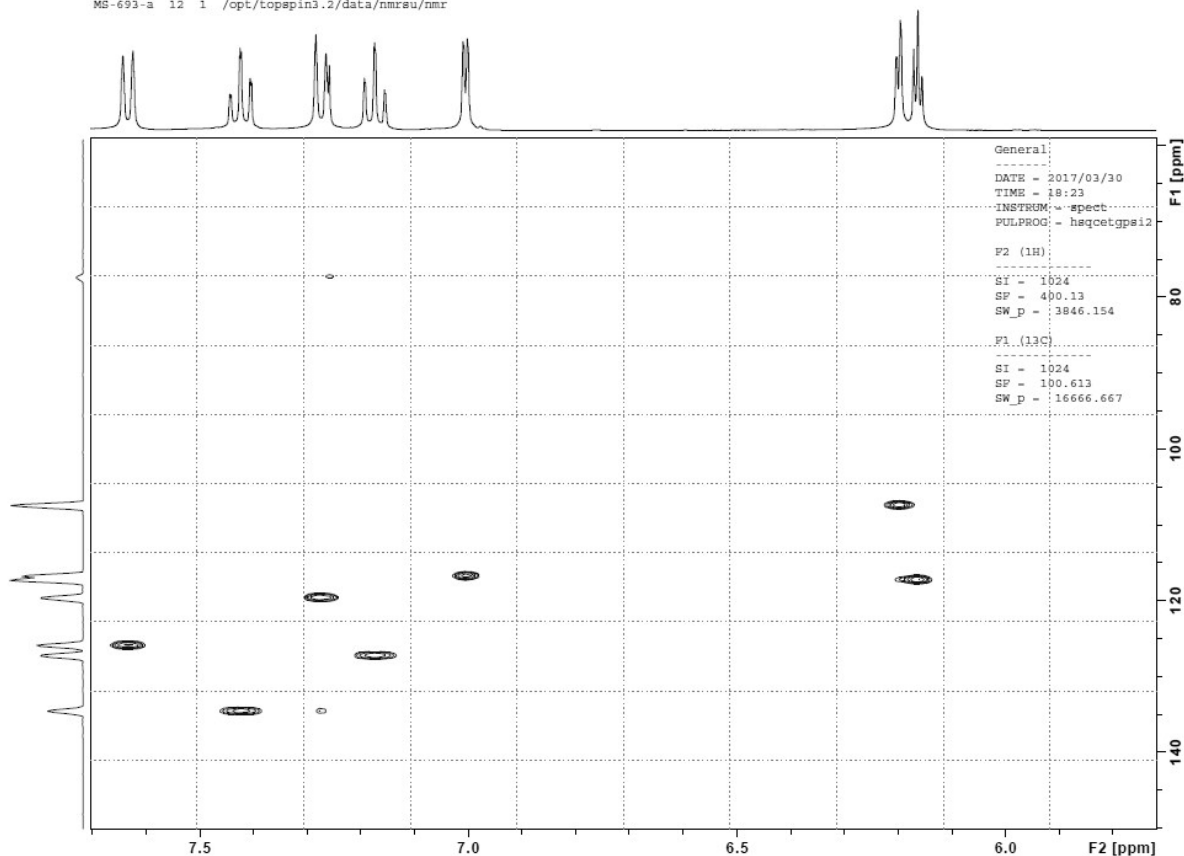

MS-693-a 11 1 /opt/topspin3.2/data/nmrau/nmr

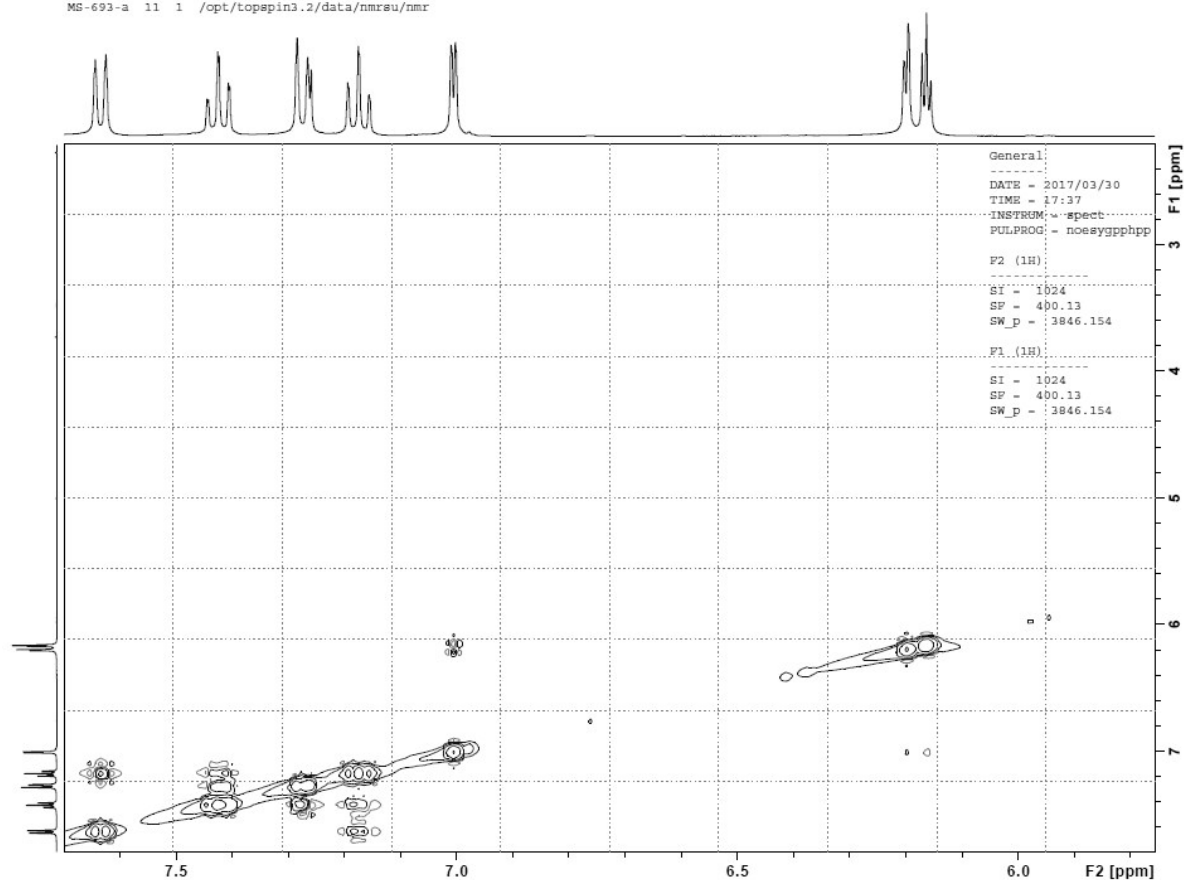

Compound **14a**

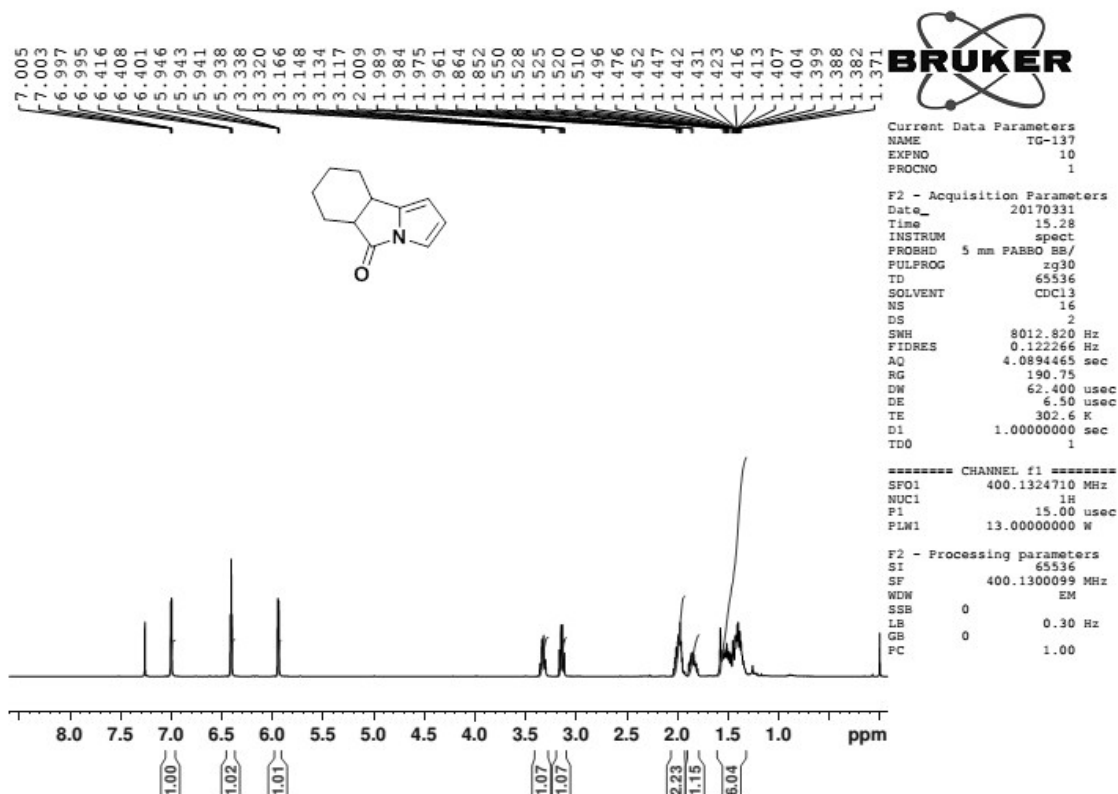

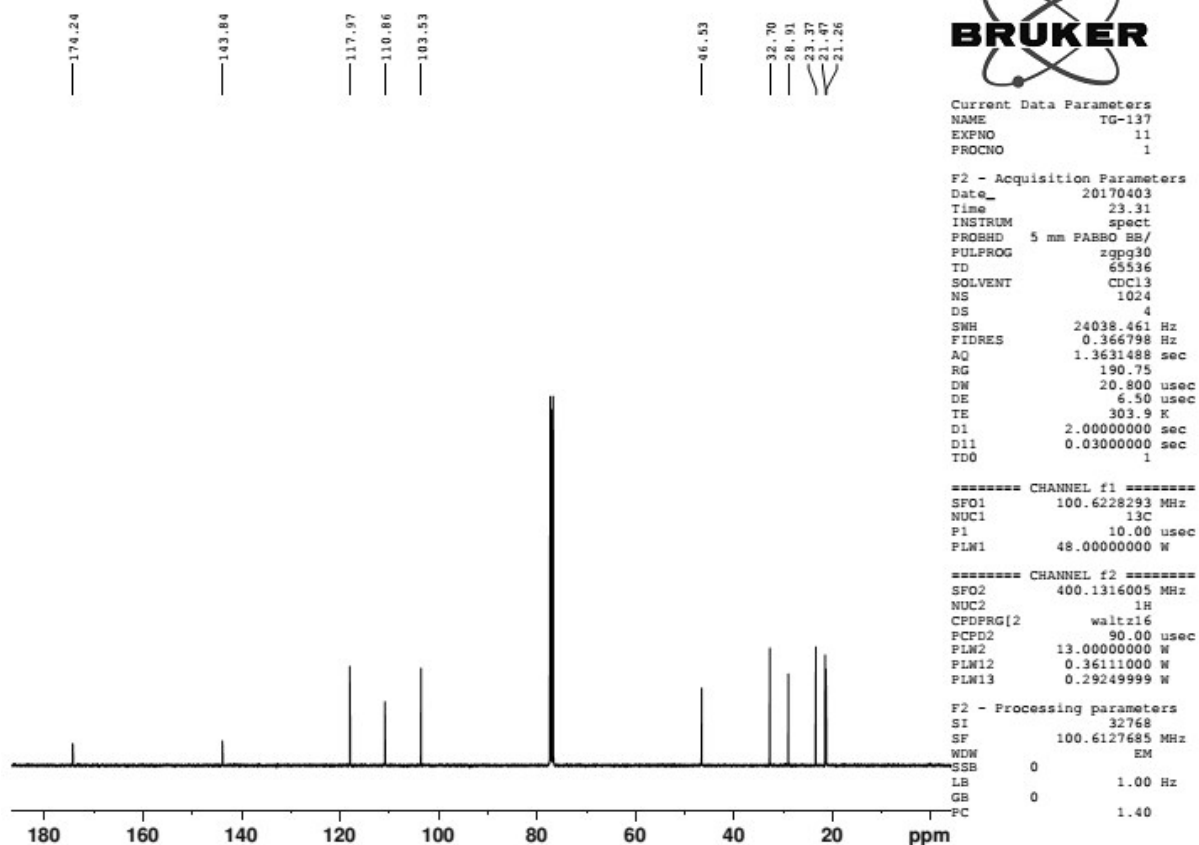

Compound **14b**

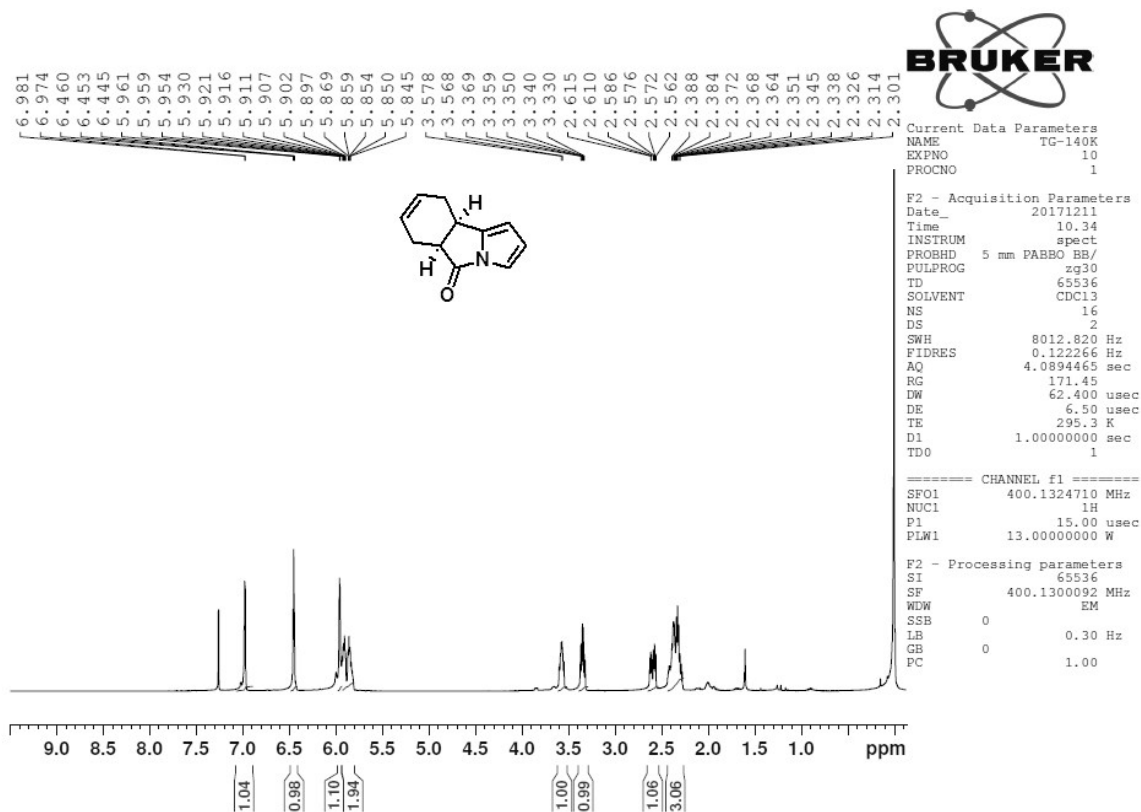

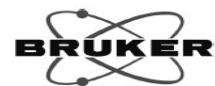

Current Data Parameters  
 NAME TG-140K  
 EXPNO 1  
 PROCNO 1

F2 - Acquisition Parameters  
 Date 20171211  
 Time 11.41  
 INSTRUM spect  
 PROBHD 5 mm PABBO BB/  
 PULPROG zgpg30  
 TD 65536  
 SOLVENT CDCl3  
 NS 1024  
 DS 4  
 SWH 24038.461 Hz  
 FIDRES 0.366798 Hz  
 AQ 1.3631488 sec  
 RG 190.75  
 DW 20.800 usec  
 DE 6.50 usec  
 TE 298.4 K  
 D1 2.00000000 sec  
 D11 0.03000000 sec  
 TDO 1

===== CHANNEL f1 =====  
 SFO1 100.6228293 MHz  
 NUC1 13C  
 P1 10.00 usec  
 PLW1 48.00000000 W

===== CHANNEL f2 =====  
 SFO2 400.1316005 MHz  
 NUC2 1H  
 CPDPRG[2] waltz16  
 PCPD2 90.00 usec  
 PLW2 13.00000000 W  
 PLW12 0.36111000 W  
 PLW13 0.29249999 W

F2 - Processing parameters  
 SI 32768  
 SF 100.6127687 MHz  
 WDW EM  
 SSB 0  
 LB 1.00 Hz  
 GB 0  
 PC 1.40

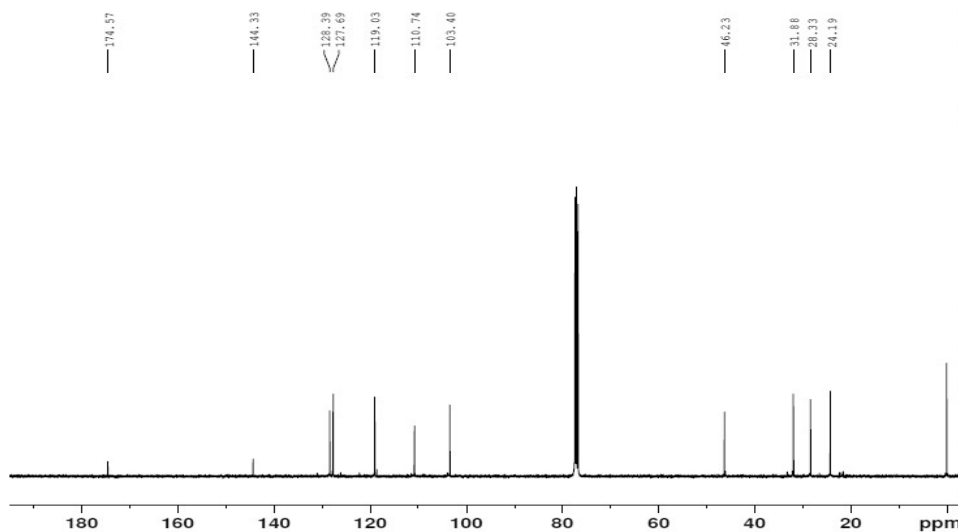

# Compound 14c

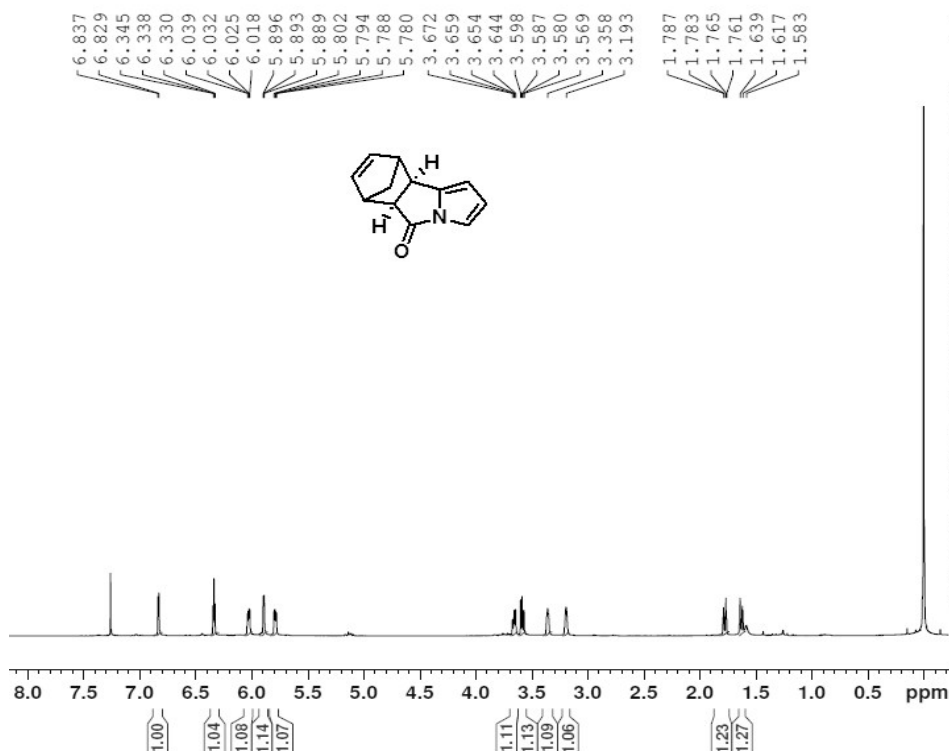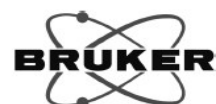

Current Data Parameters  
 NAME TG-153k  
 EXPNO 10  
 PROCNO 1  
 F2 - Acquisition Parameters  
 Date\_ 20171211  
 Time 13.43  
 INSTRUM spect  
 PROBHD 5 mm PABBO BB/  
 PULPROG zg30  
 TD 65536  
 SOLVENT CDCl3  
 NS 12  
 DS 2  
 SWH 8012.820 Hz  
 FIDRES 0.122266 Hz  
 AQ 4.0894465 sec  
 RG 190.75  
 DW 62.400 usec  
 DE 6.50 usec  
 TE 296.8 K  
 D1 1.00000000 sec  
 TD0 1  
 ===== CHANNEL f1 =====  
 SFO1 400.1324710 MHz  
 NUC1 1H  
 P1 15.00 usec  
 PLW1 13.00000000 W  
 F2 - Processing parameters  
 SI 65536  
 SF 400.1300091 MHz  
 WDW EM  
 SSB 0  
 LB 0.30 Hz  
 GB 0  
 PC 1.00

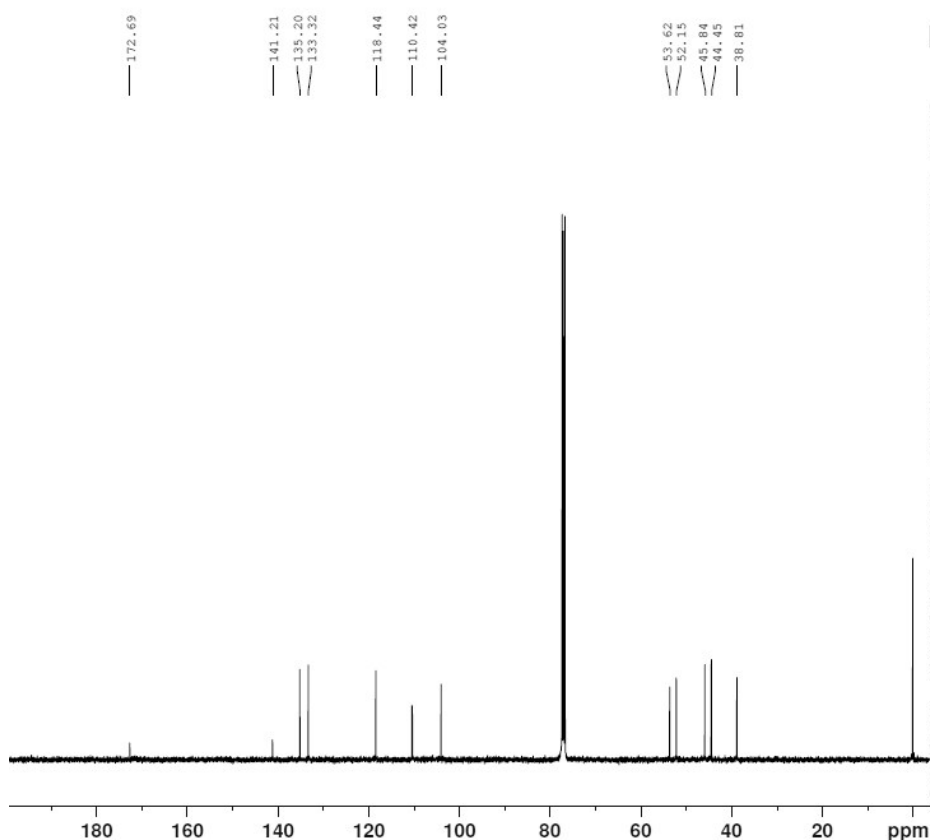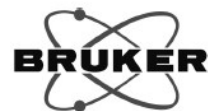

Current Data Parameters  
 NAME TG-153k  
 EXPNO 11  
 PROCNO 1  
 F2 - Acquisition Parameters  
 Date\_ 20171211  
 Time 14.42  
 INSTRUM spect  
 PROBHD 5 mm PABBO BB/  
 PULPROG zgpg30  
 TD 65536  
 SOLVENT CDCl3  
 NS 1024  
 DS 4  
 SWH 24038.461 Hz  
 FIDRES 0.366798 Hz  
 AQ 1.3631488 sec  
 RG 190.75  
 DW 20.800 usec  
 DE 6.50 usec  
 TE 299.3 K  
 D1 2.00000000 sec  
 D11 0.03000000 sec  
 TD0 1  
 ===== CHANNEL f1 =====  
 SFO1 100.6228293 MHz  
 NUC1 13C  
 P1 10.00 usec  
 PLW1 48.00000000 W  
 ===== CHANNEL f2 =====  
 SFO2 400.1316005 MHz  
 NUC2 1H  
 CPDPRG[2] waltz16  
 PCPD2 90.00 usec  
 PLW2 13.00000000 W  
 PLW12 0.36111000 W  
 PLW13 0.29249999 W  
 F2 - Processing parameters  
 SI 32768  
 SF 100.6127681 MHz  
 WDW EM  
 SSB 0  
 LB 1.00 Hz  
 GB 0  
 PC 1.40



# Compound 14d

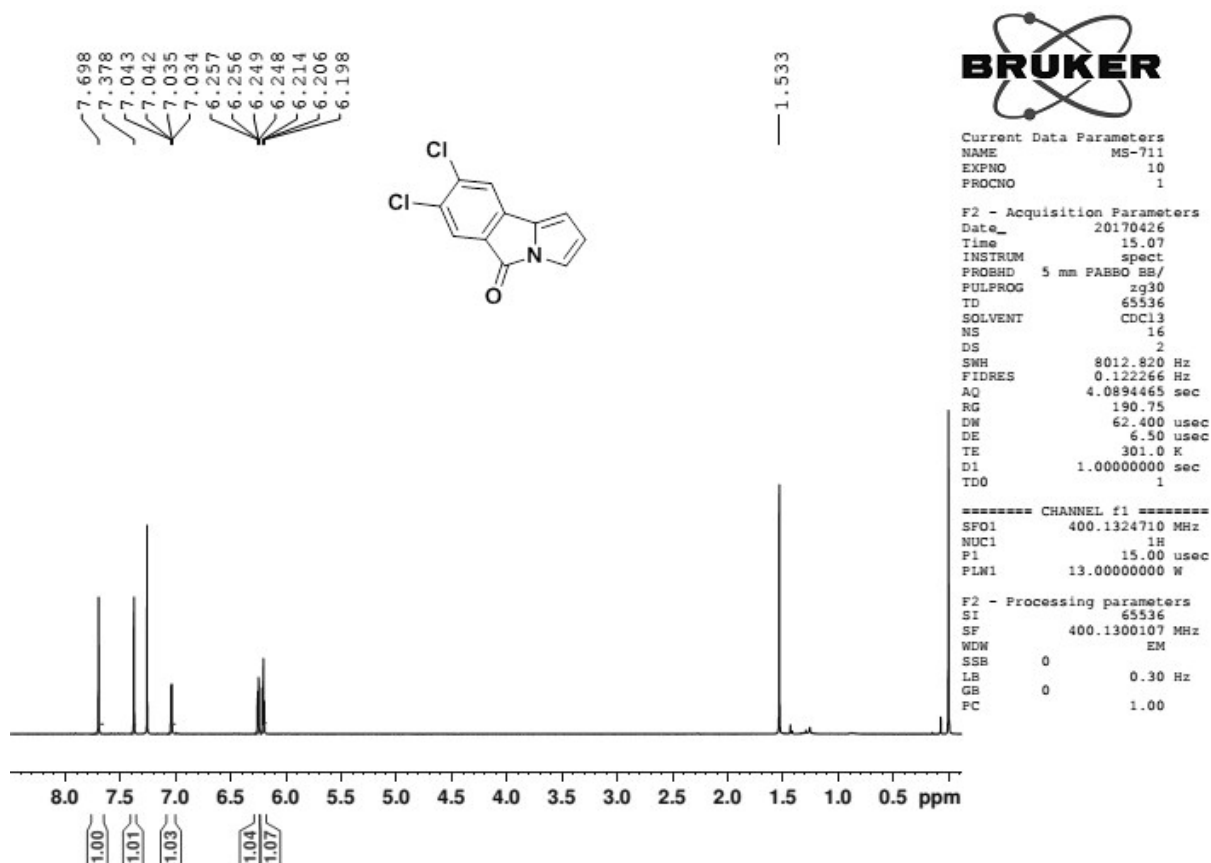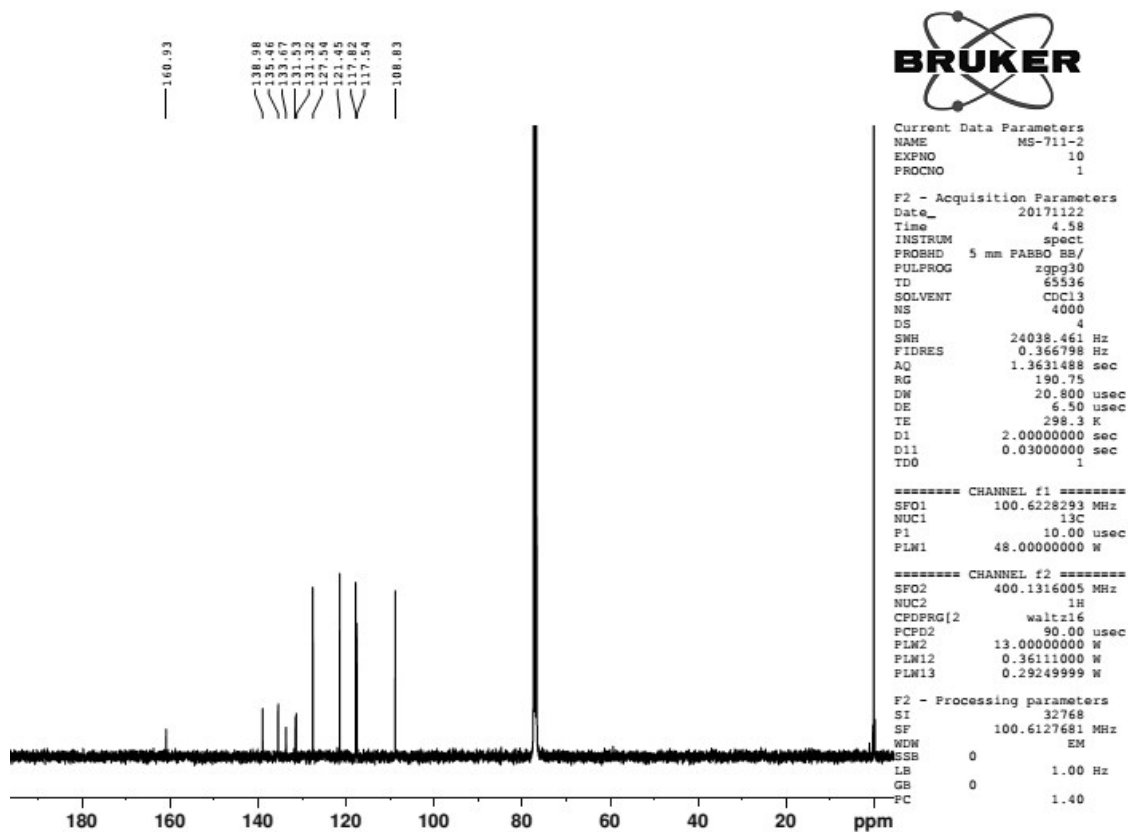

Compound **14e**

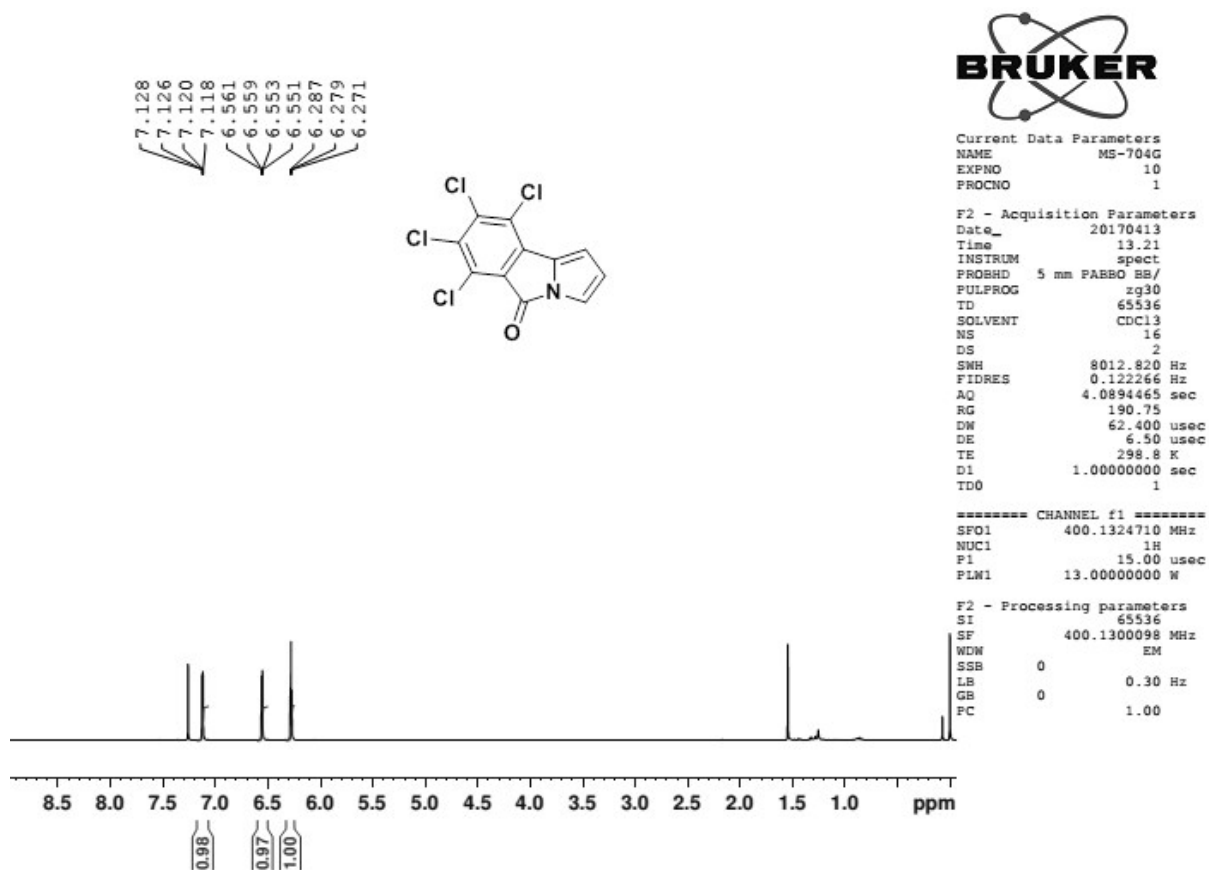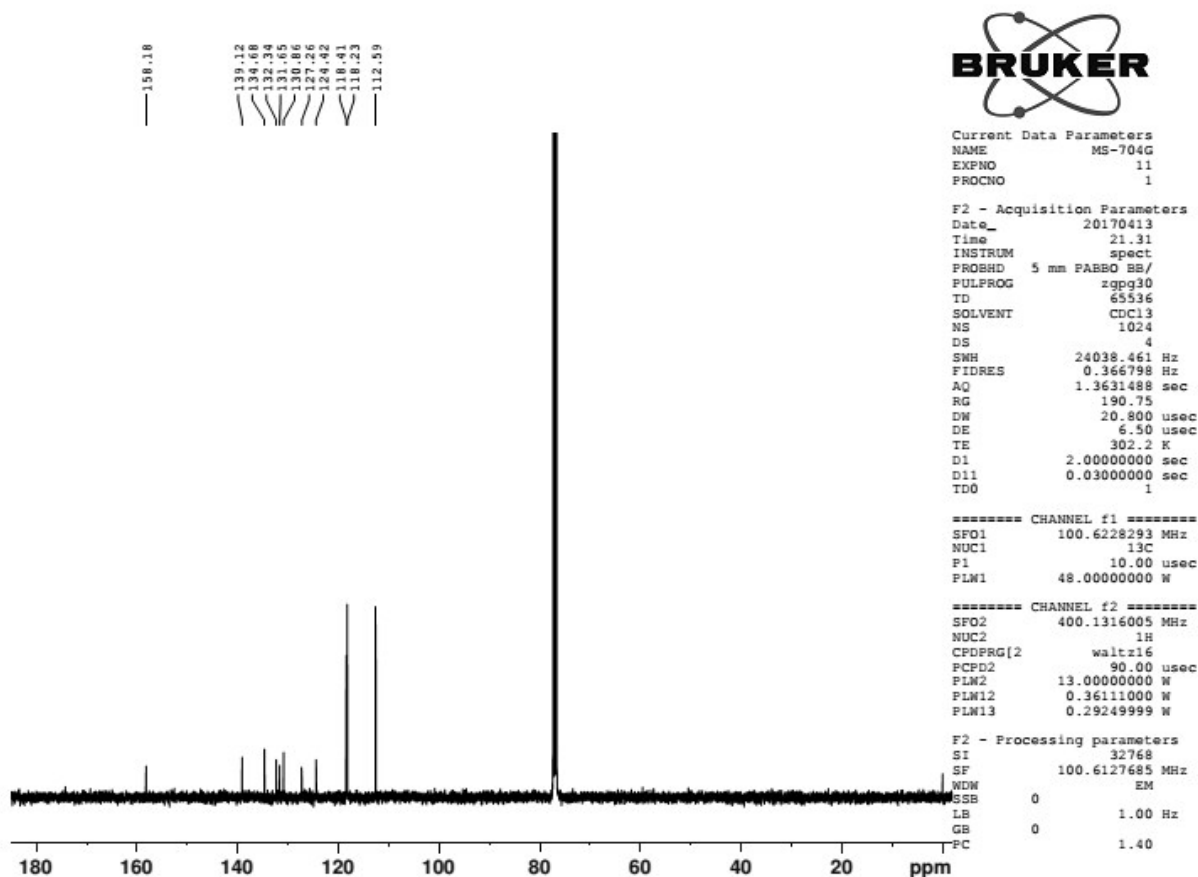

Compound **14f**

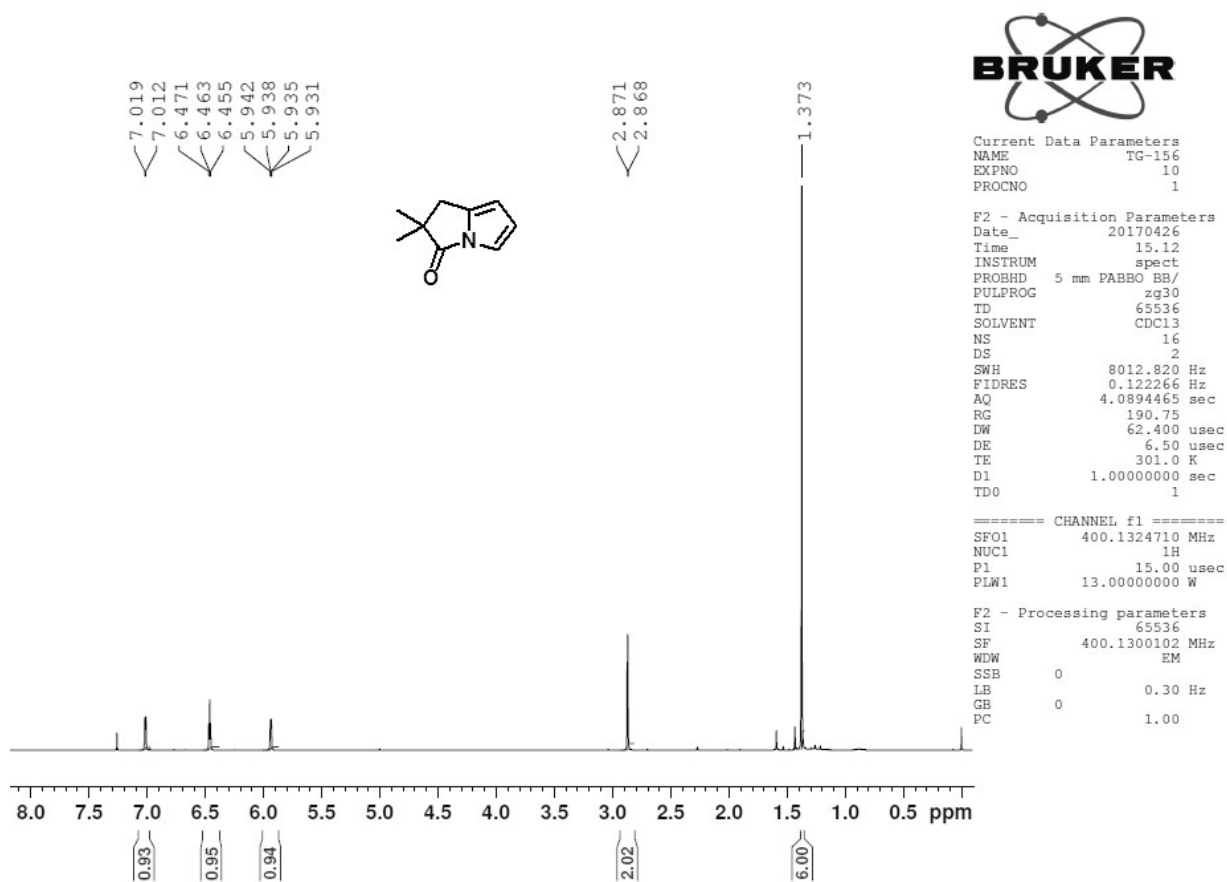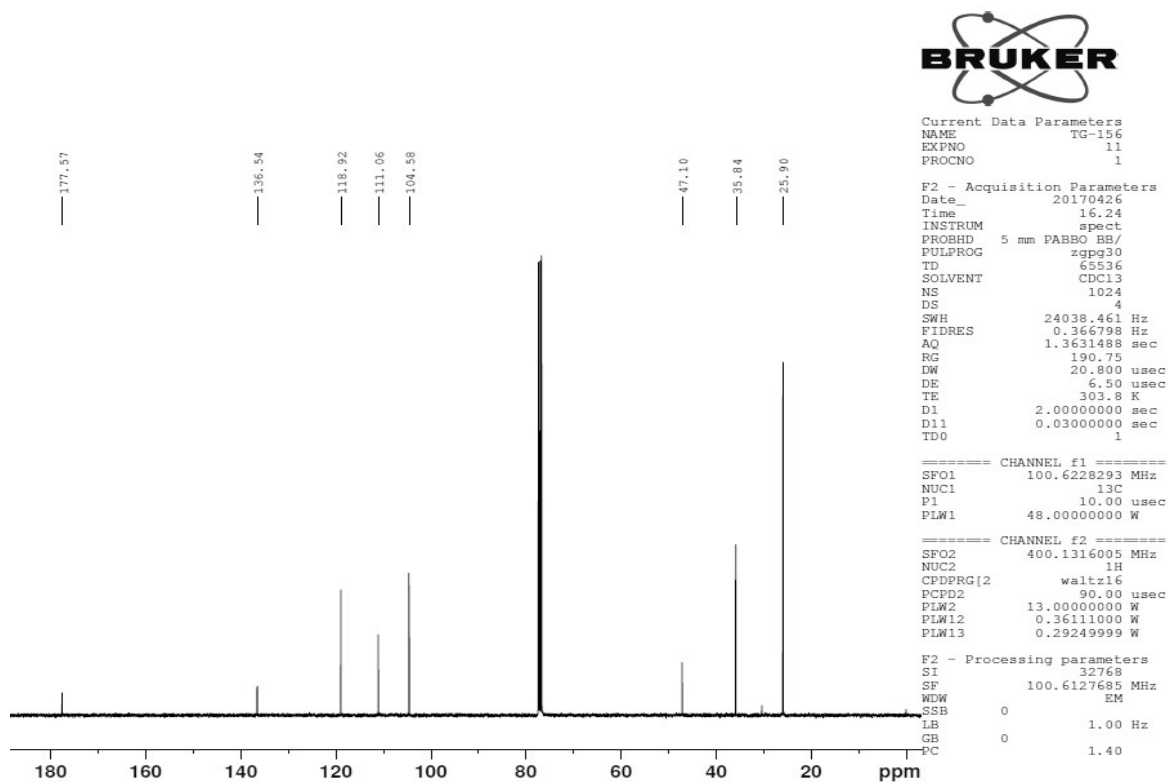

TG-156 14 1 /opt/topspin3.2/data/nmr/su/nmr

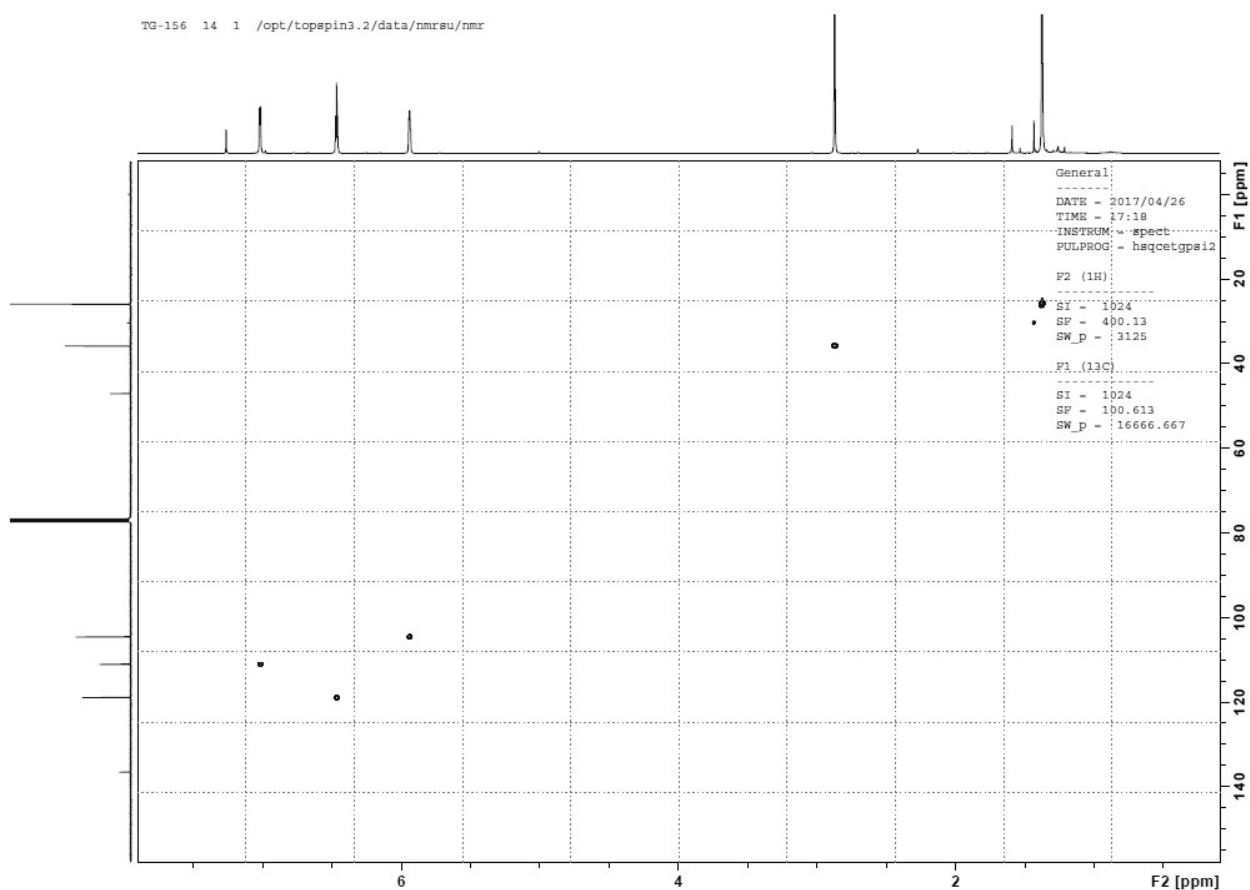

TG-156 12 1 /opt/topspin3.2/data/nmr/su/nmr

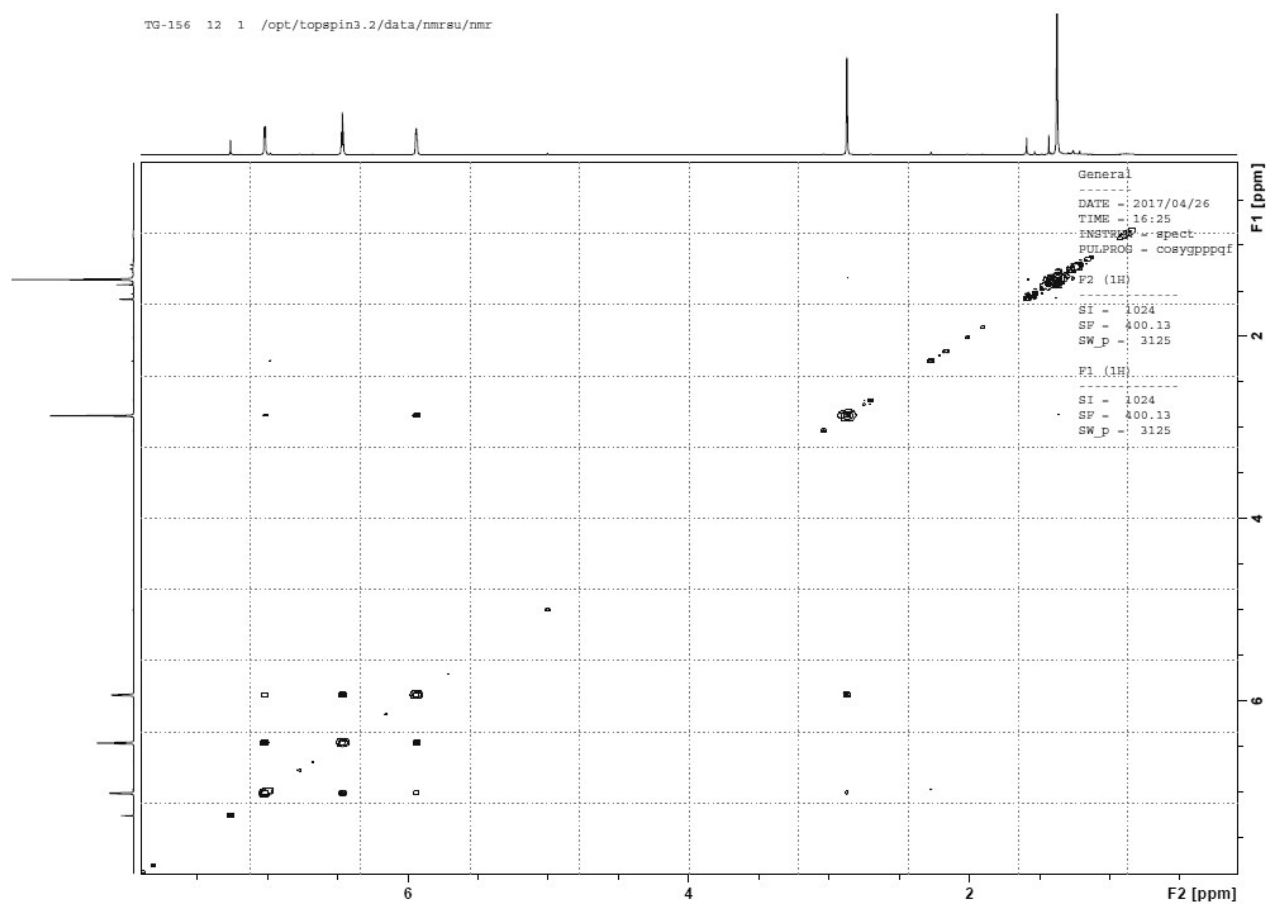

TG-156 13 1 /opt/topspin3.2/data/nmr5u/nmr

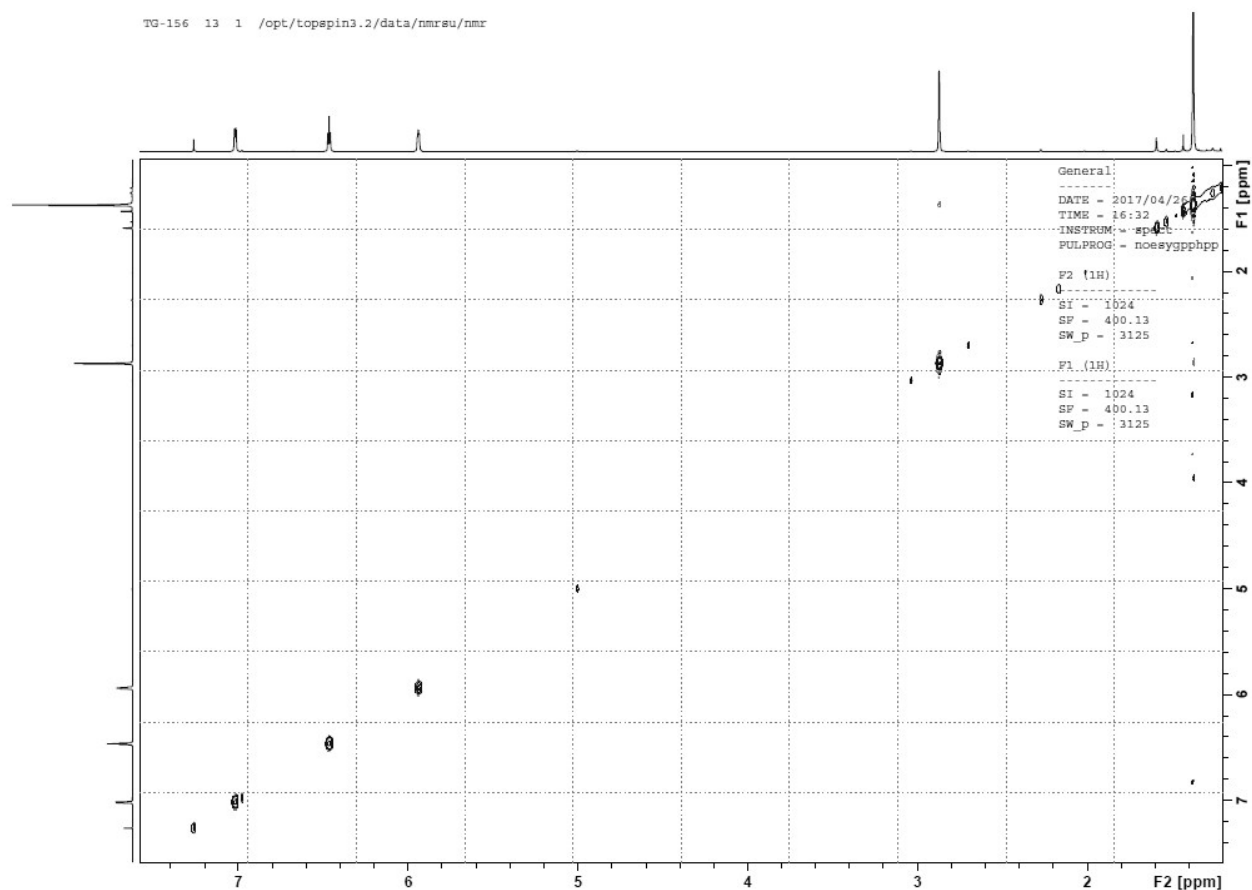

TG-156 15 1 /opt/topspin3.2/data/nmr5u/nmr

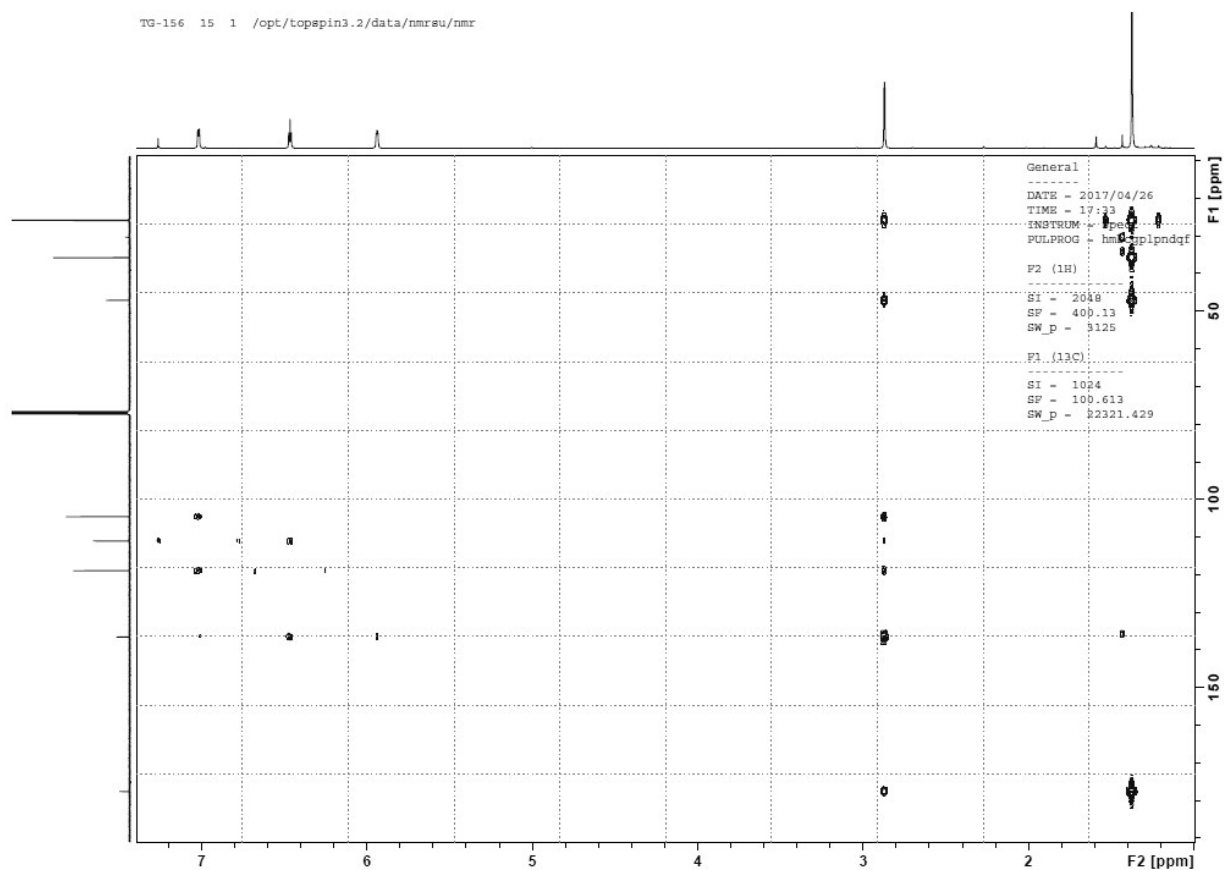

# Compound 14g

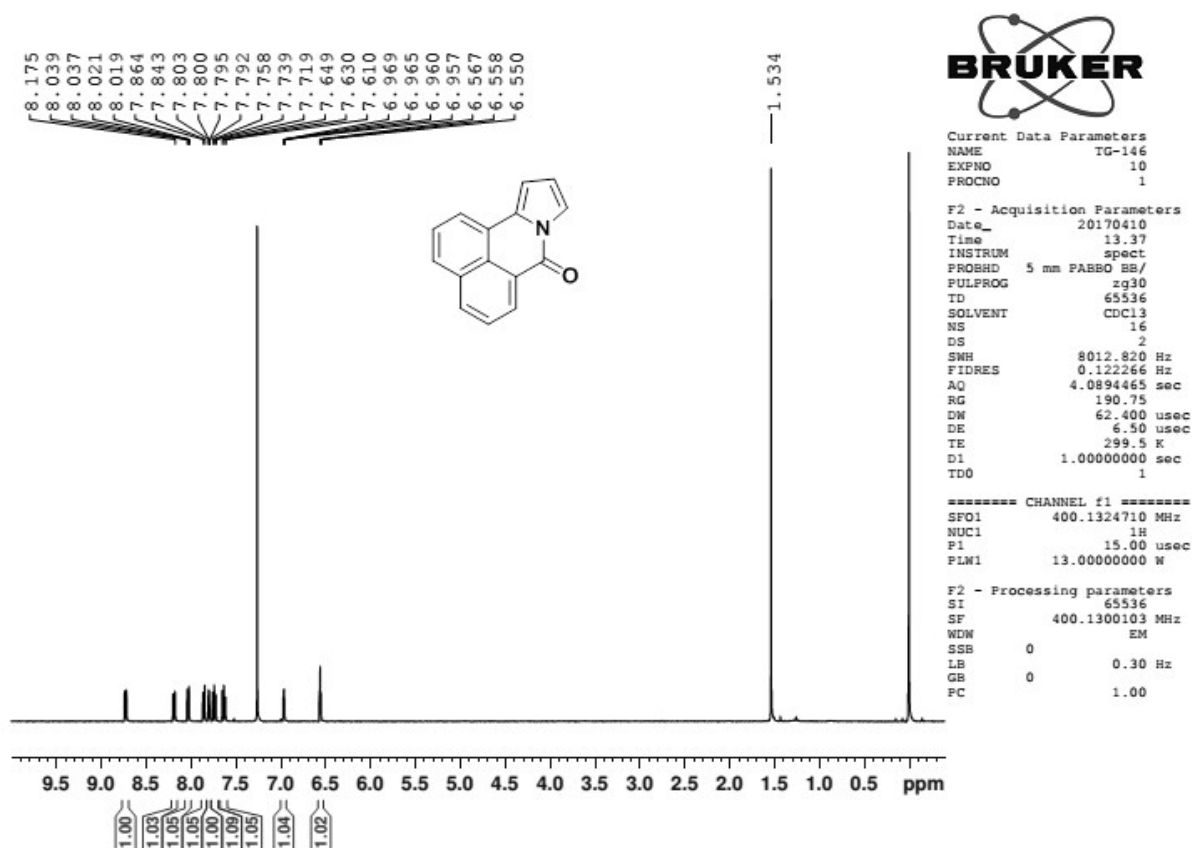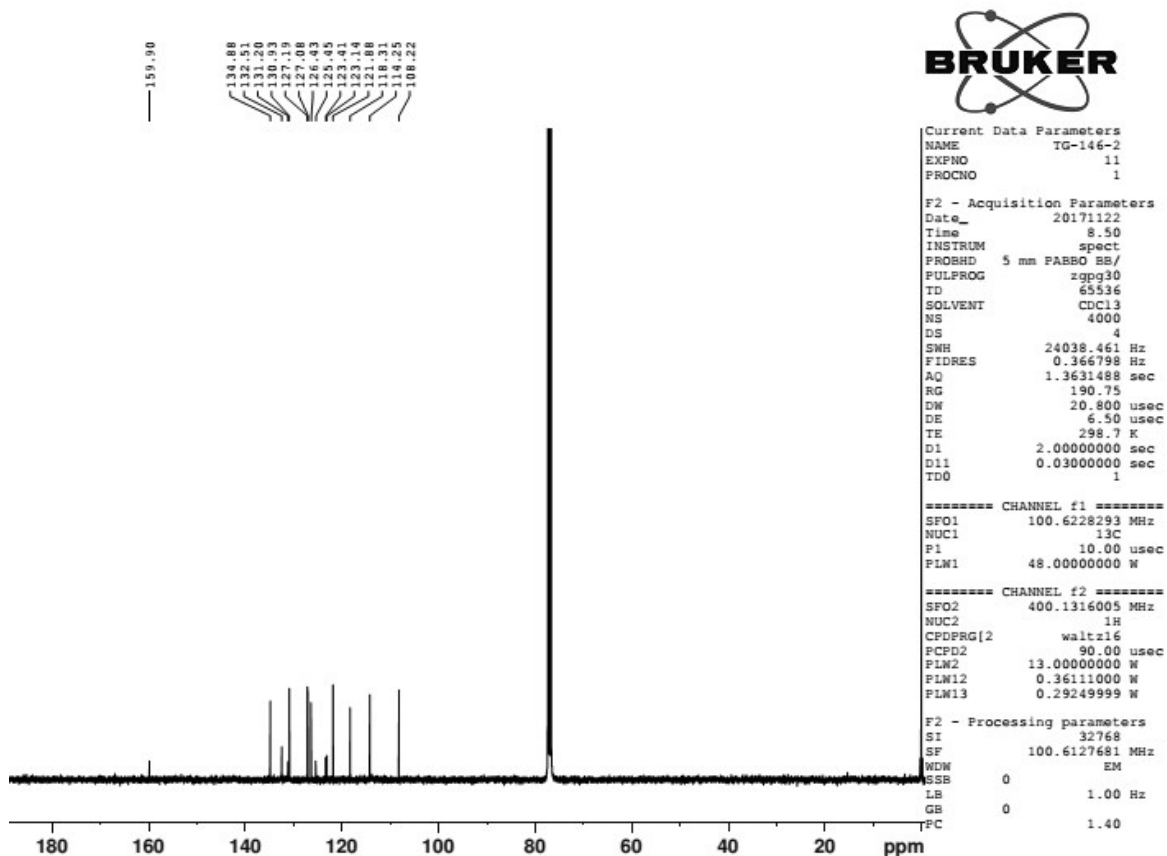

# Compound 14h

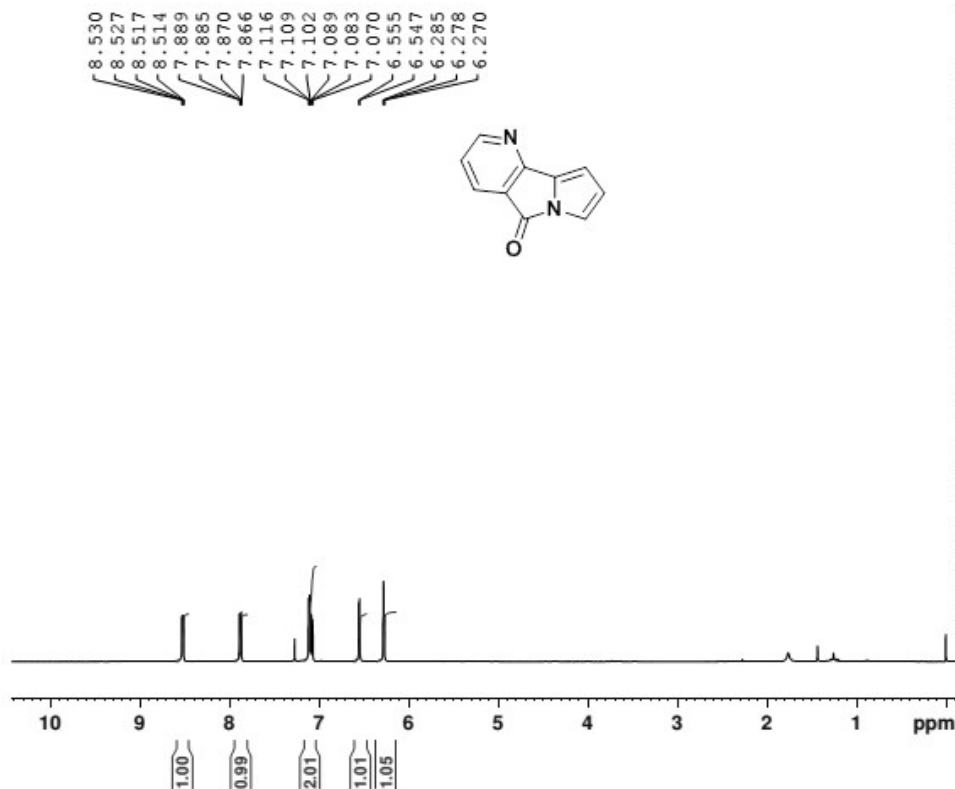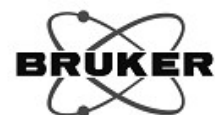

Current Data Parameters  
NAME MS-719  
EXPNO 10  
PROCNO 1

F2 - Acquisition Parameters  
Date\_ 20170508  
Time 5.50  
INSTRUM spect  
PROBHD 5 mm PABBO BB/  
PULPROG zg30  
TD 65536  
SOLVENT CDCl3  
NS 16  
DS 2  
SWH 8012.820 Hz  
FIDRES 0.122266 Hz  
AQ 4.0894465 sec  
RG 190.75  
DW 62.400 usec  
DE 6.50 usec  
TE 296.3 K  
D1 1.00000000 sec  
TD0 1

===== CHANNEL f1 =====  
SFO1 400.1324710 MHz  
NUC1 1H  
P1 15.00 usec  
PLW1 13.00000000 W

F2 - Processing parameters  
SI 65536  
SF 400.1300051 MHz  
WDW EM  
SSB 0  
LB 0.30 Hz  
GB 0  
PC 1.00

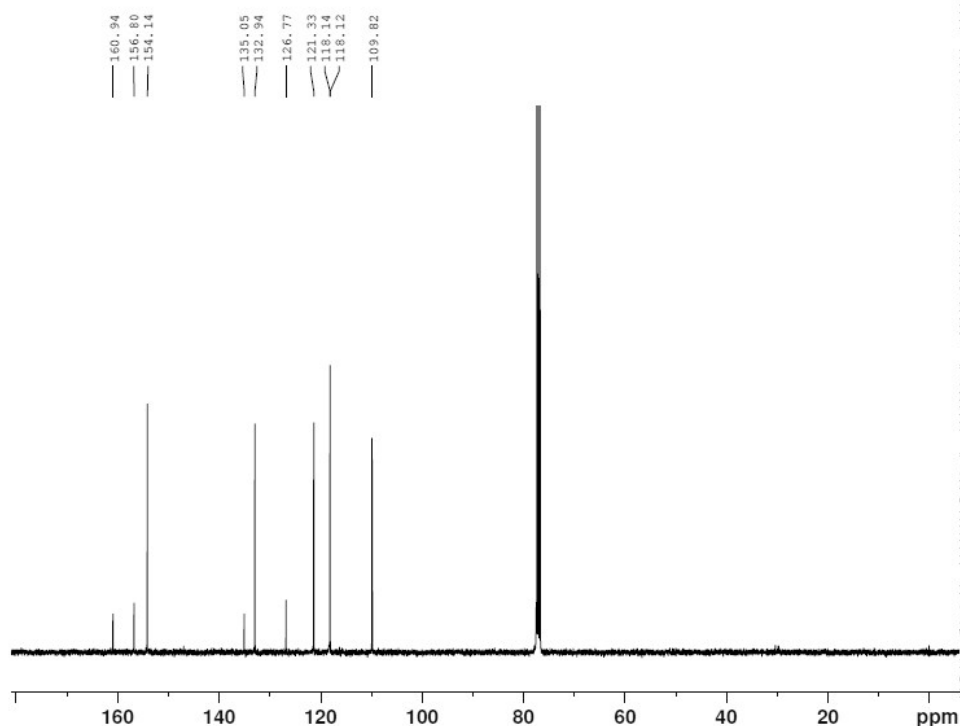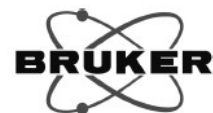

Current Data Parameters  
NAME MS-719  
EXPNO 11  
PROCNO 1

F2 - Acquisition Parameters  
Date\_ 20170508  
Time 6.49  
INSTRUM spect  
PROBHD 5 mm PABBO BB/  
PULPROG zgpg30  
TD 65536  
SOLVENT CDCl3  
NS 1024  
DS 4  
SWH 24038.461 Hz  
FIDRES 0.366798 Hz  
AQ 1.3631488 sec  
RG 190.75  
DW 20.800 usec  
DE 6.50 usec  
TE 298.9 K  
D1 2.00000000 sec  
D11 0.03000000 sec  
TD0 1

===== CHANNEL f1 =====  
SFO1 100.6228293 MHz  
NUC1 13C  
P1 10.00 usec  
PLW1 48.00000000 W

===== CHANNEL f2 =====  
SFO2 400.1316005 MHz  
NUC2 1H  
CPDPRG[2] waltz16  
PCPD2 90.00 usec  
PLW2 13.00000000 W  
PLW12 0.36111000 W  
PLW13 0.29249999 W

F2 - Processing parameters  
SI 32768  
SF 100.6127685 MHz  
WDW EM  
SSB 0  
LB 1.00 Hz  
GB 0  
PC 1.40

MS-719 14 1 /opt/topspin3.2/data/nmrnu/nmr

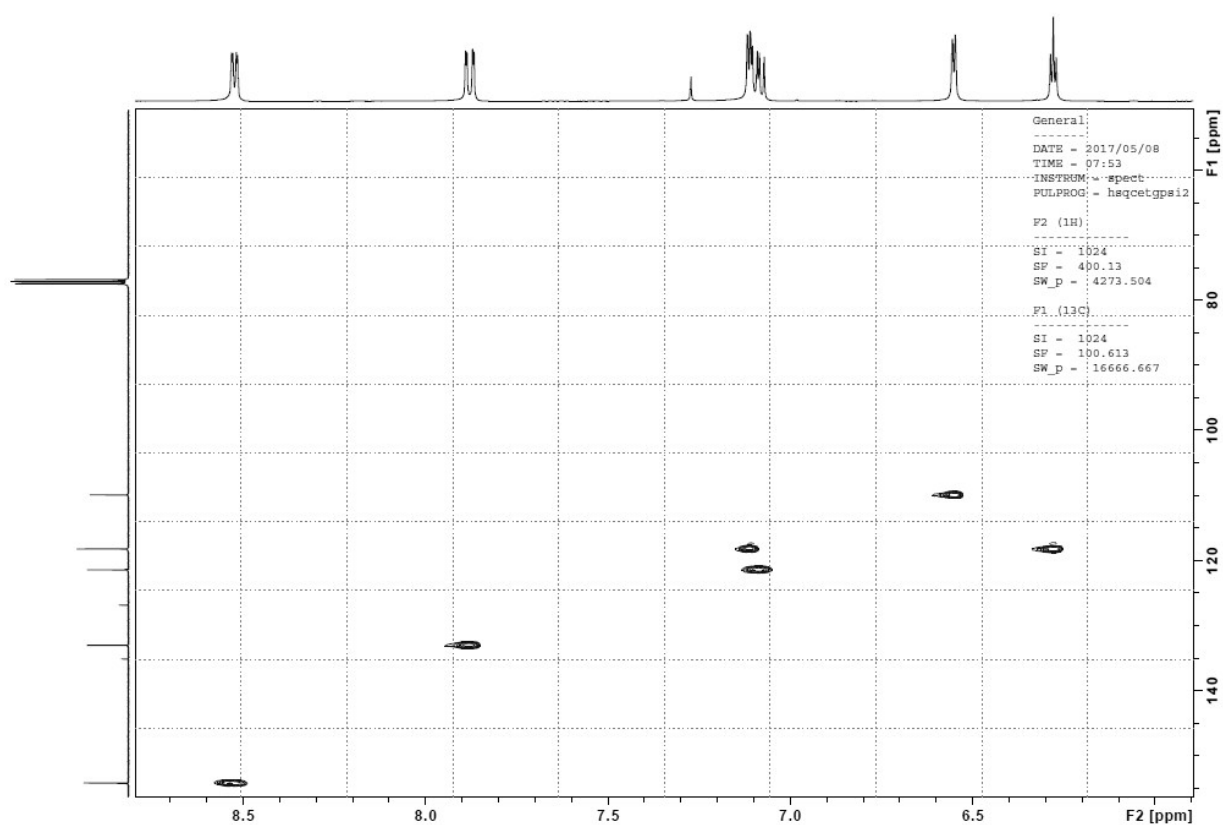

MS-719 15 1 /opt/topspin3.2/data/nmrnu/nmr

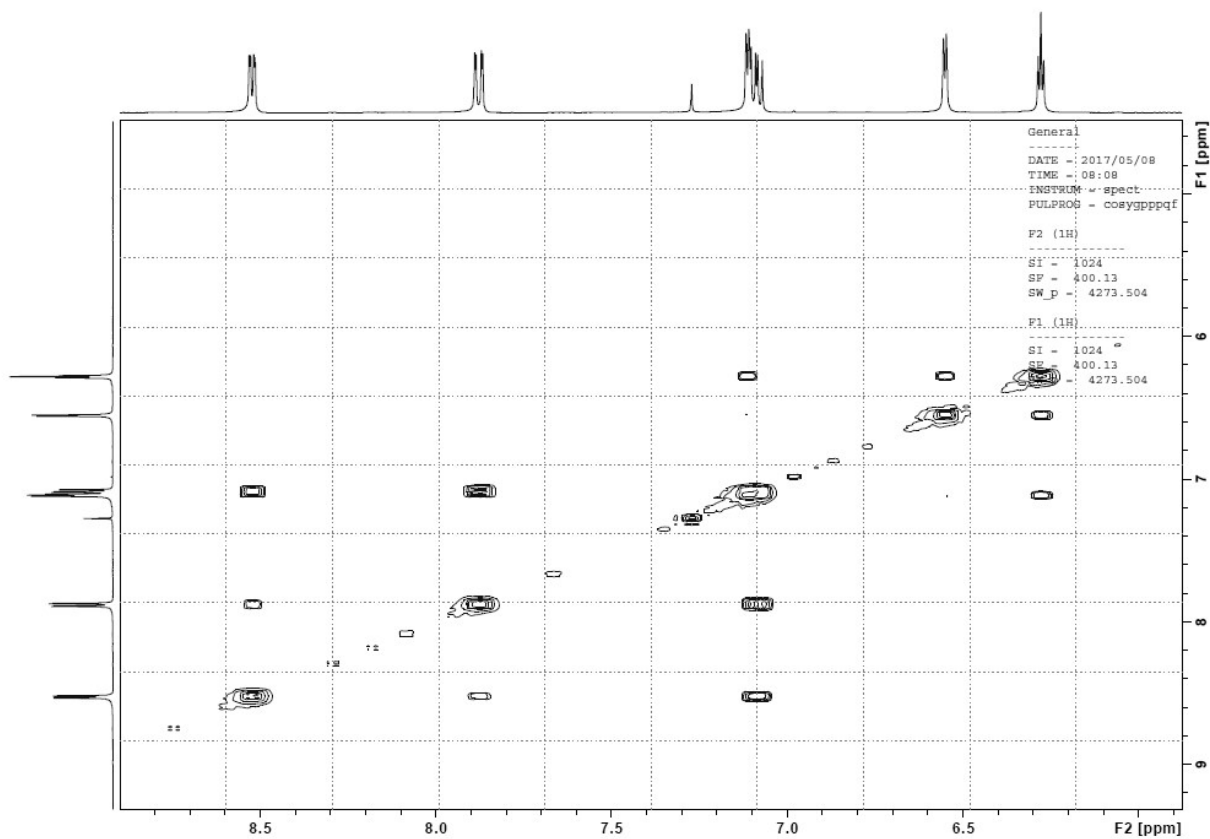



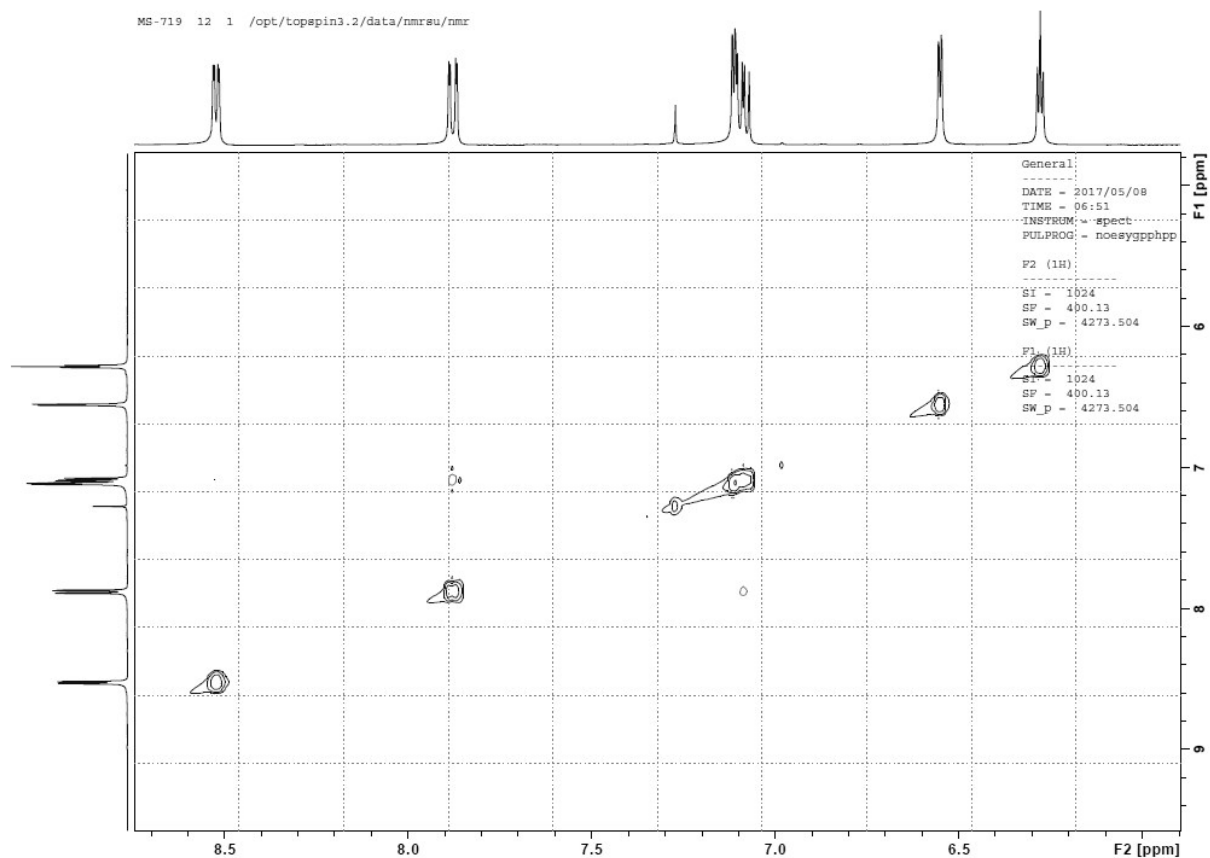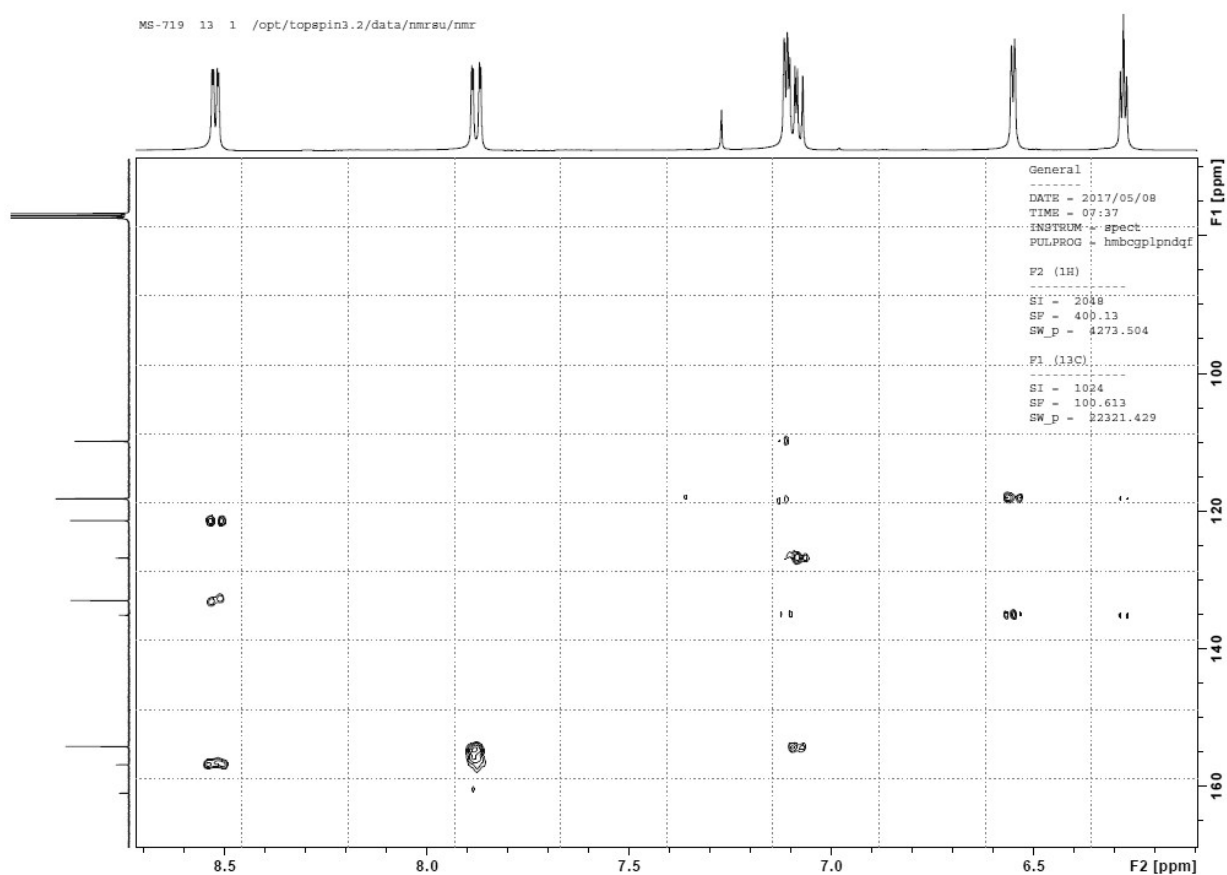

# Compound 14i

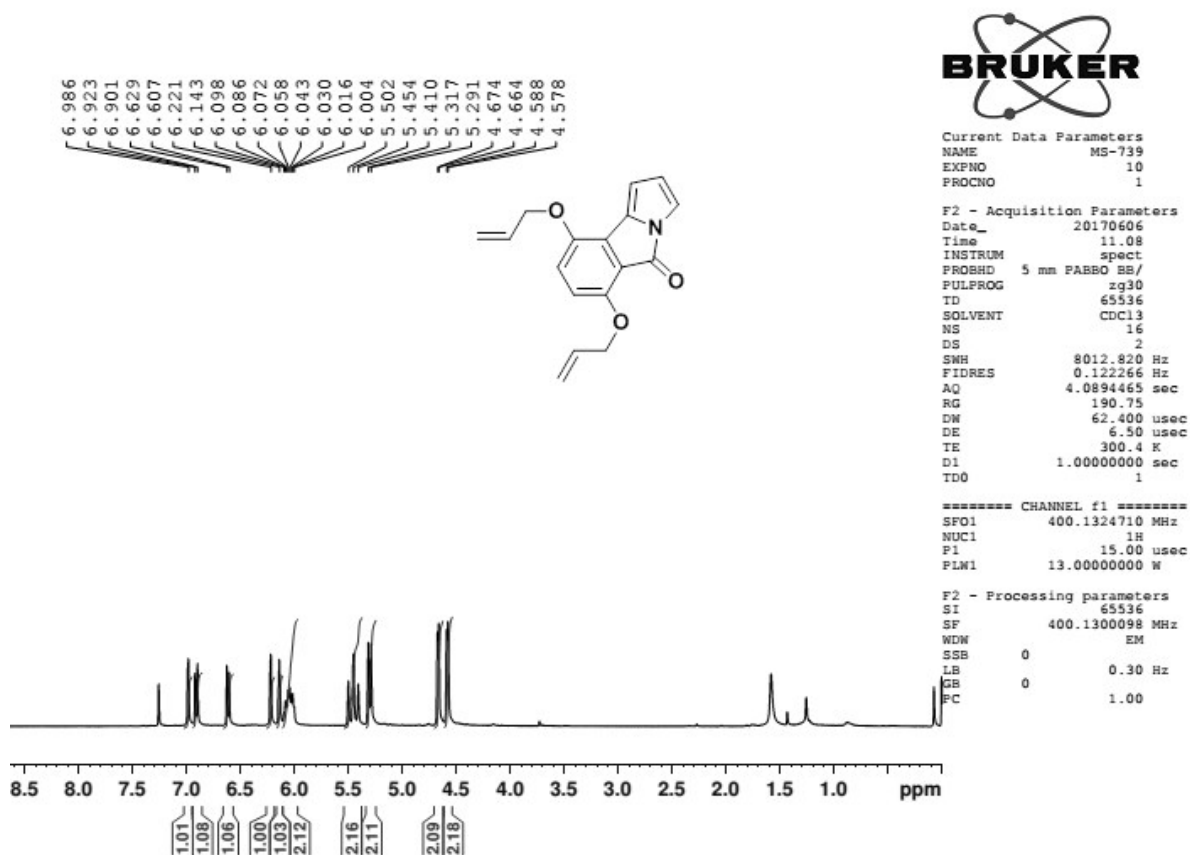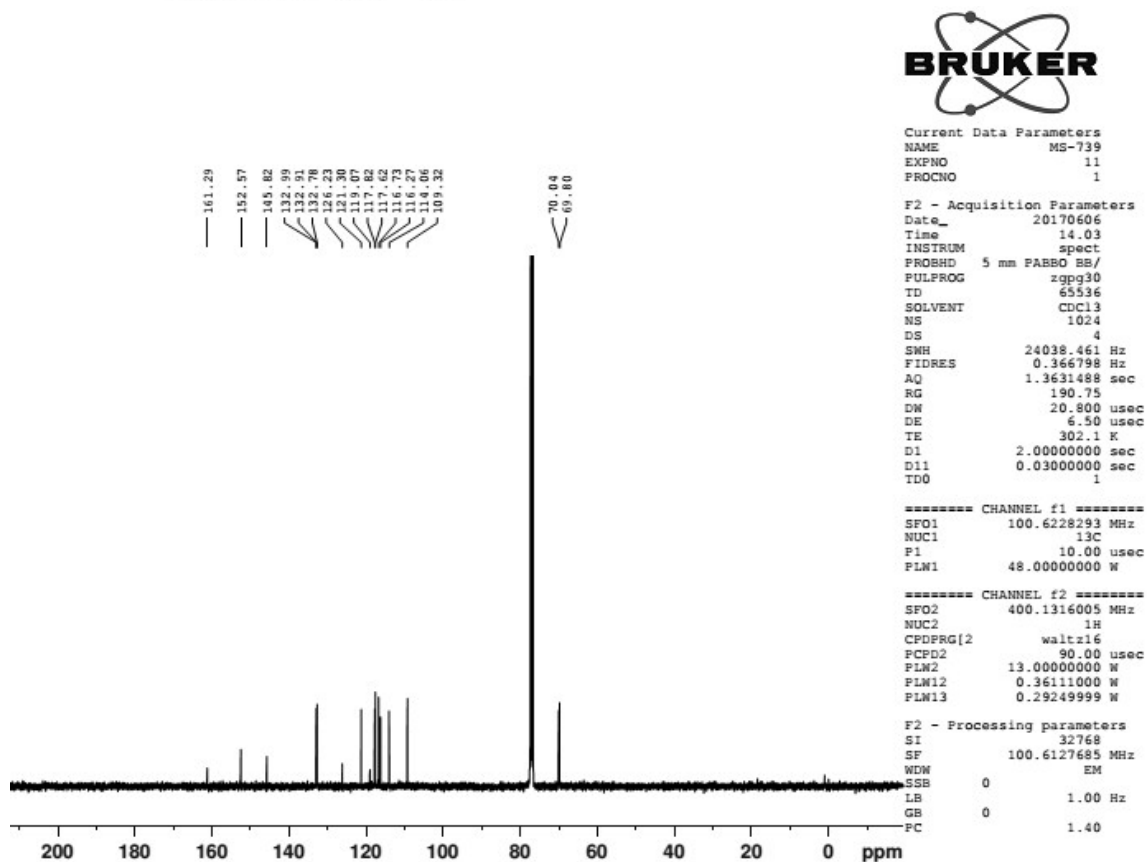

Compound **14j**

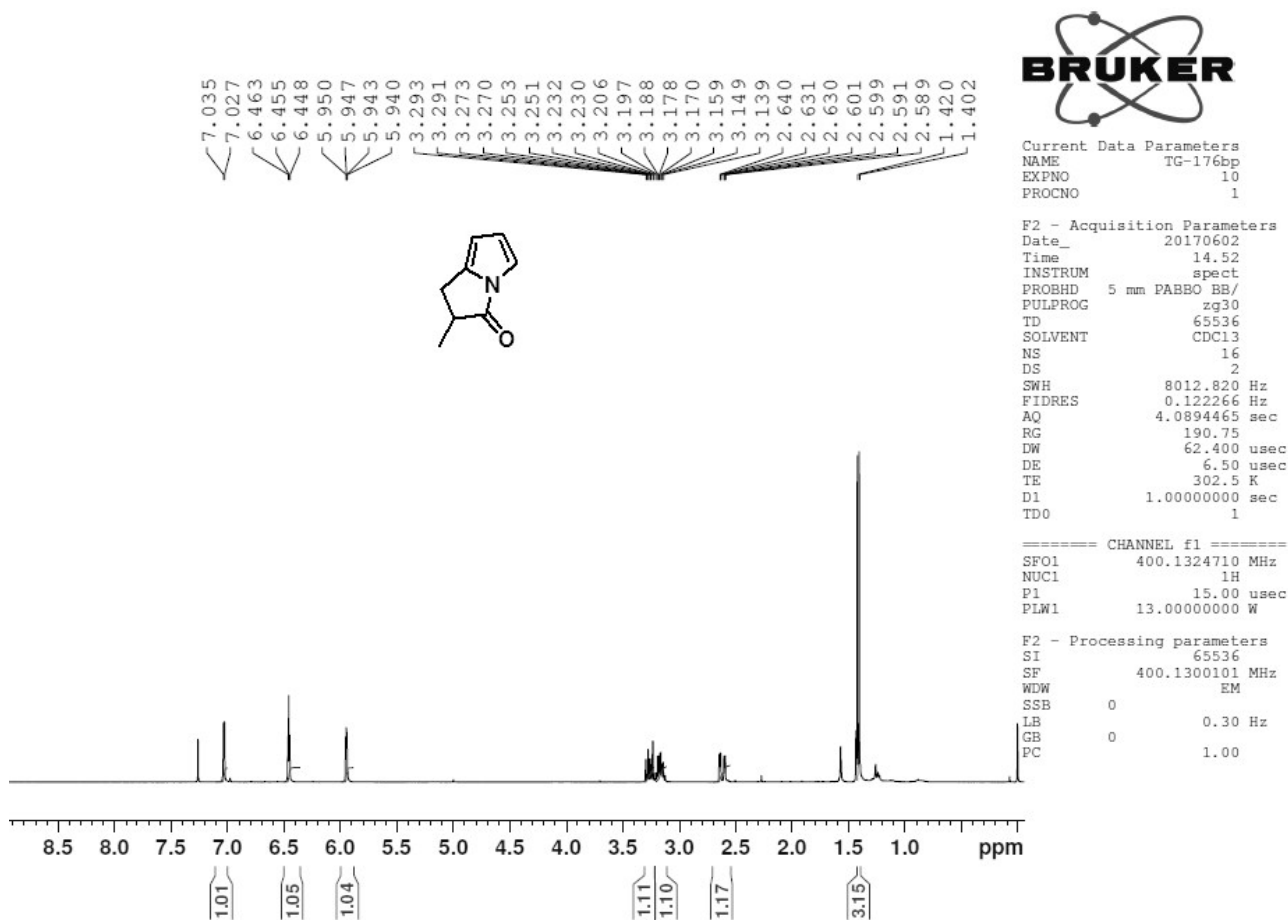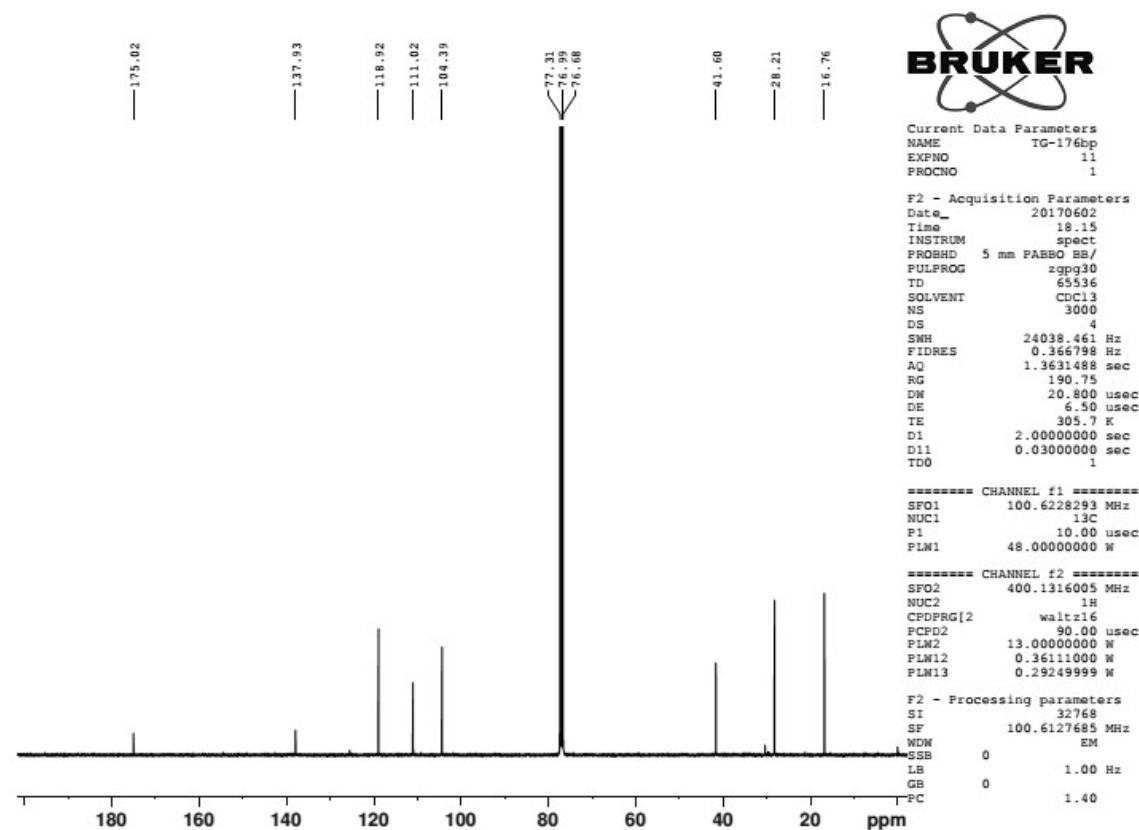

# Compound 14k

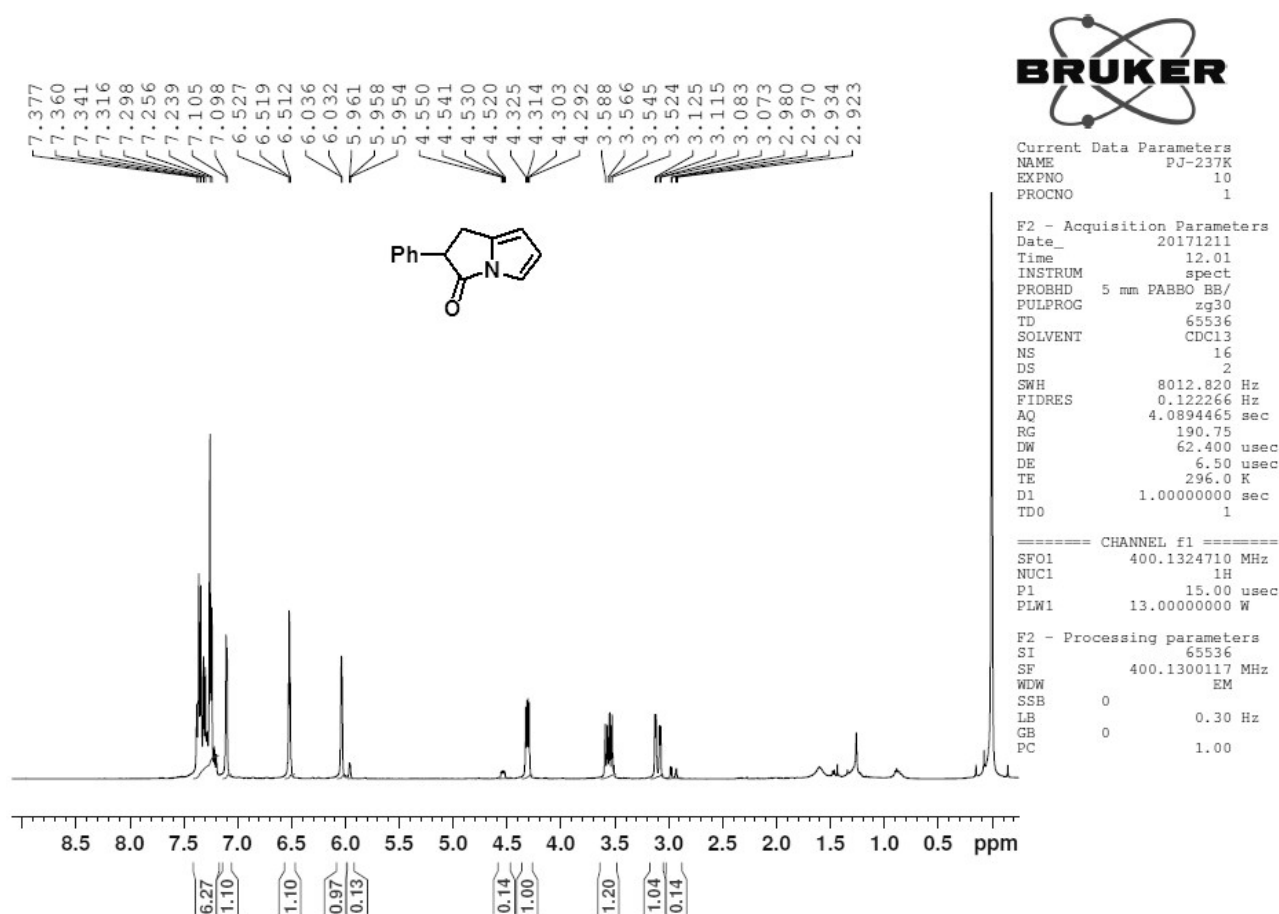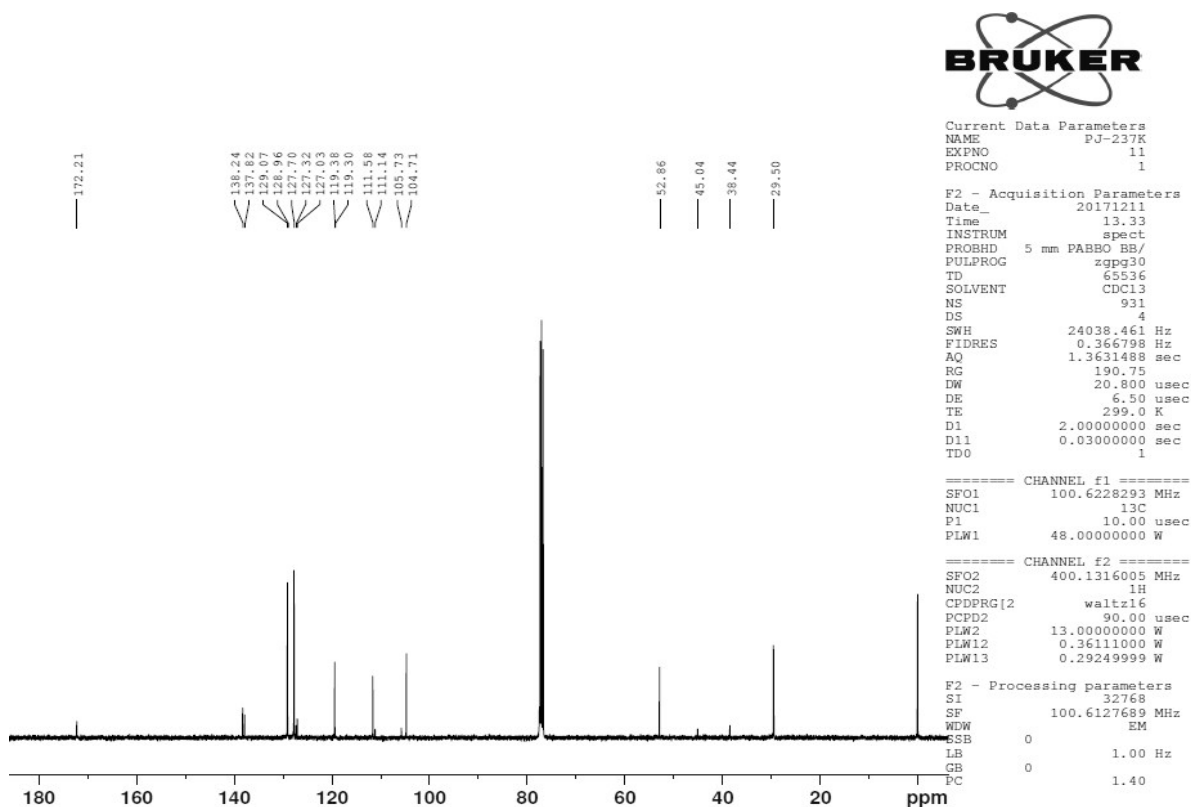

# Compound 14l

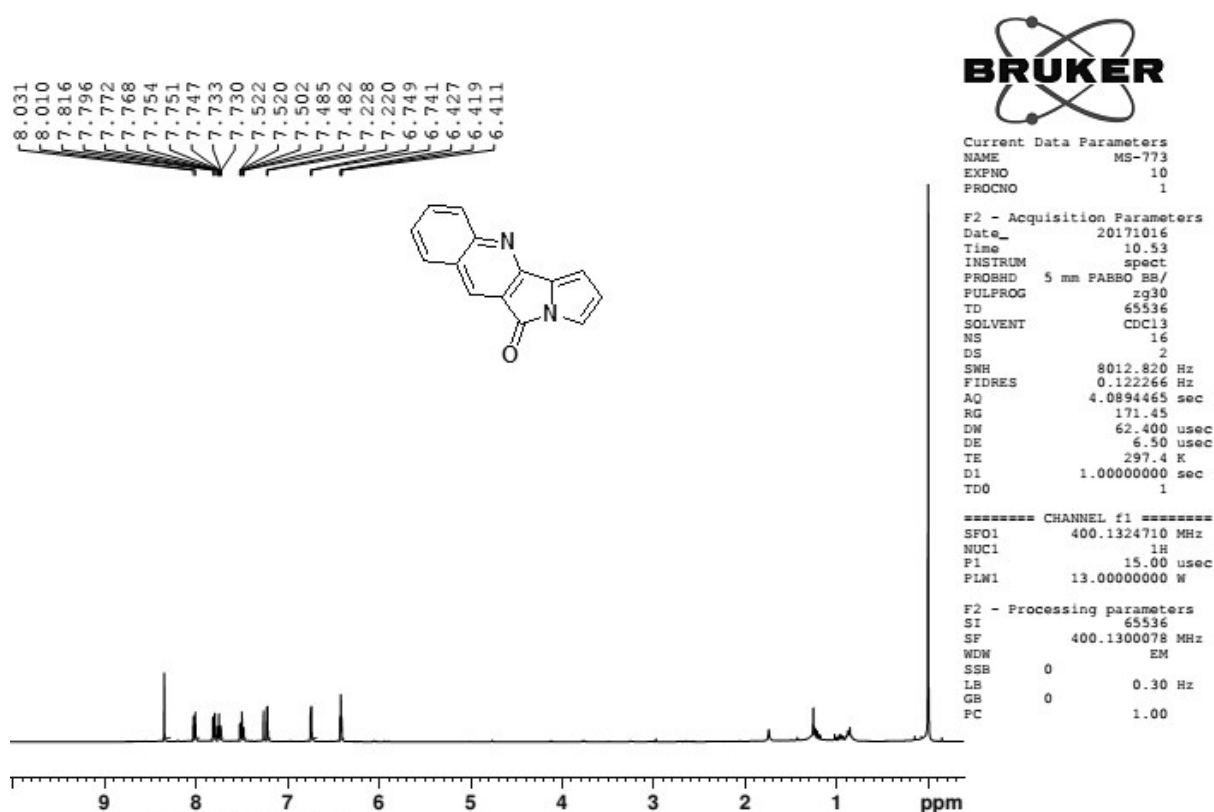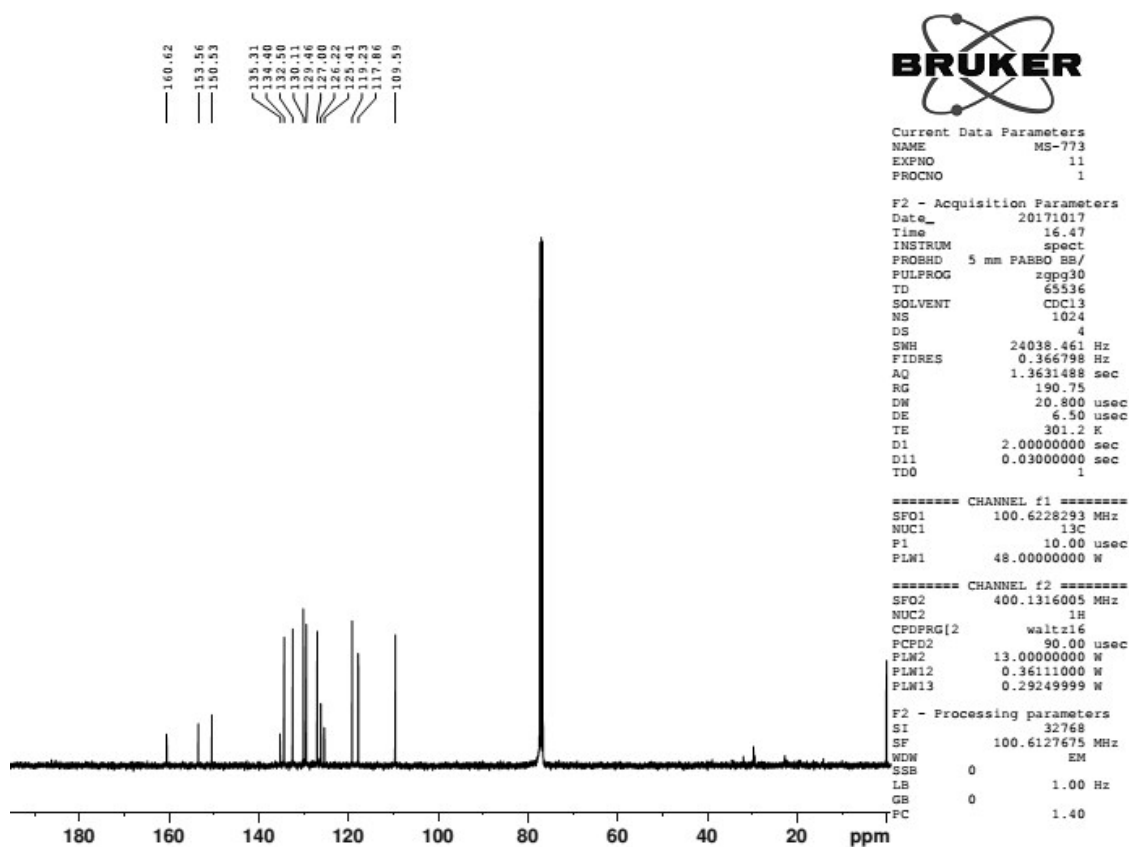

Compound **14m**

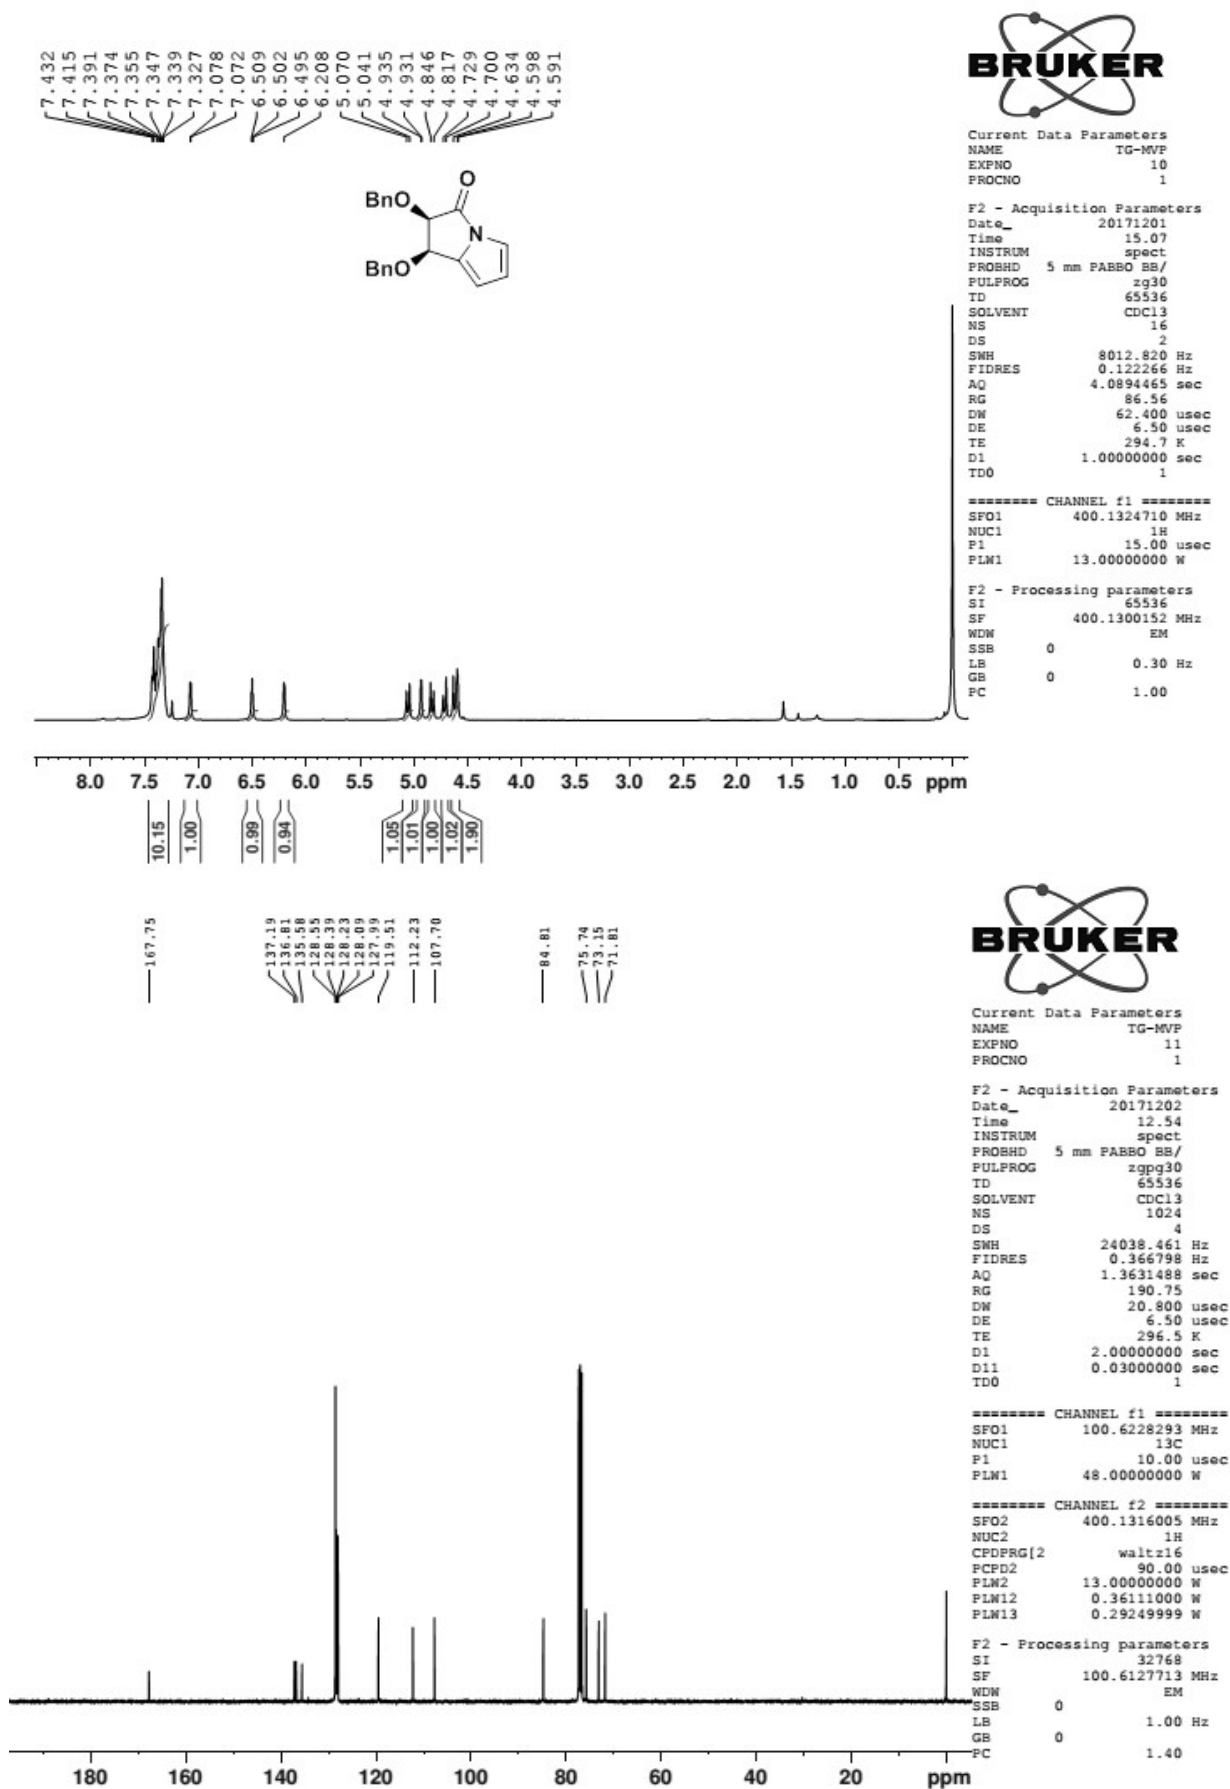

# Compound 14n

7.357  
7.353  
7.344  
7.336  
7.331  
7.322  
7.077  
7.076  
7.069  
6.508  
6.500  
6.492  
6.206  
6.203  
6.201  
6.198  
5.067  
5.038  
4.937  
4.935  
4.930  
4.928  
4.847  
4.818  
4.728  
4.699  
4.637  
4.608  
4.596  
4.589

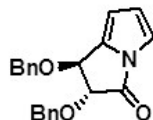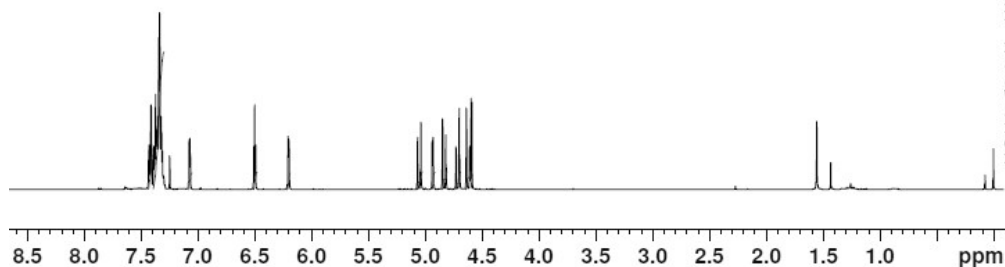

1.99  
8.02  
0.96  
1.00  
0.98  
1.04  
1.00  
1.05  
1.07  
1.07  
0.96

167.74  
137.25  
136.87  
135.63  
128.55  
128.35  
128.22  
128.08  
127.98  
119.48  
112.24  
107.70  
84.87  
75.79  
73.17  
71.82

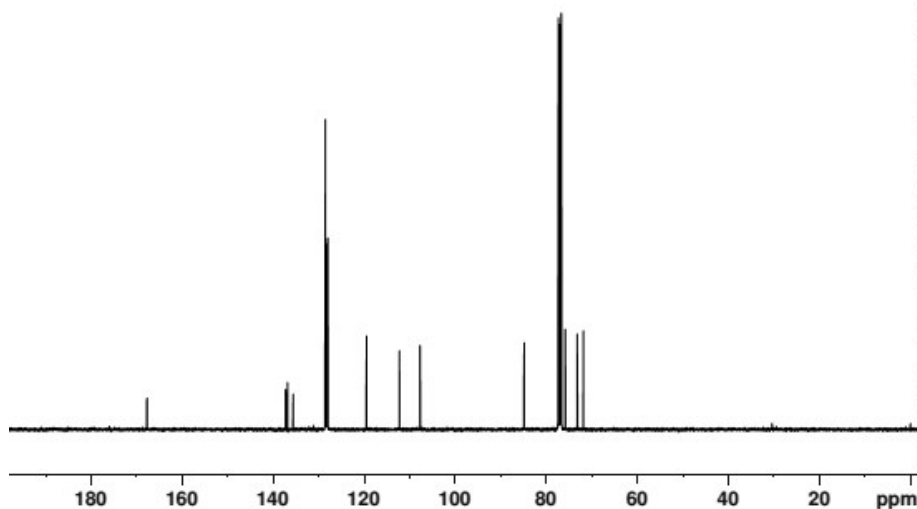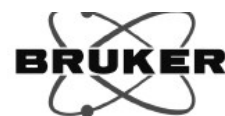

Current Data Parameters  
NAME TG-181  
EXPNO 16  
PROCNO 1

F2 - Acquisition Parameters  
Date\_ 20170616  
Time 9.50  
INSTRUM spect  
PROBHD 5 mm PABBO BB/  
PULPROG zg30  
TD 65536  
SOLVENT CDCl3  
NS 8  
DS 2  
SWH 8012.820 Hz  
FIDRES 0.122266 Hz  
AQ 4.089465 sec  
RG 190.75  
DW 62.400 usec  
DE 6.50 usec  
TE 301.4 K  
D1 1.00000000 sec  
TD0 1

===== CHANNEL f1 =====  
SFO1 400.1324710 MHz  
NUC1 1H  
P1 15.00 usec  
PLW1 13.00000000 W

F2 - Processing parameters  
SI 65536  
SF 400.1300147 MHz  
WDW EM  
SSB 0  
LB 0.30 Hz  
GB 0  
PC 1.00

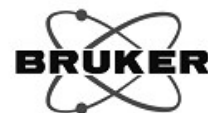

Current Data Parameters  
NAME TG-181  
EXPNO 11  
PROCNO 1

F2 - Acquisition Parameters  
Date\_ 20170612  
Time 18.51  
INSTRUM spect  
PROBHD 5 mm PABBO BB/  
PULPROG zgpg30  
TD 65536  
SOLVENT CDCl3  
NS 1024  
DS 4  
SWH 24038.461 Hz  
FIDRES 0.366798 Hz  
AQ 1.3631488 sec  
RG 190.75  
DW 20.800 usec  
DE 6.50 usec  
TE 304.6 K  
D1 2.00000000 sec  
D11 0.03000000 sec  
TD0 1

===== CHANNEL f1 =====  
SFO1 100.6228293 MHz  
NUC1 13C  
P1 10.00 usec  
PLM1 48.00000000 W

===== CHANNEL f2 =====  
SFO2 400.1316005 MHz  
NUC2 1H  
CFDPRG[2] waltz16  
PCPD2 90.00 usec  
PLM2 13.00000000 W  
PLM12 0.36111000 W  
PLM13 0.29249999 W

F2 - Processing parameters  
SI 32768  
SF 100.6127685 MHz  
WDW EM  
SSB 0  
LB 1.00 Hz  
GB 0  
PC 1.40

# Compound 14o

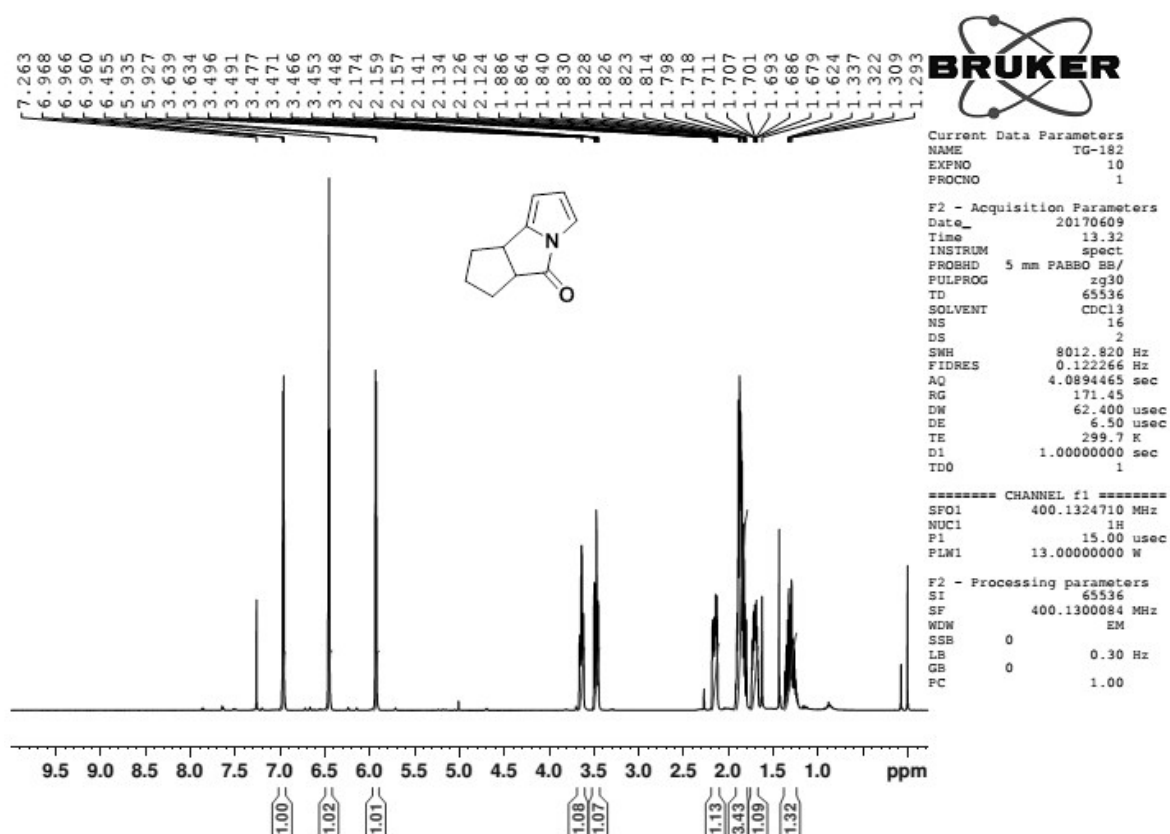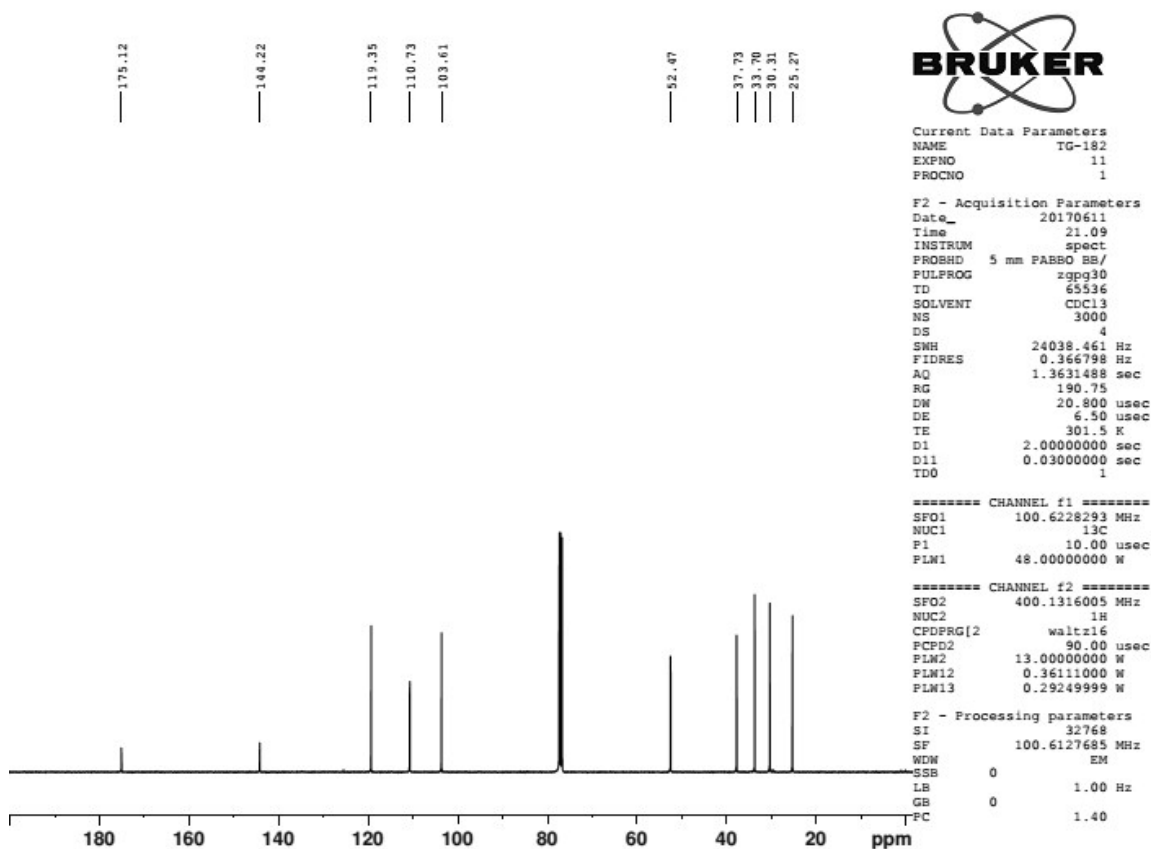



TG-182 14 1 /opt/topepin3.2/data/nmr/nu/nmr

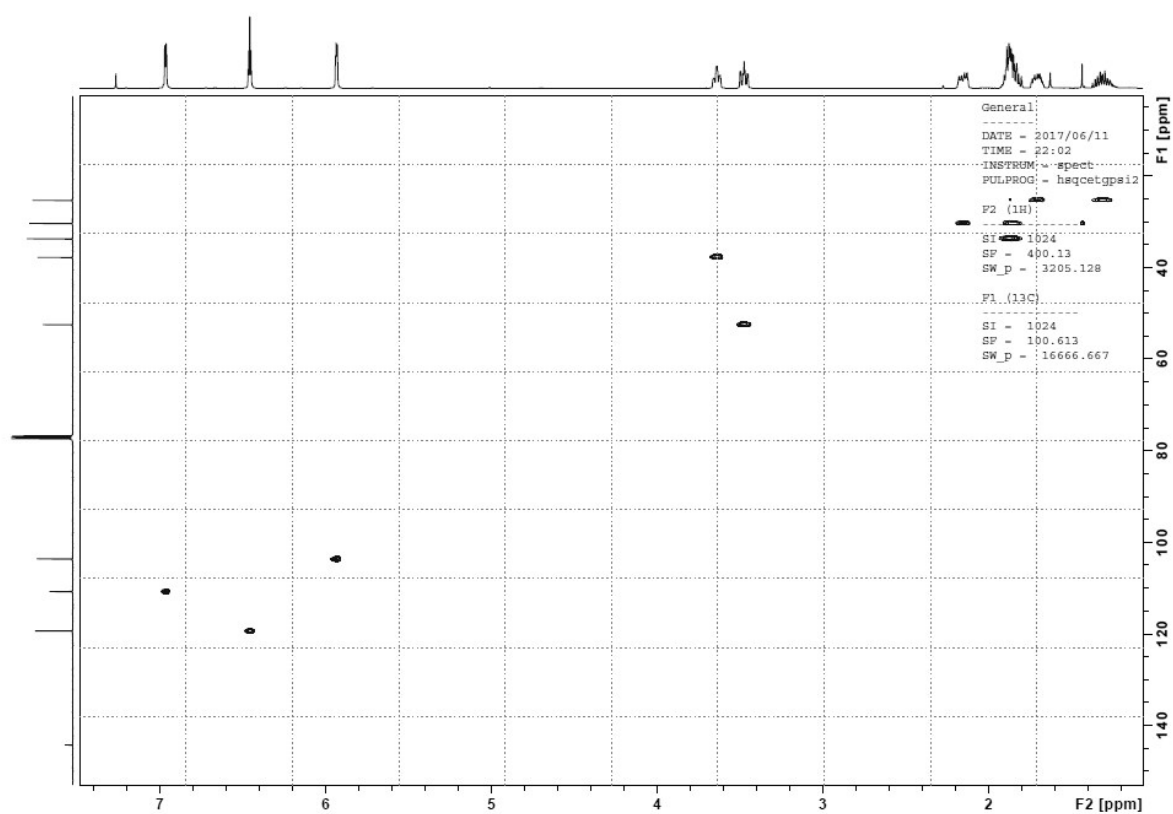

TG-182 12 1 /opt/topepin3.2/data/nmr/nu/nmr

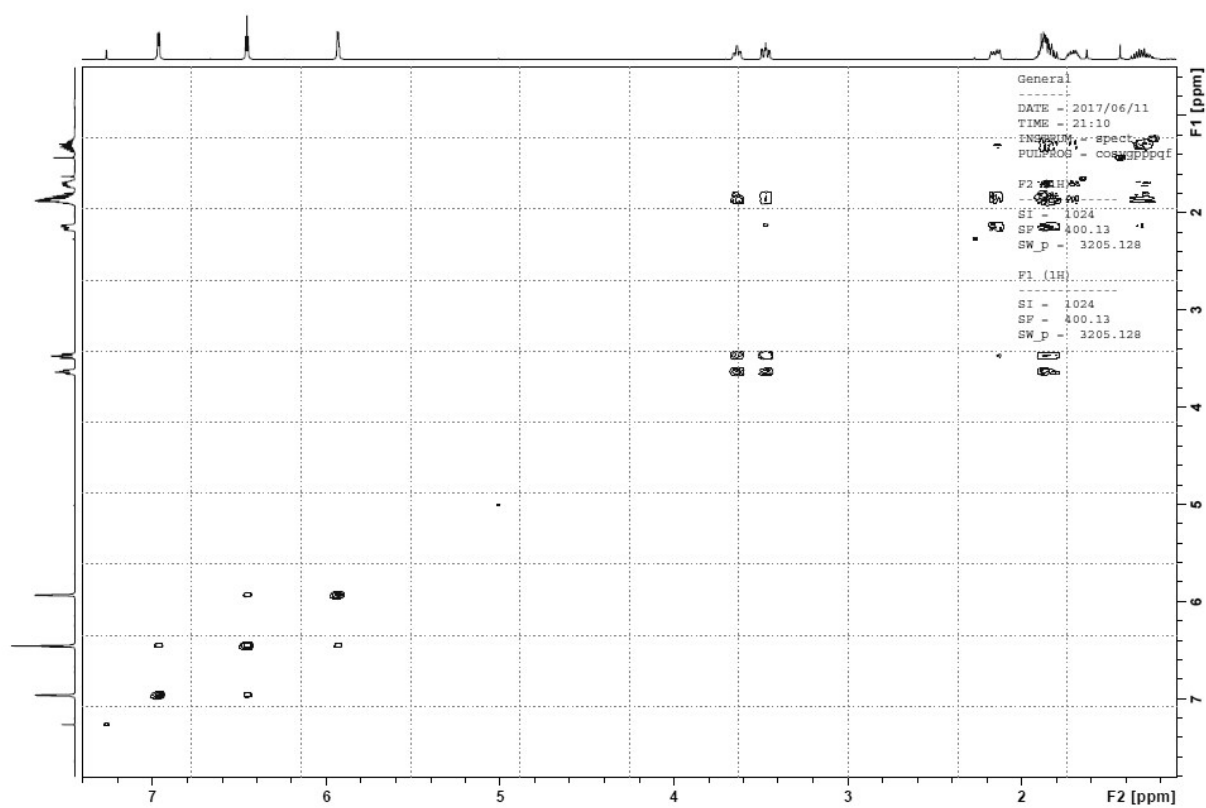

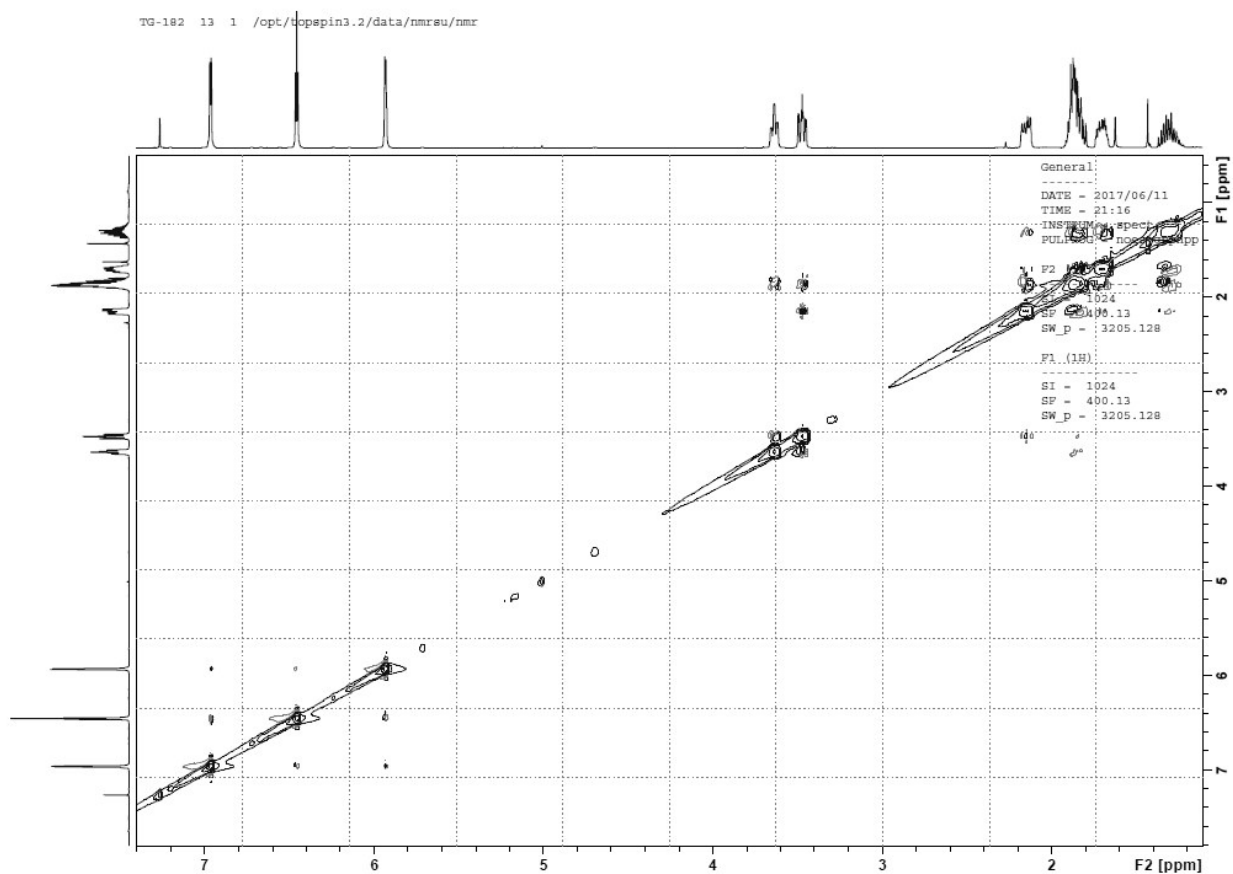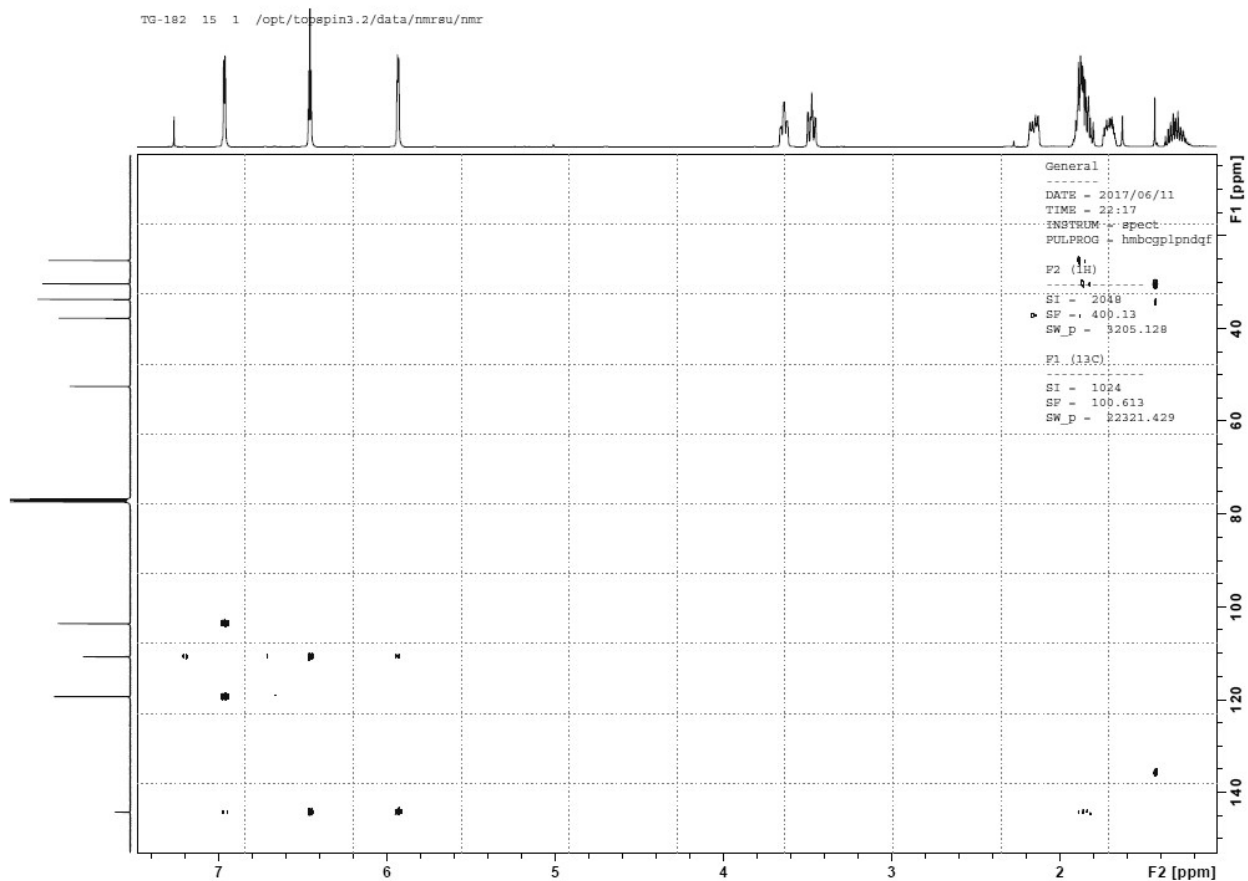

Compound **14p**

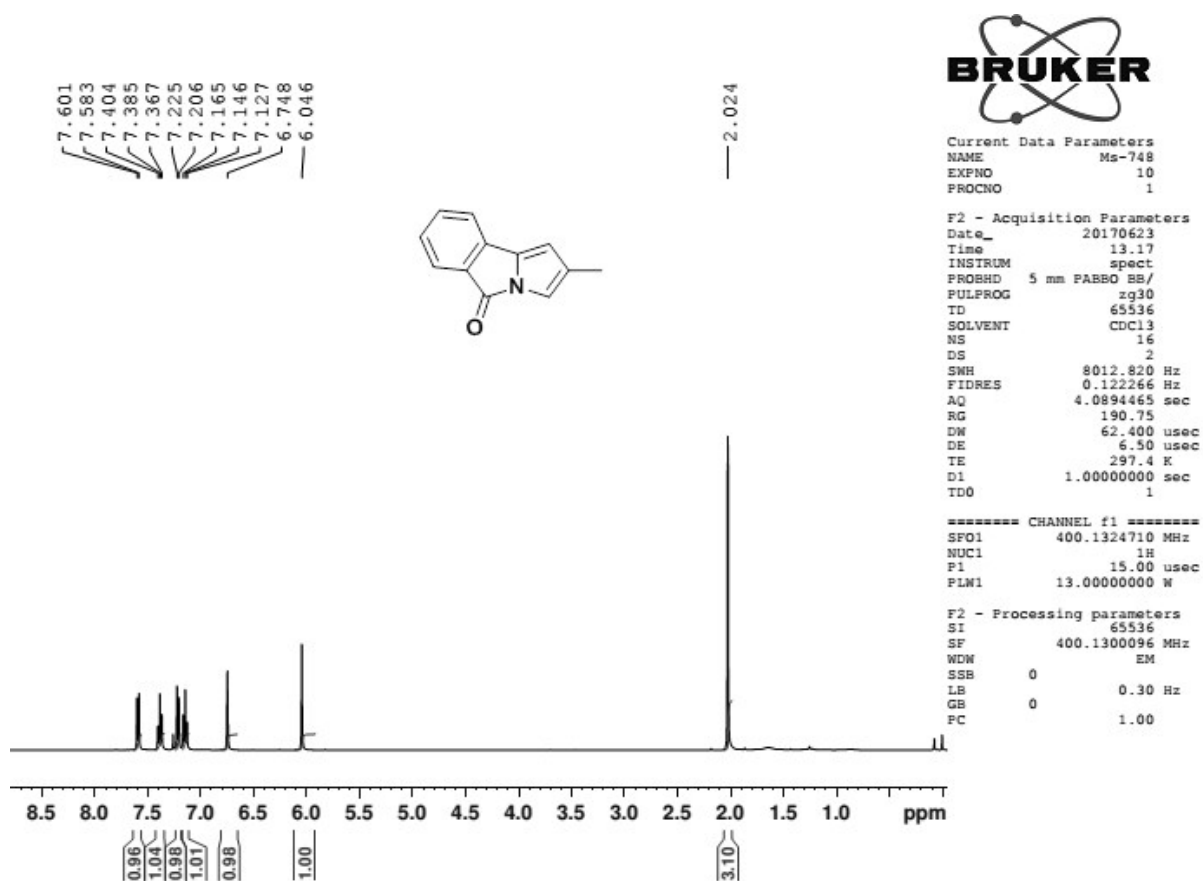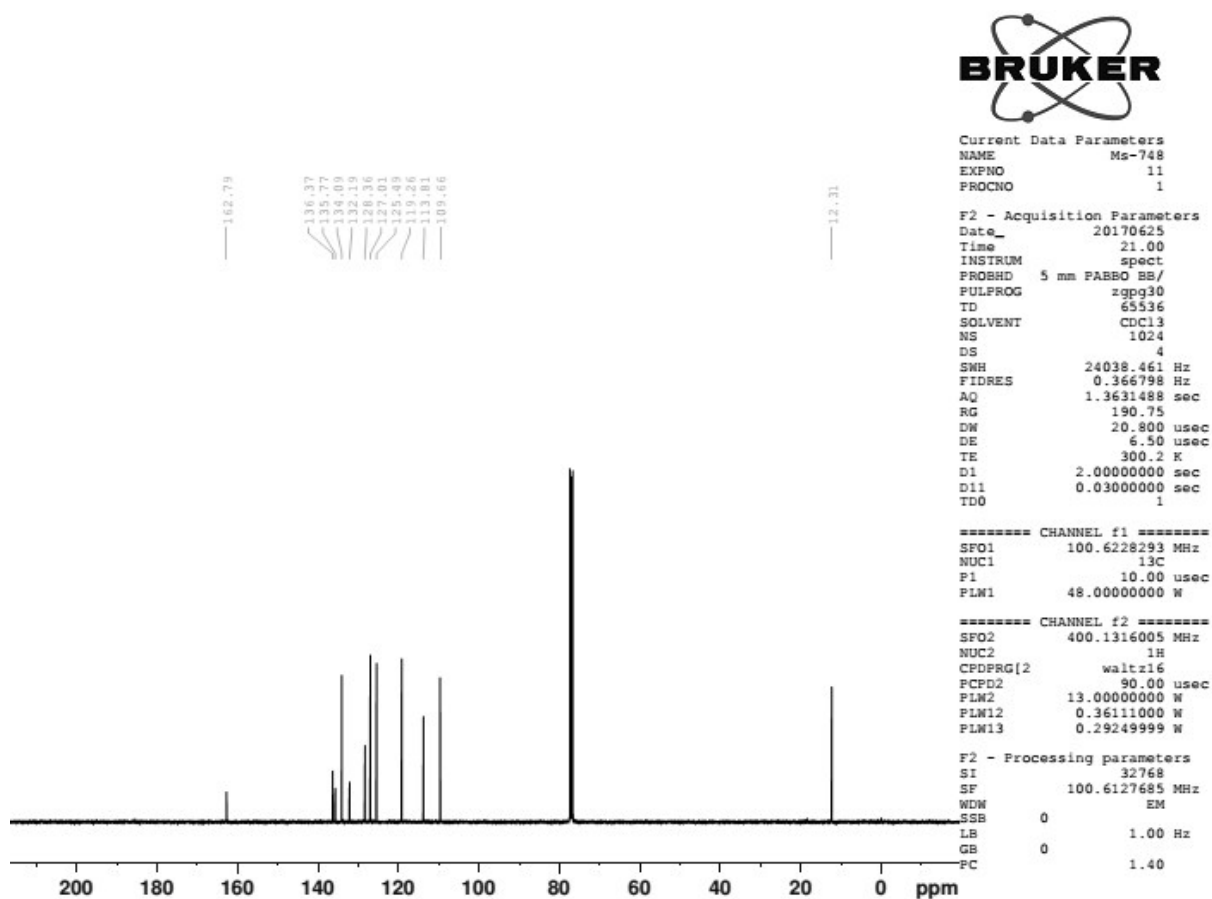

# Compound 14q

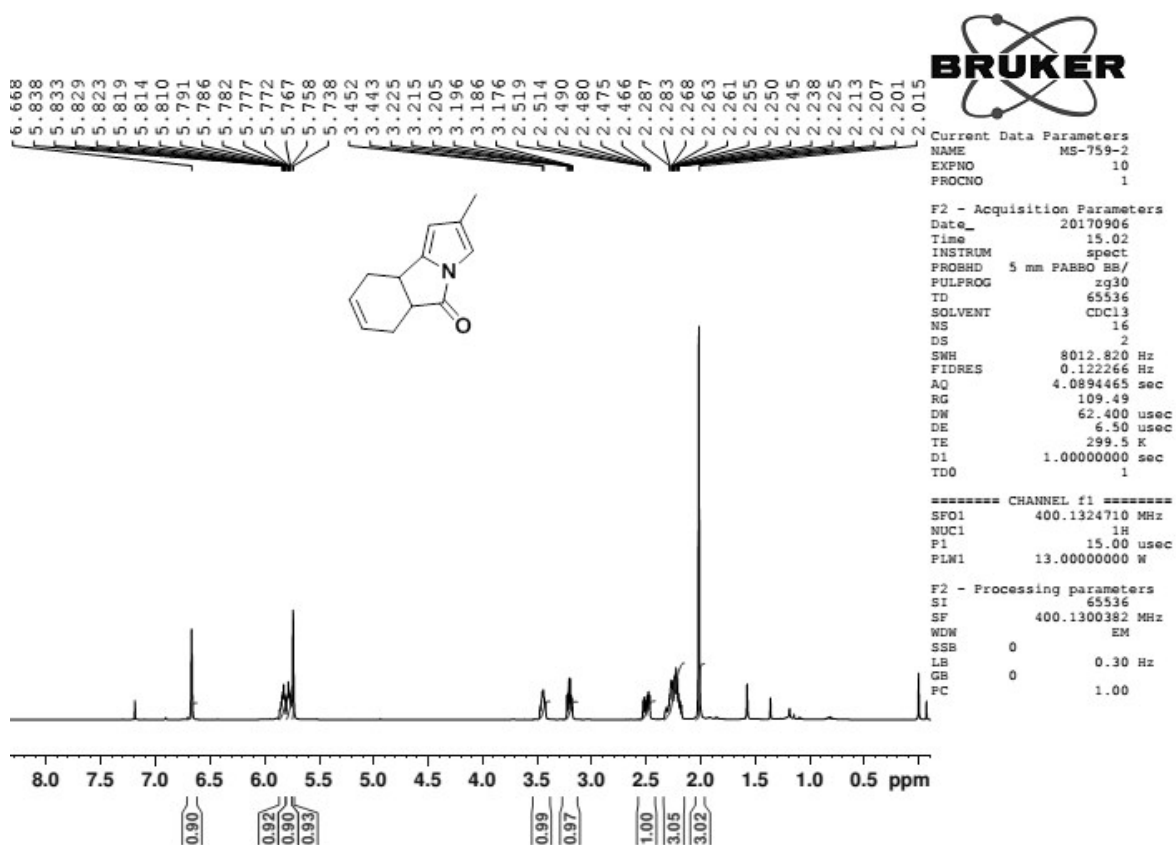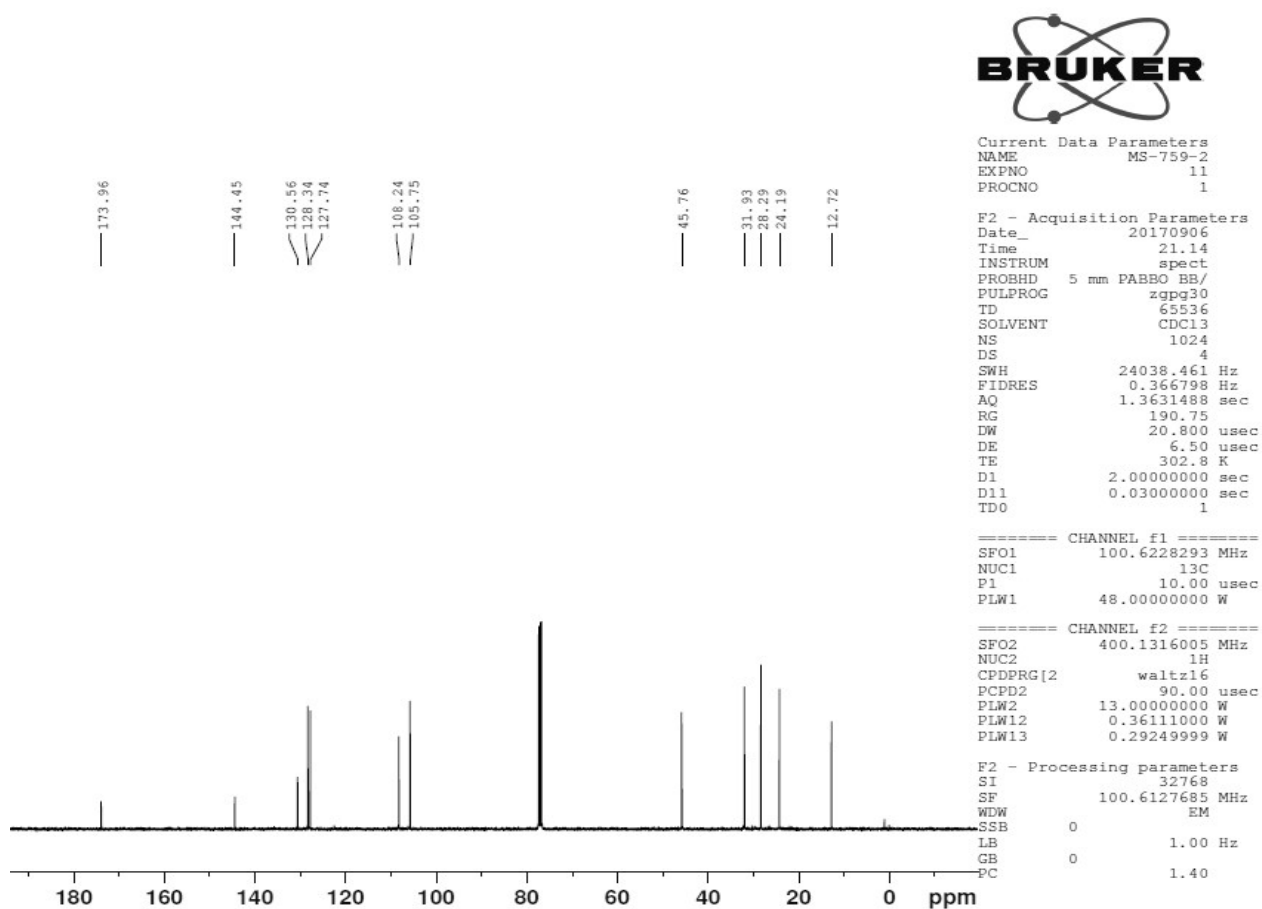

# Compound 14r

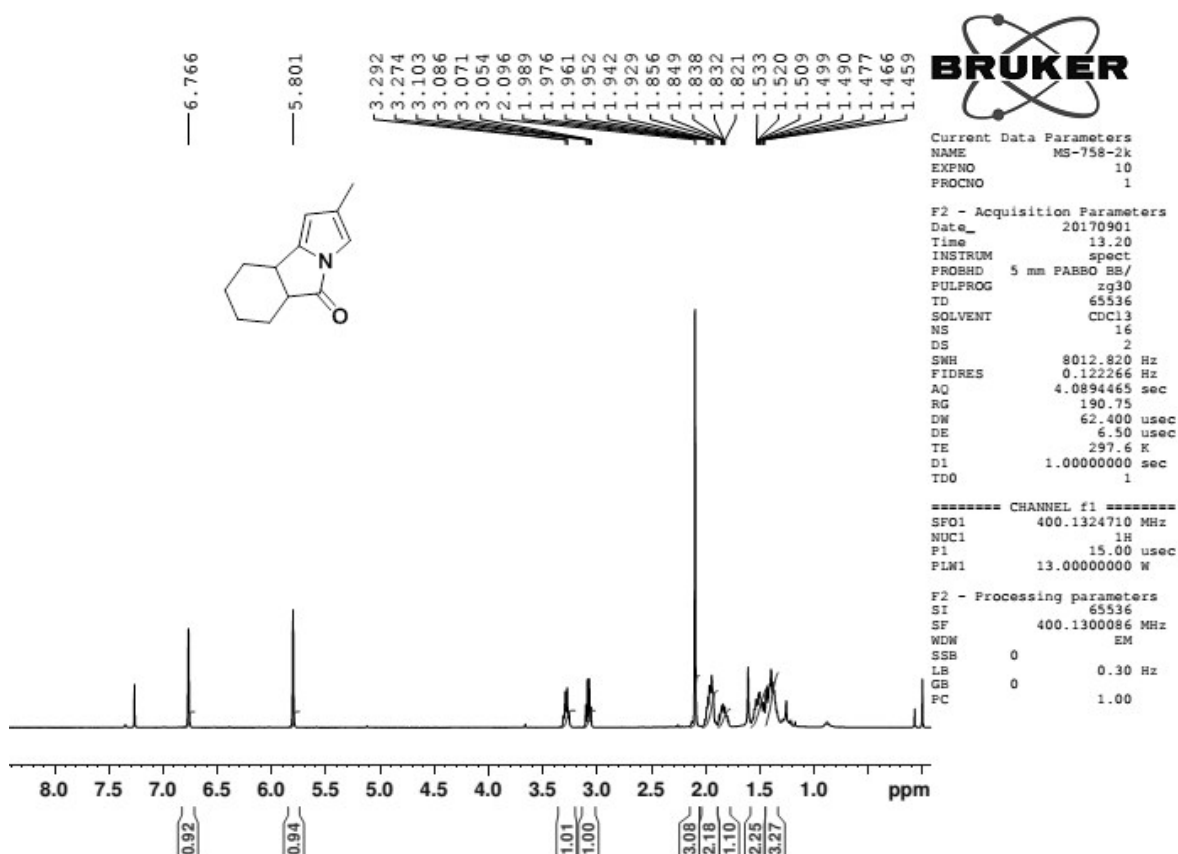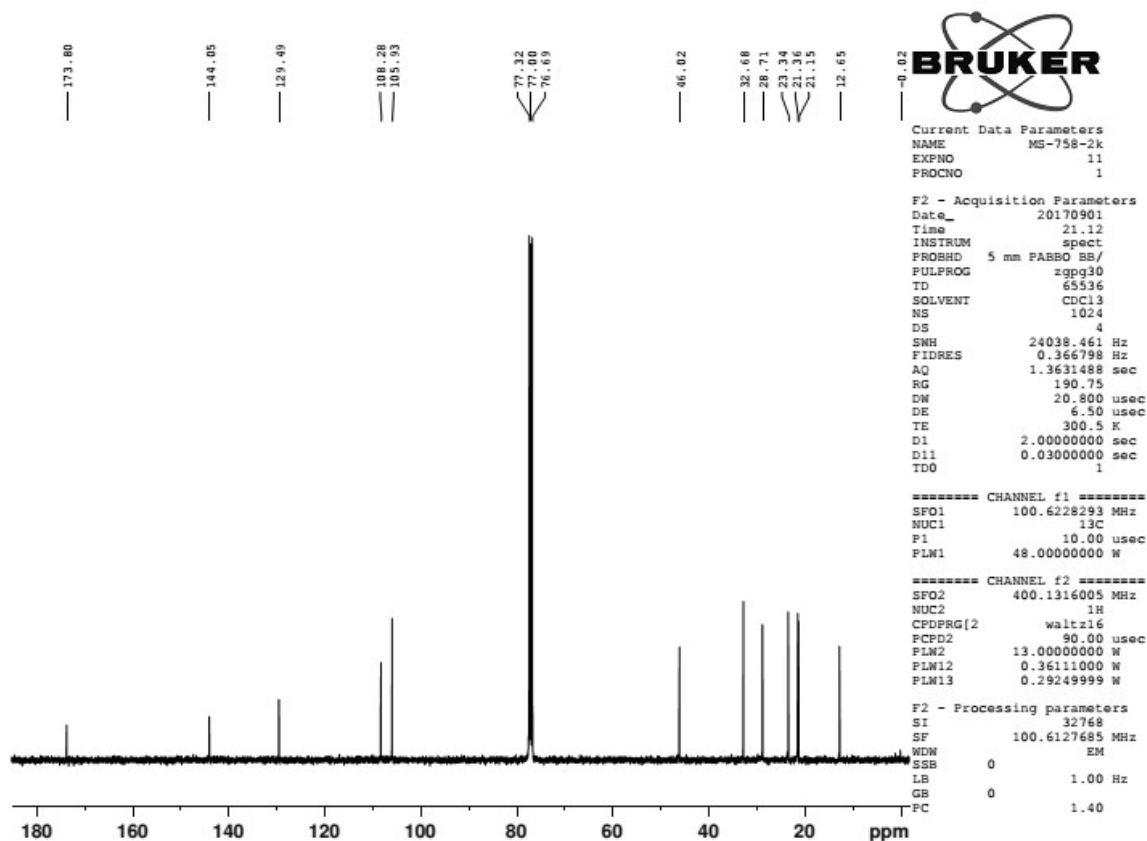

Compound **15a**

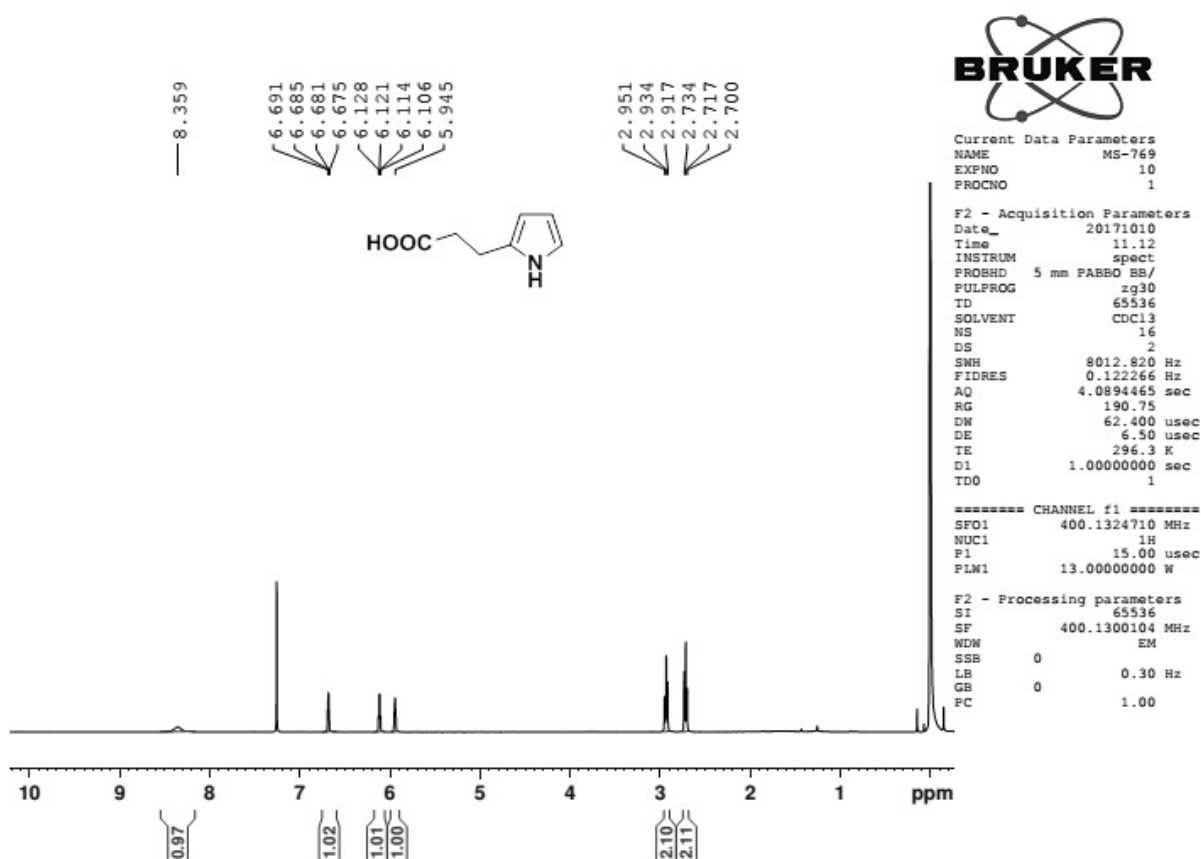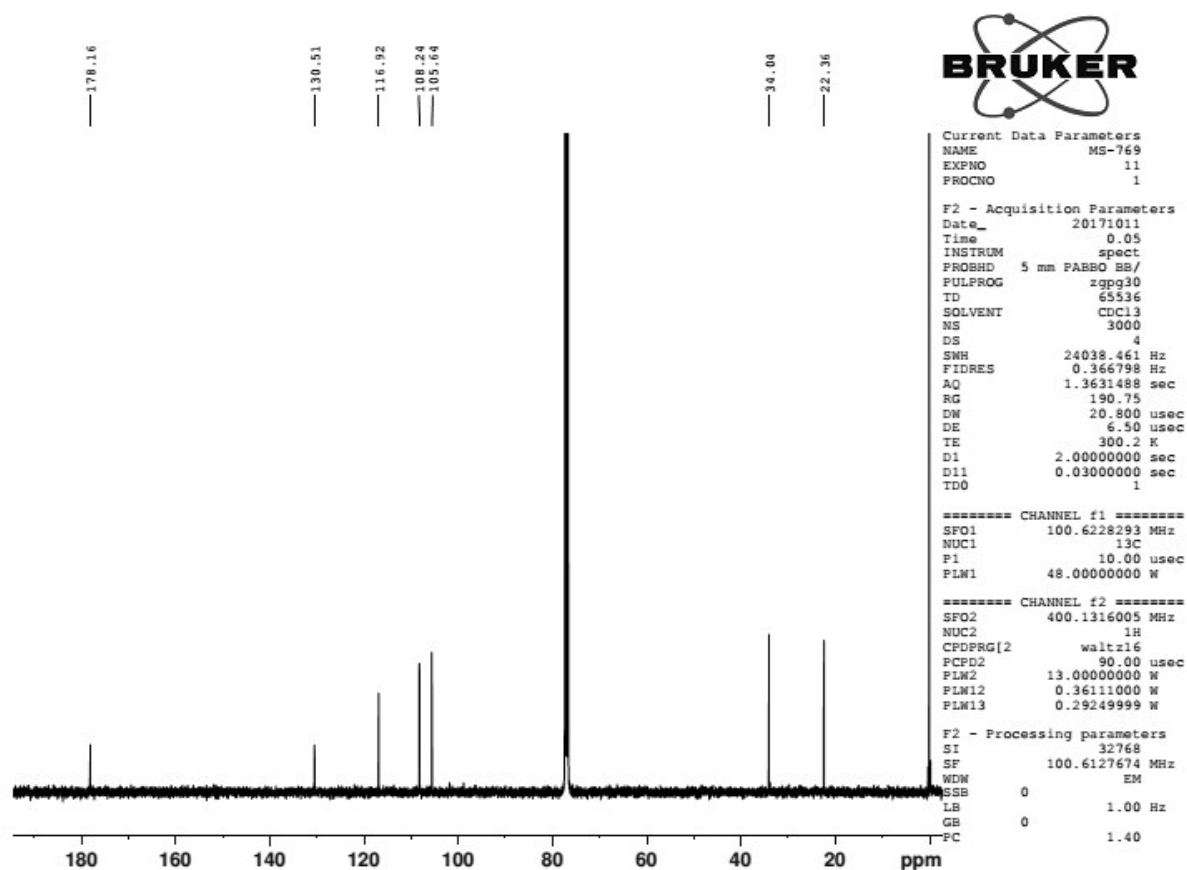

# Compound 15b

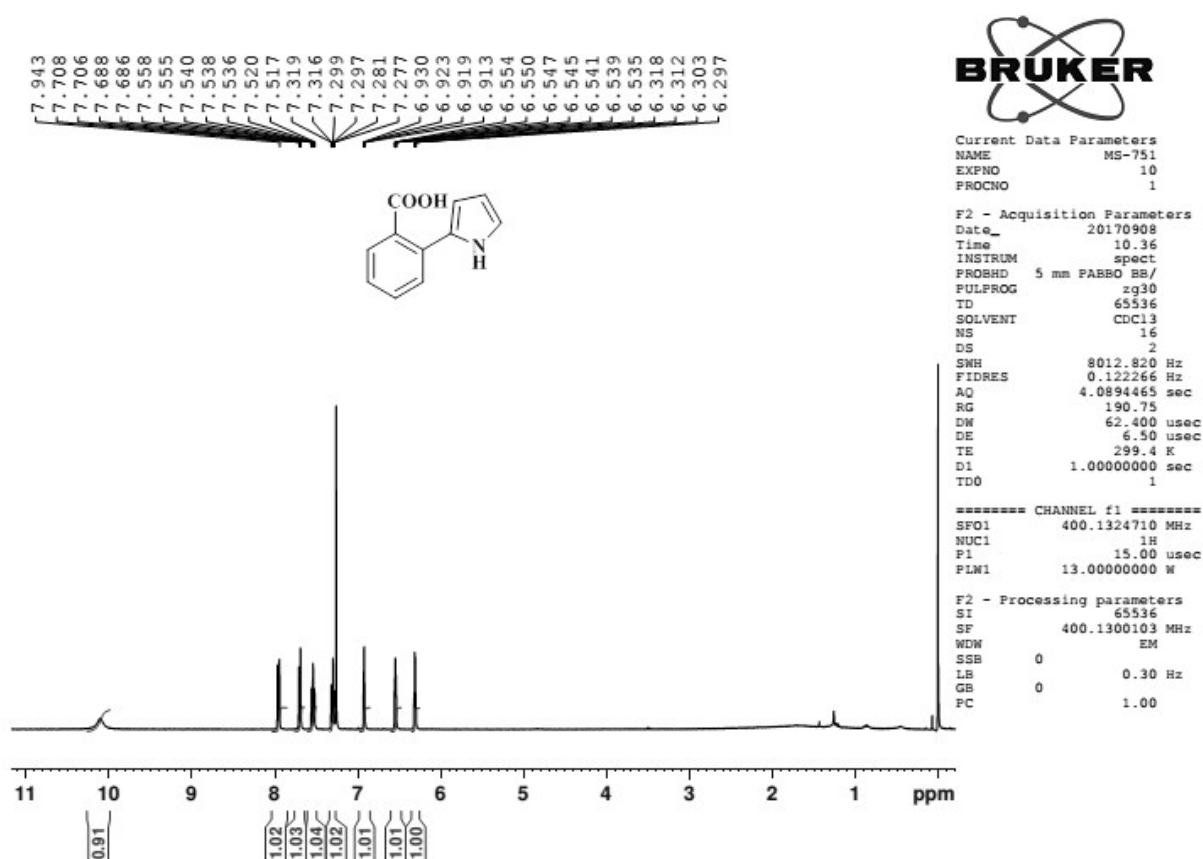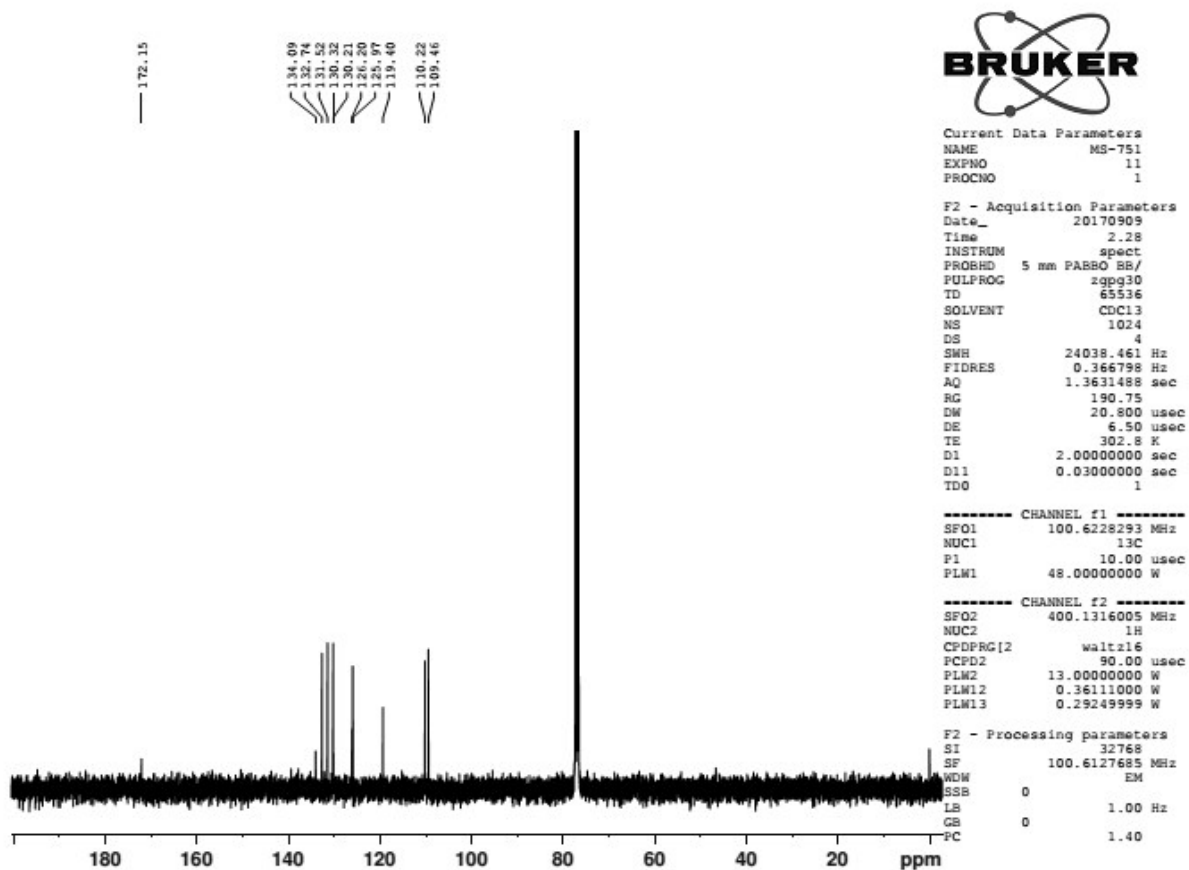

# Compound 15c

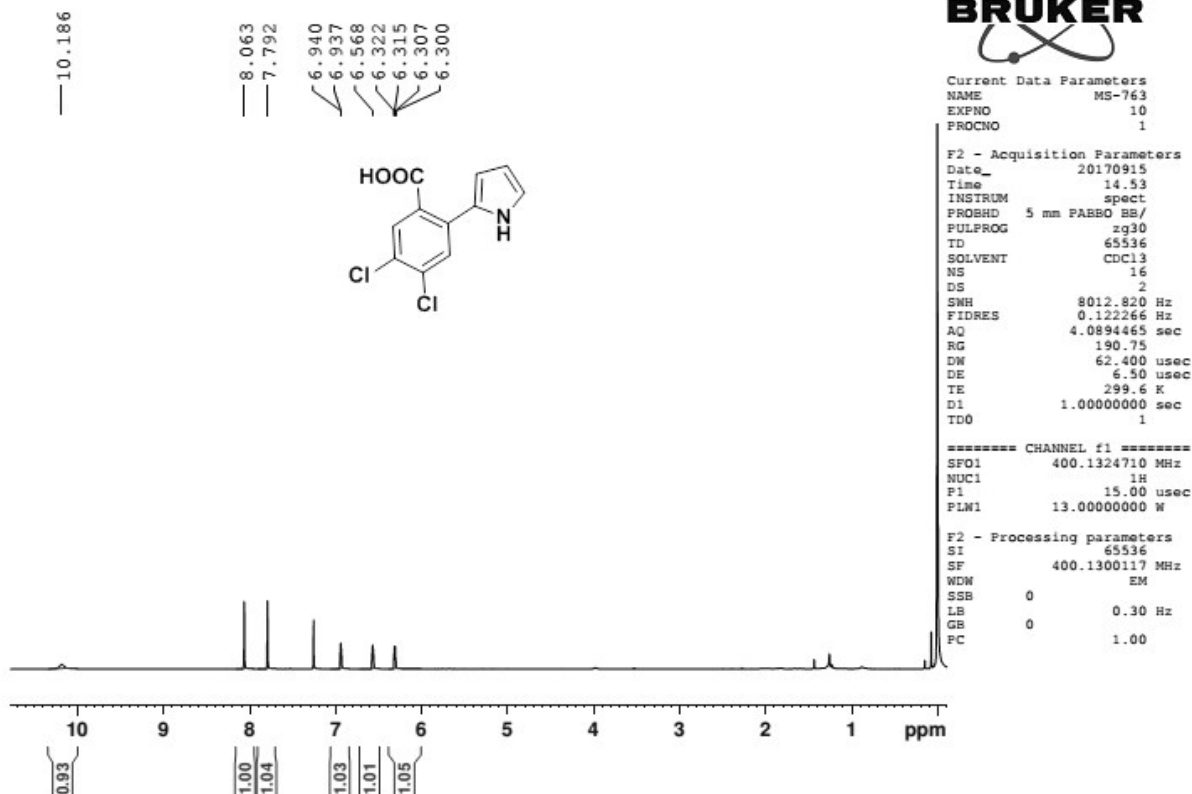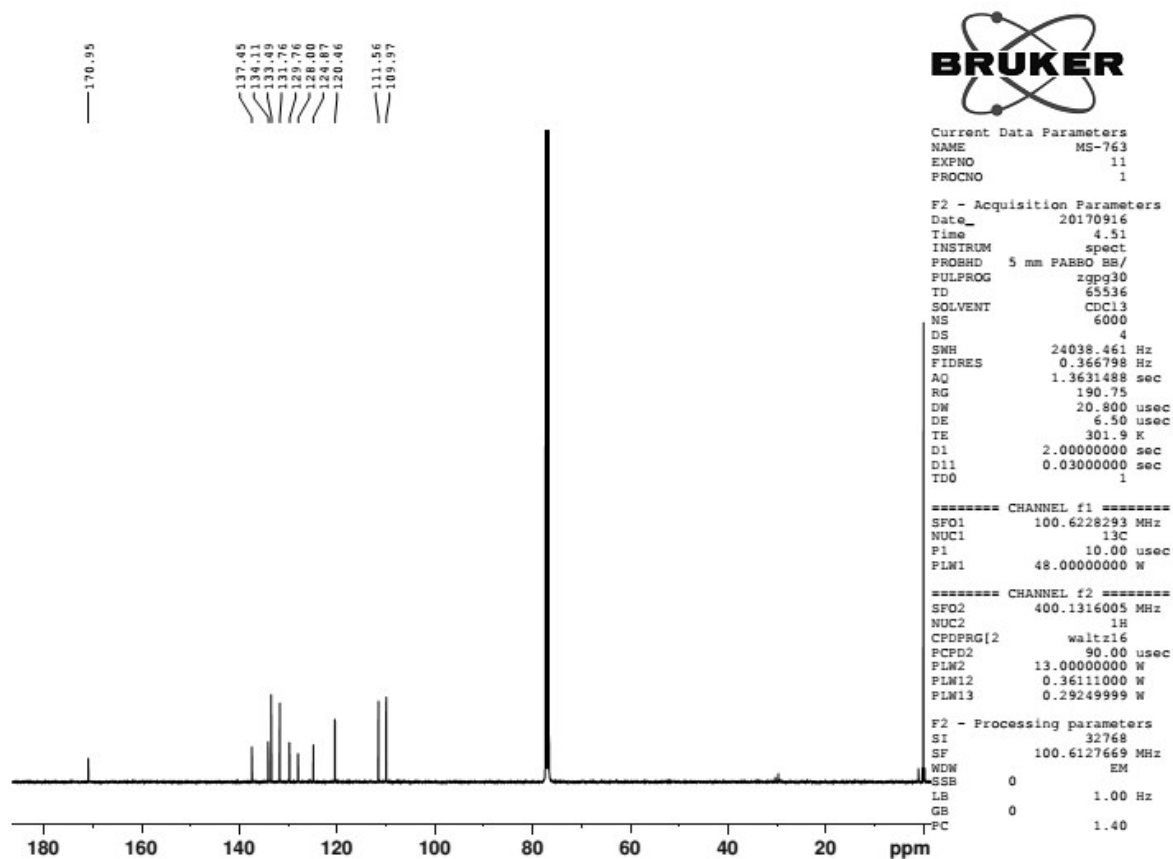



# Compound 16

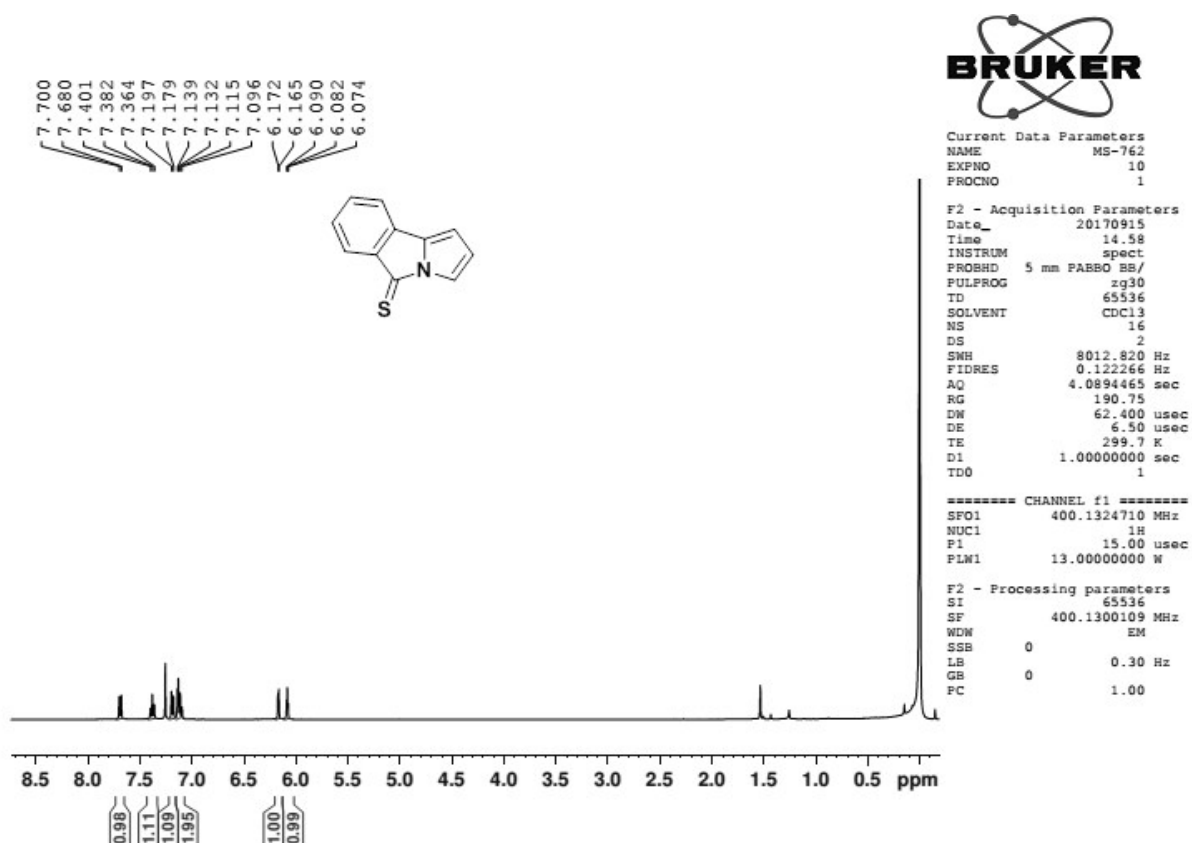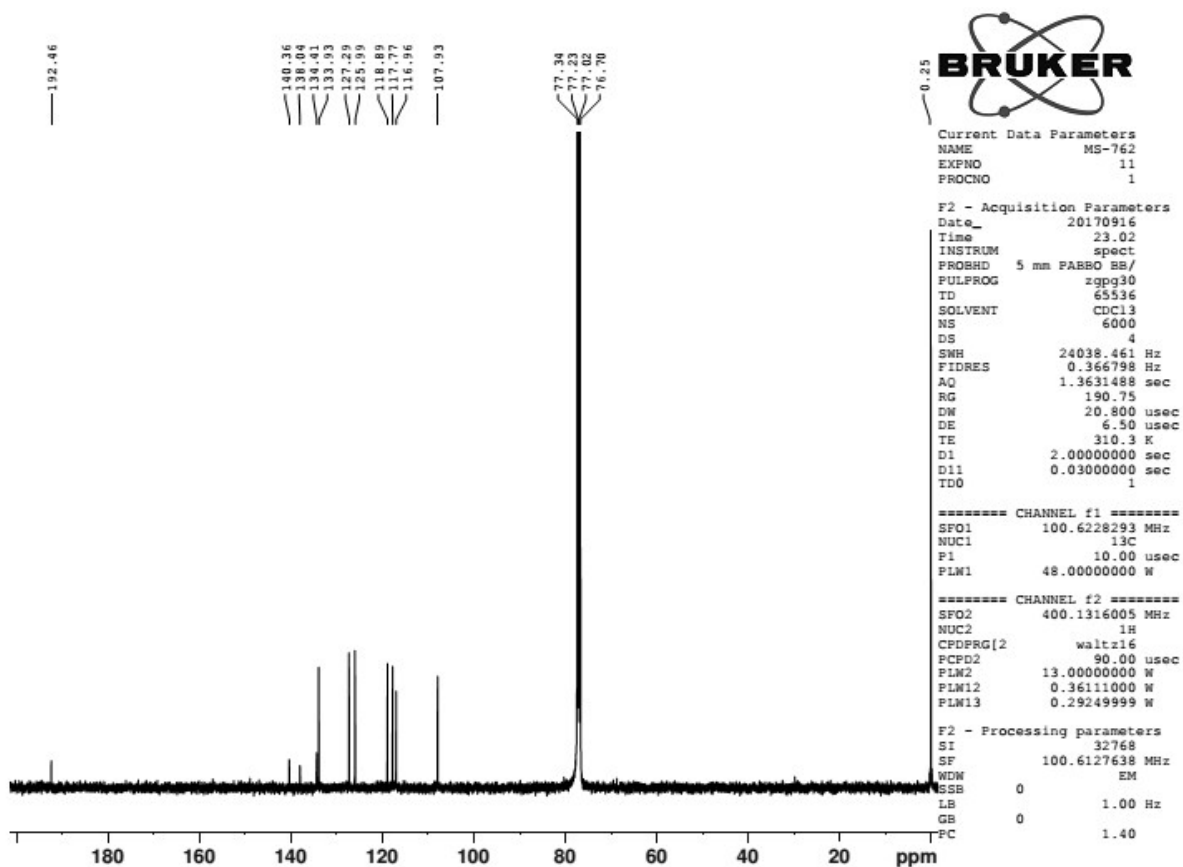

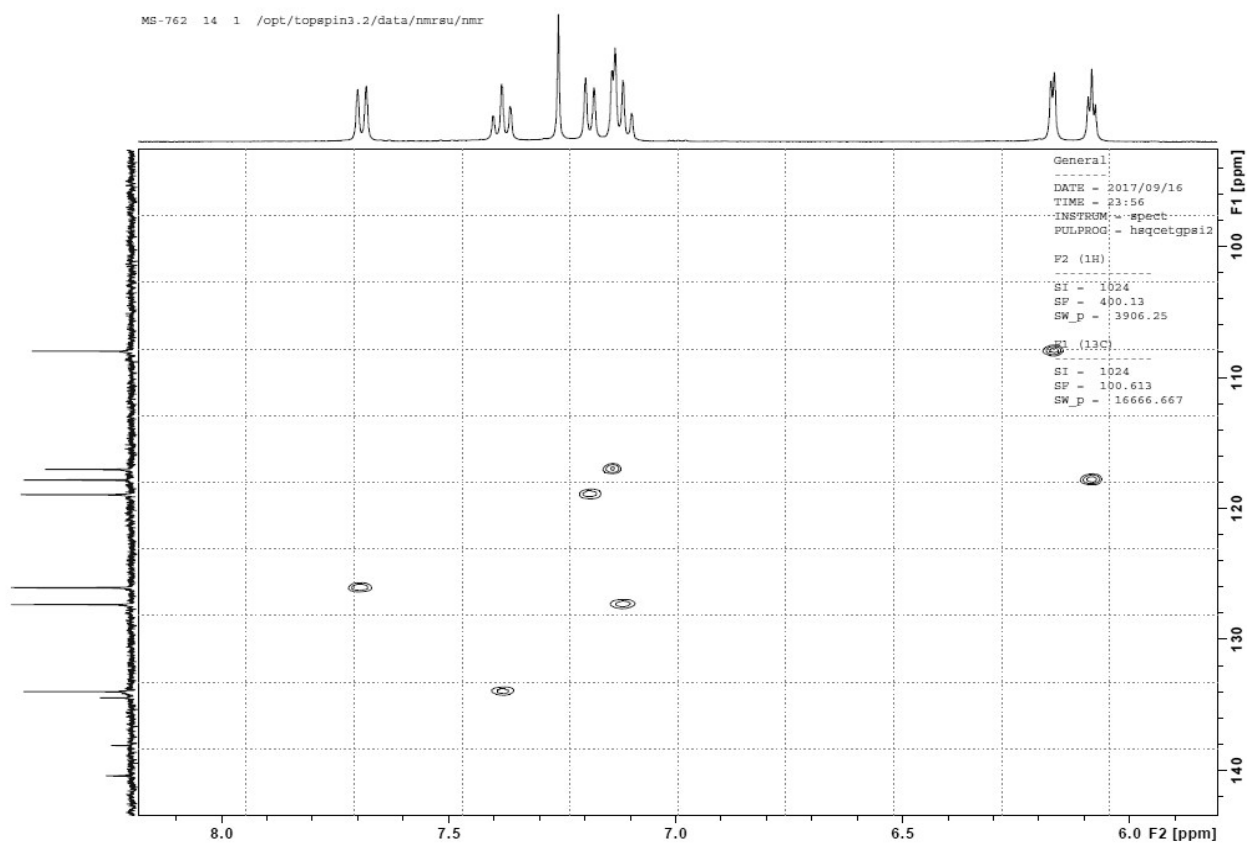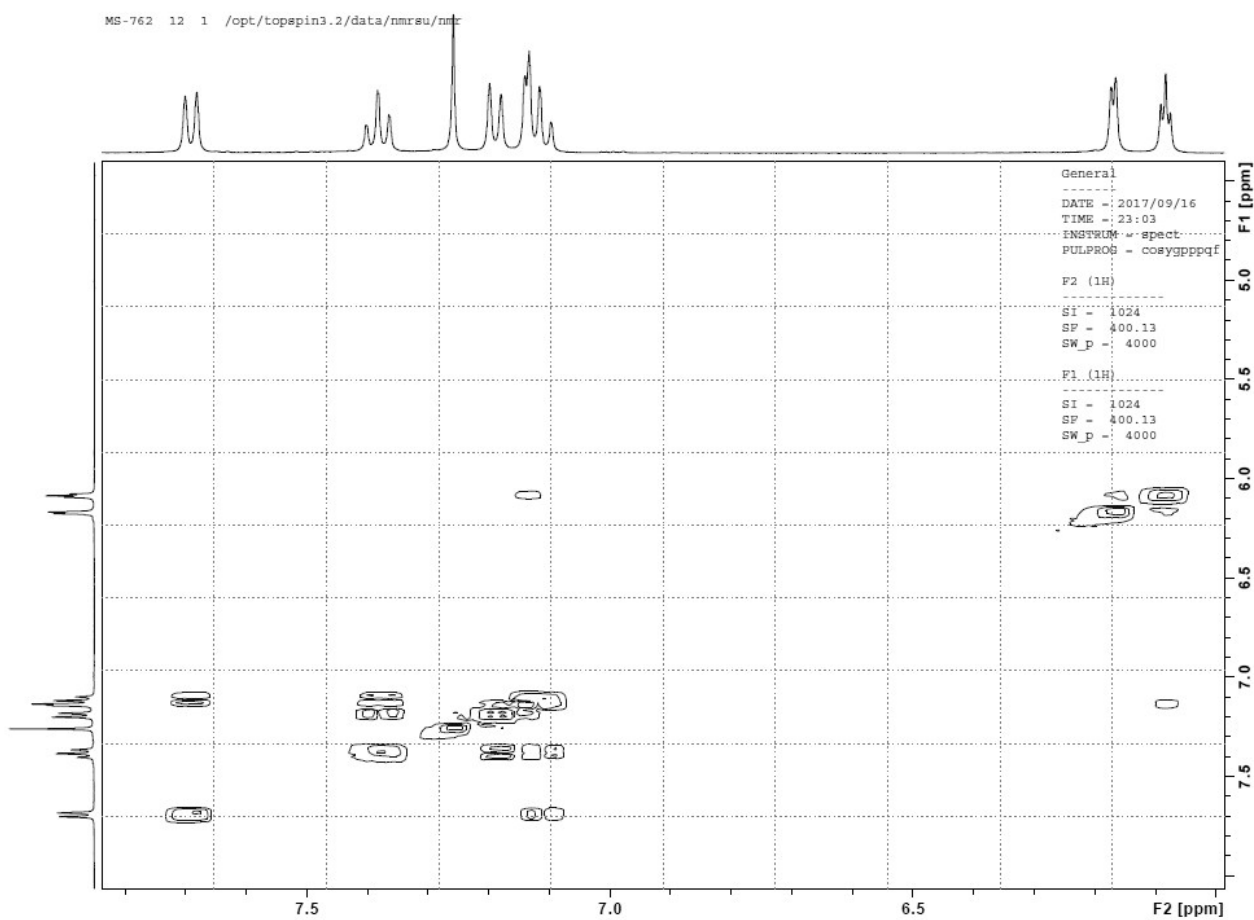

# Compound 17

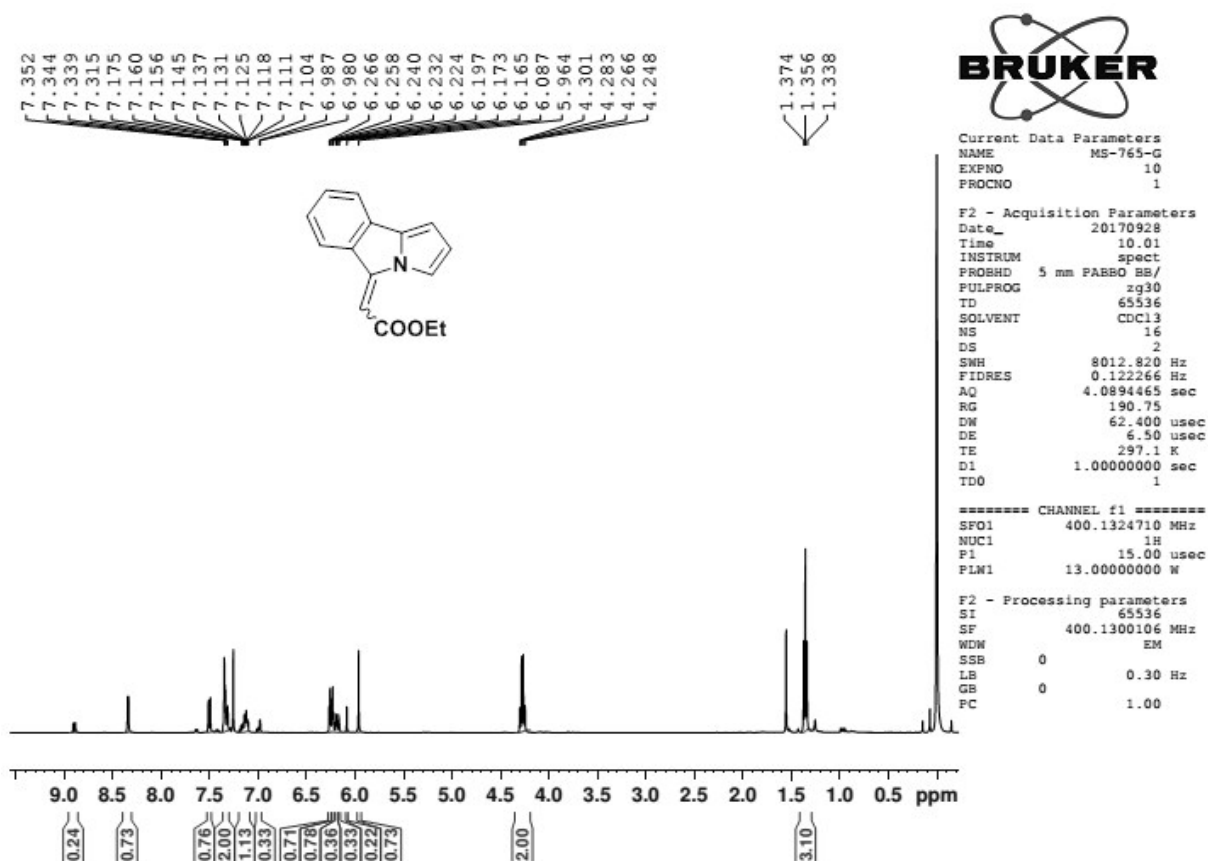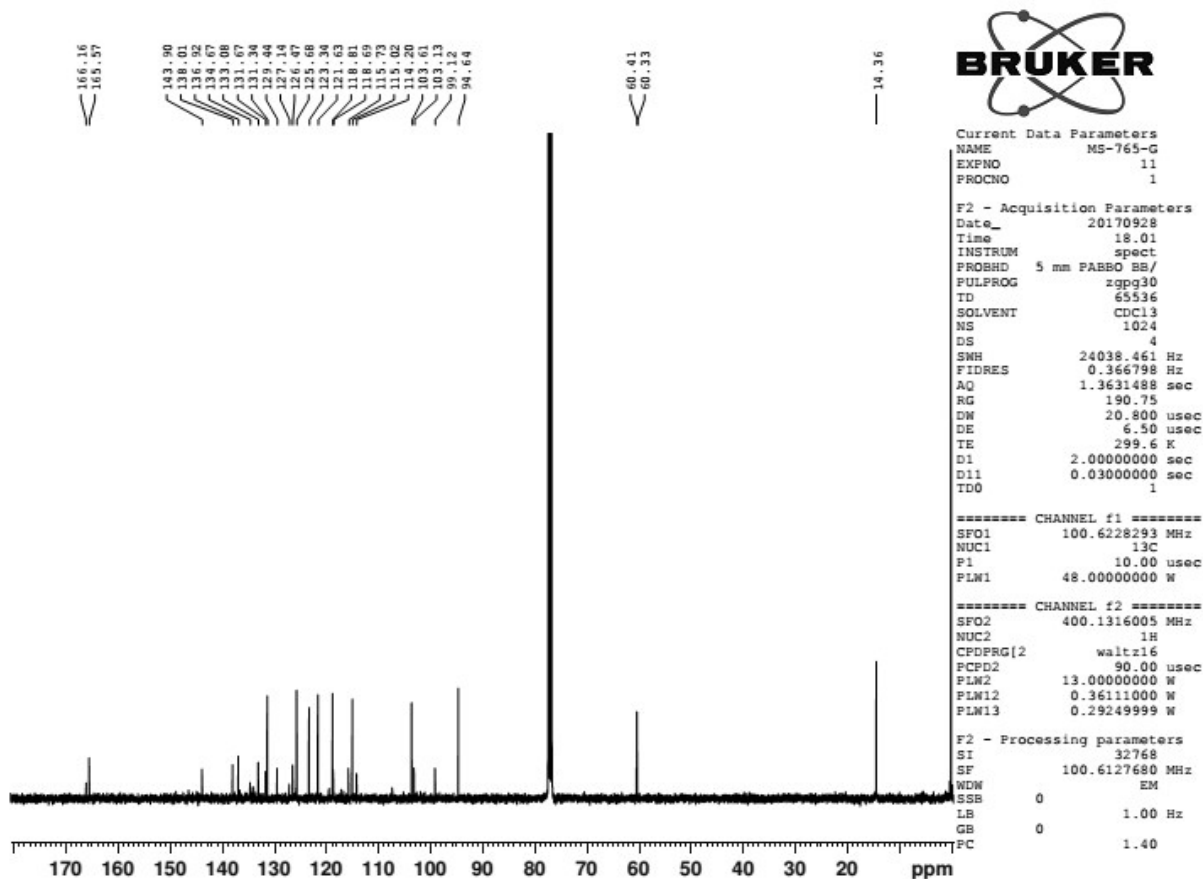

# Compound 18

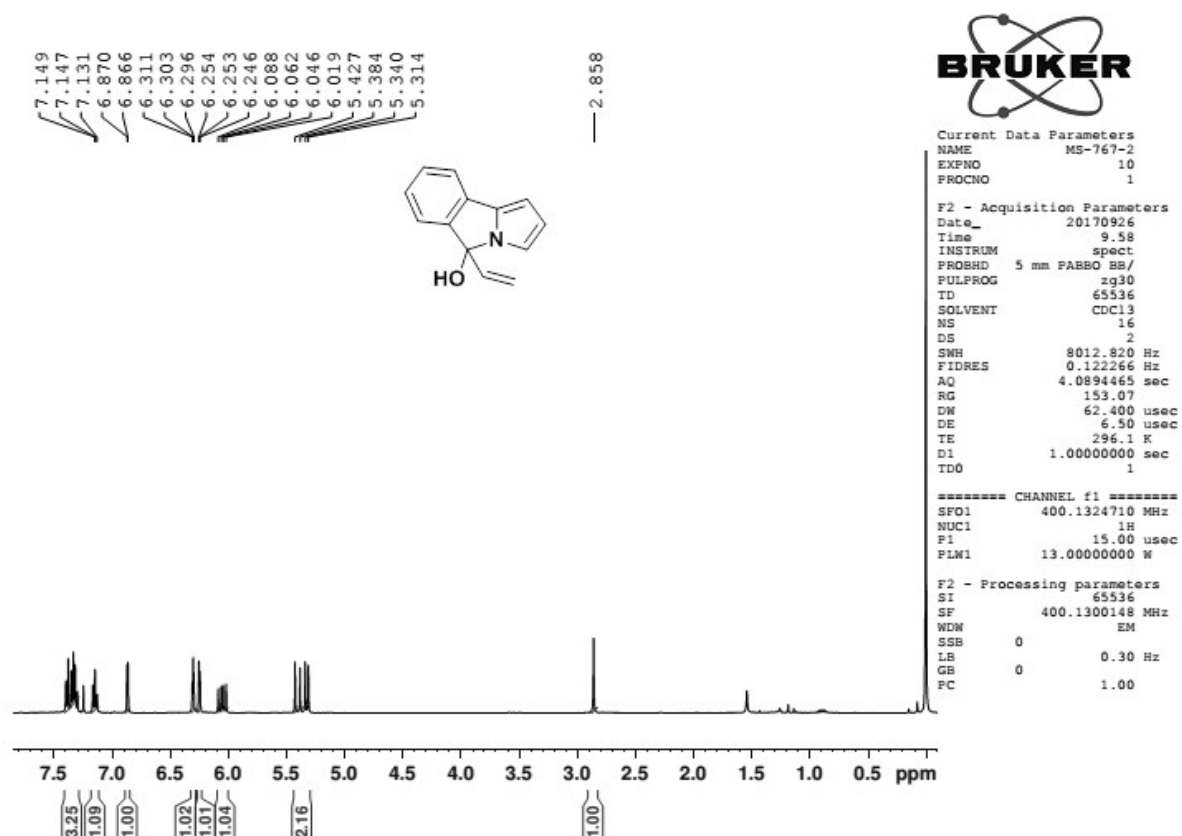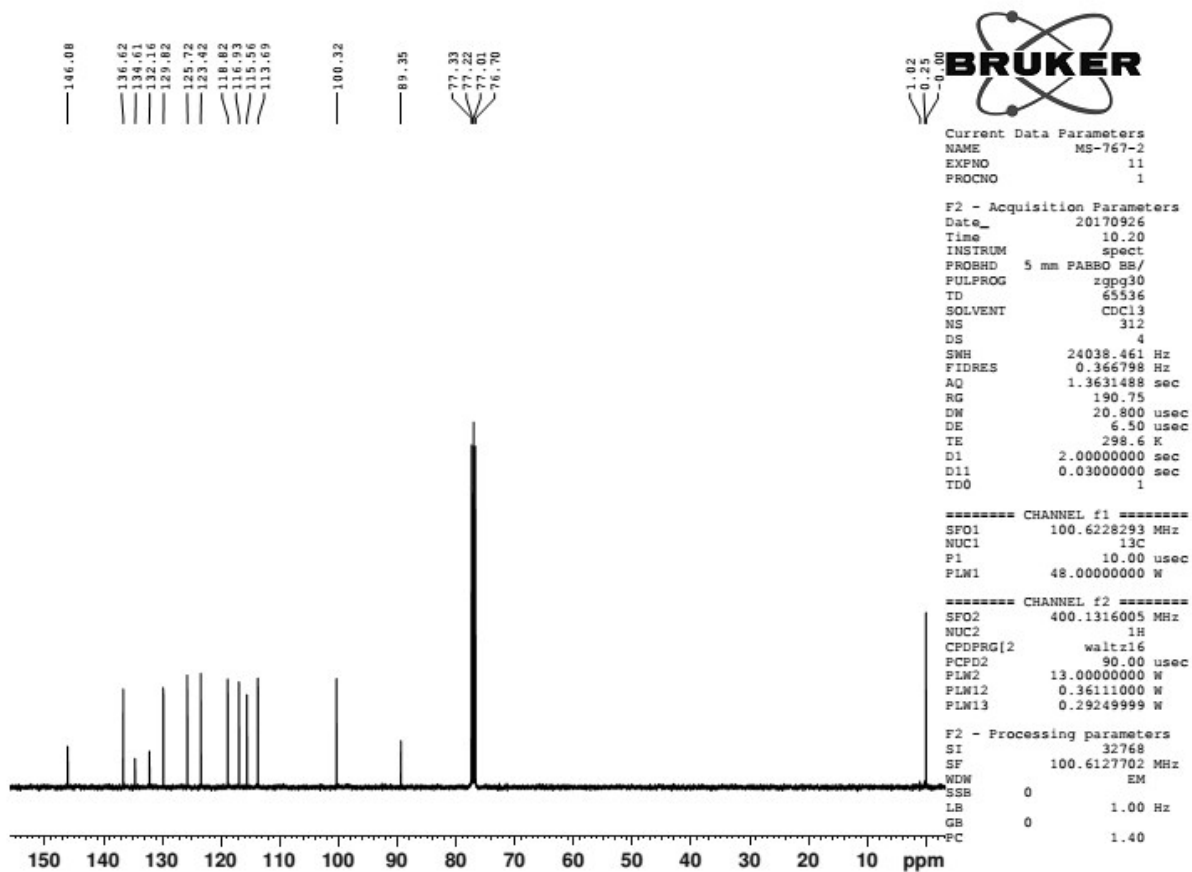

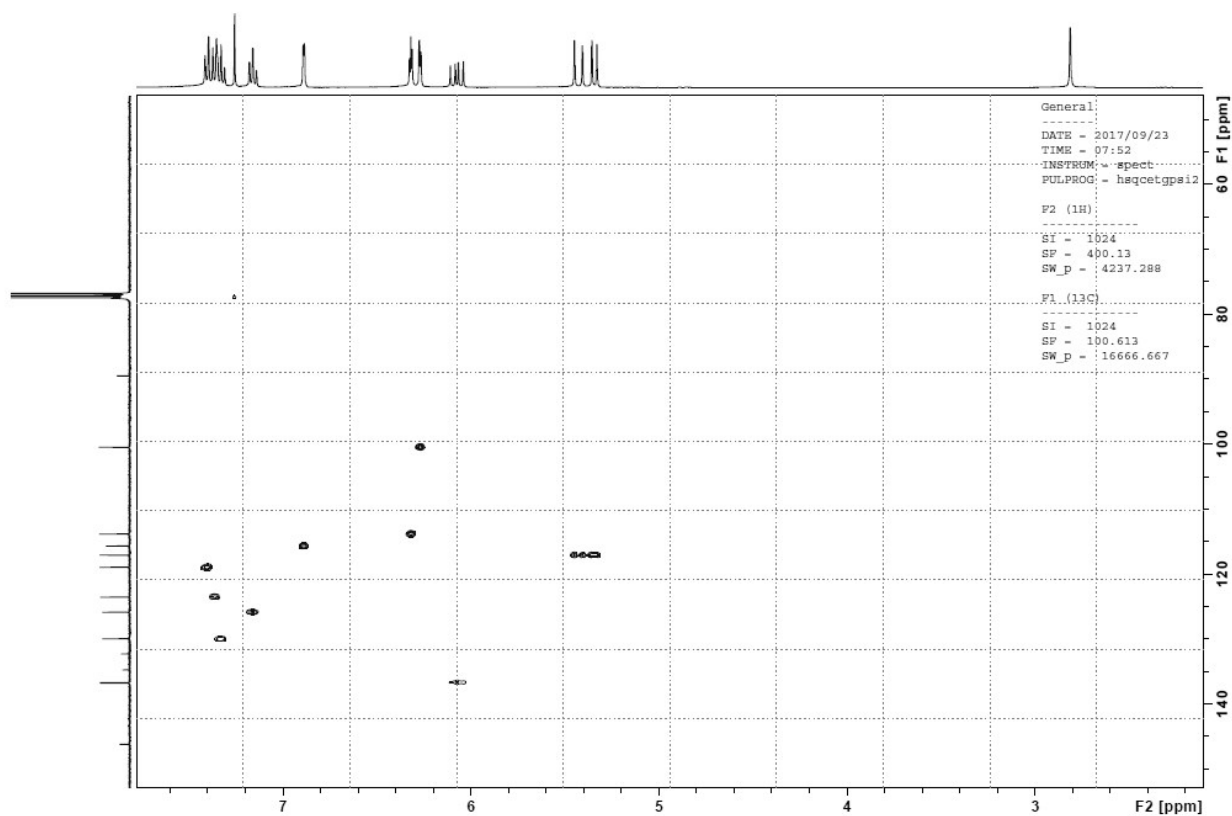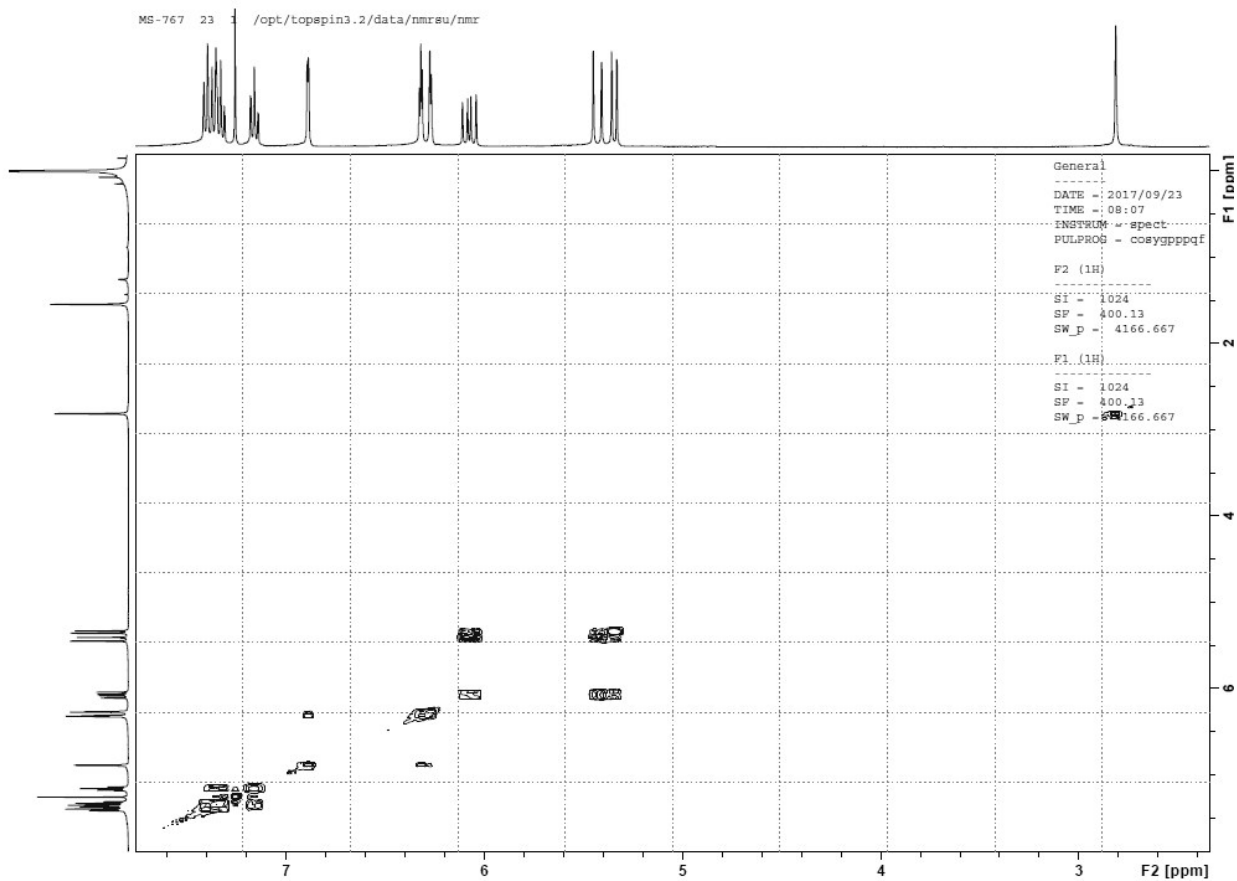

# Compound 19

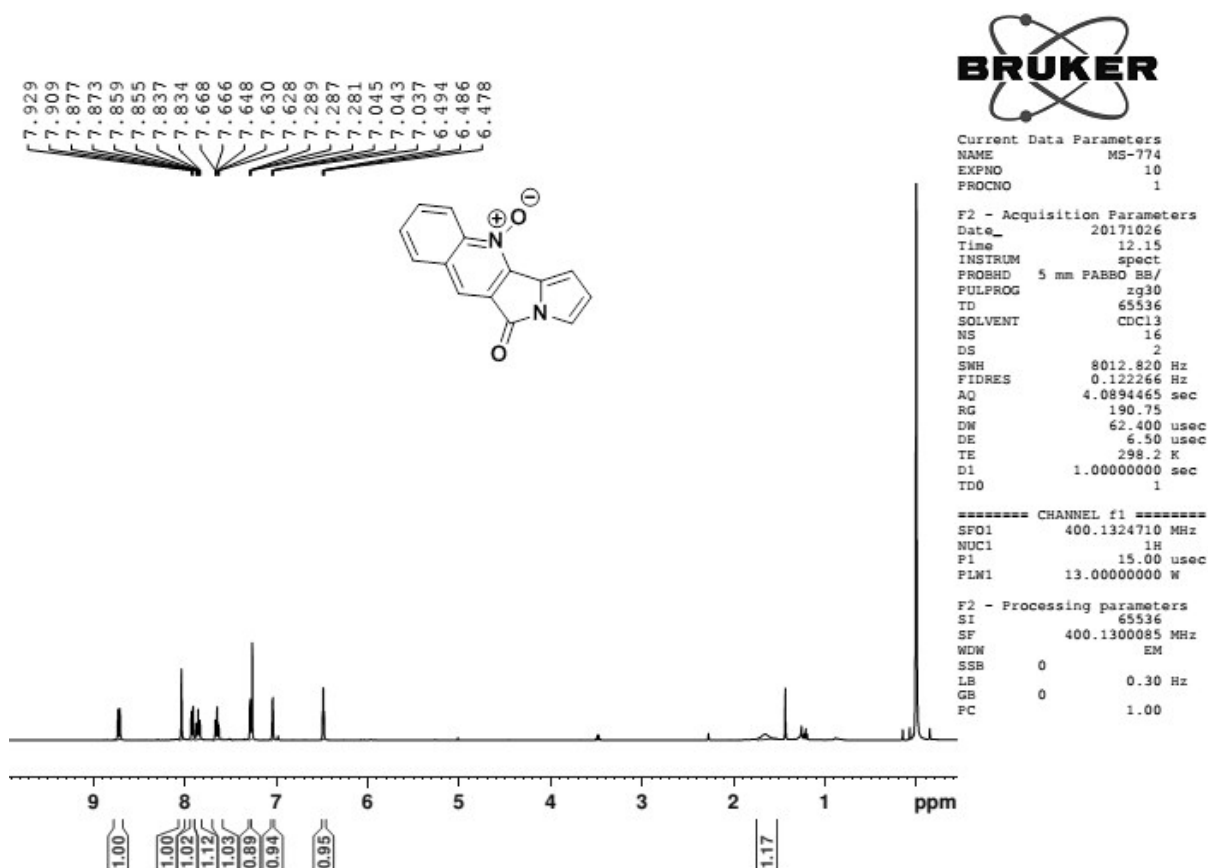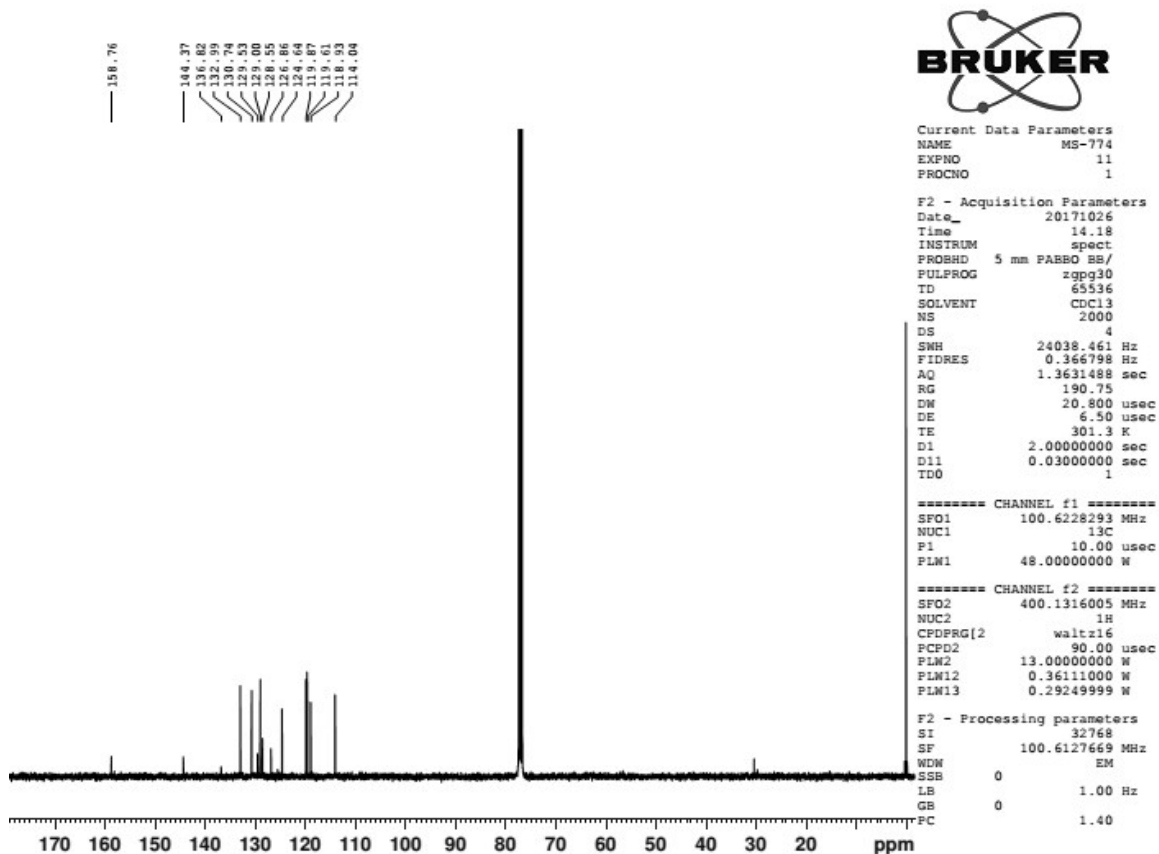

# Compound 25

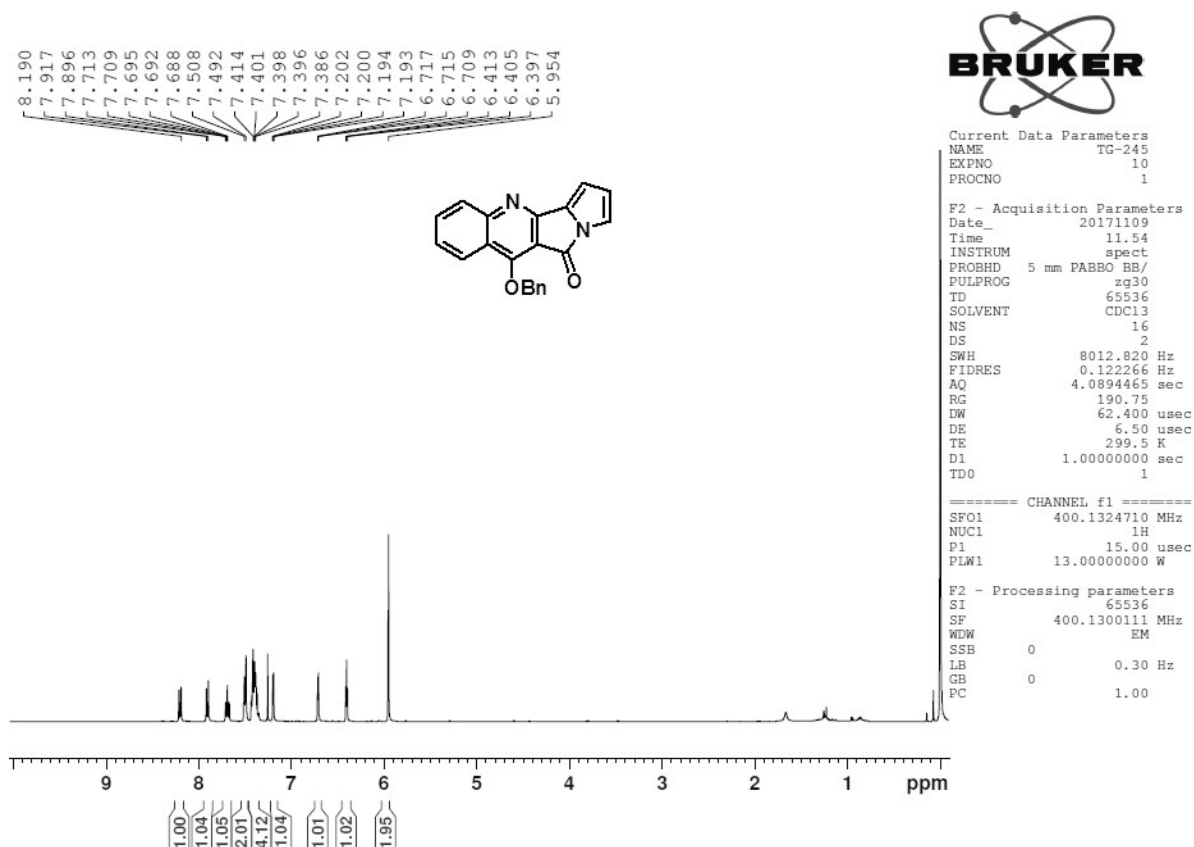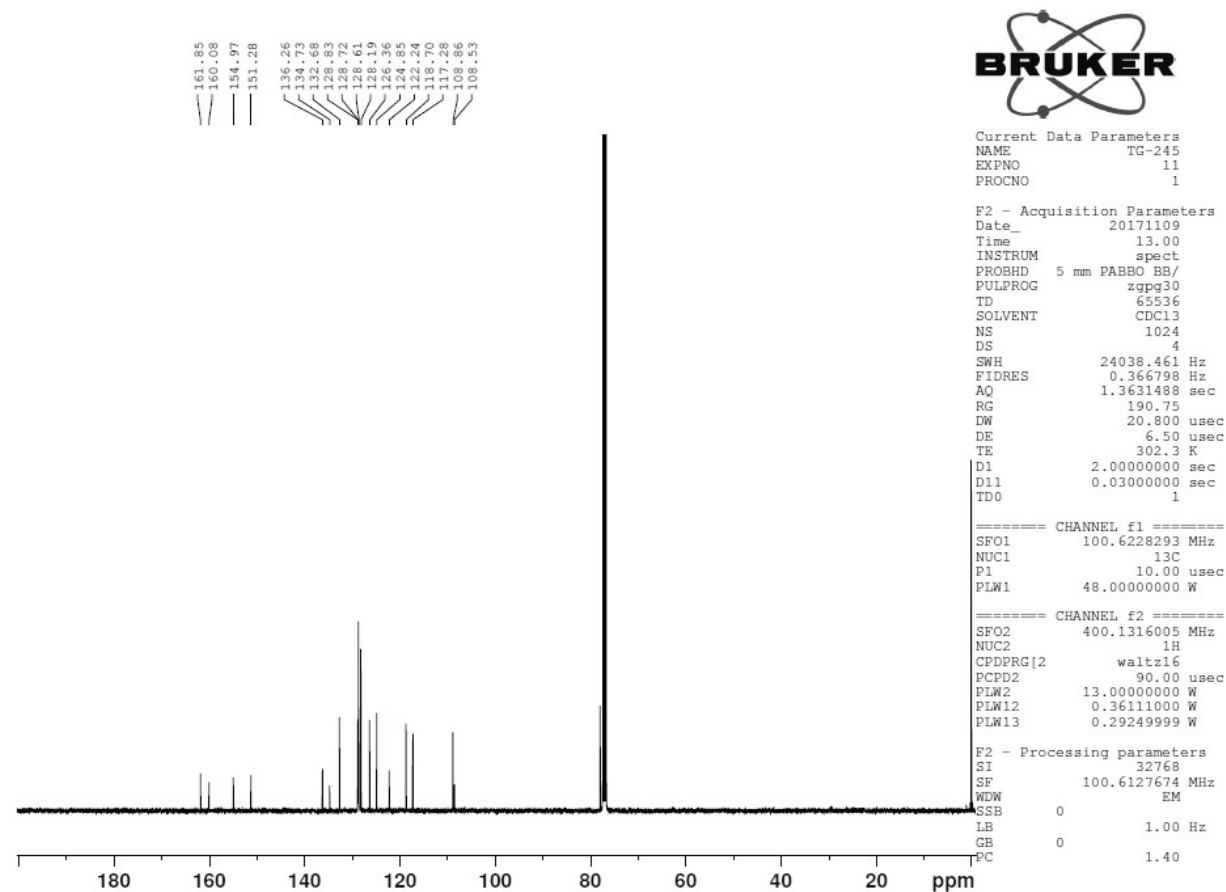

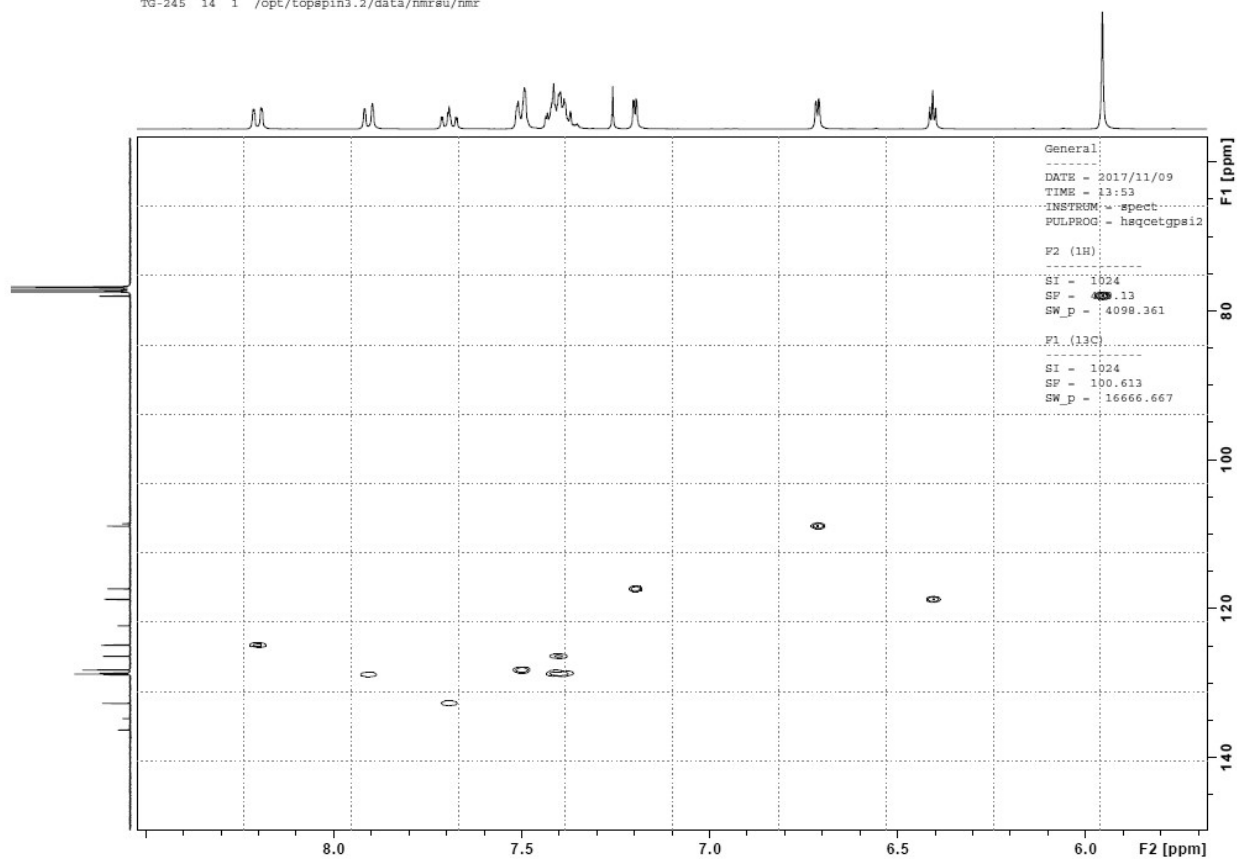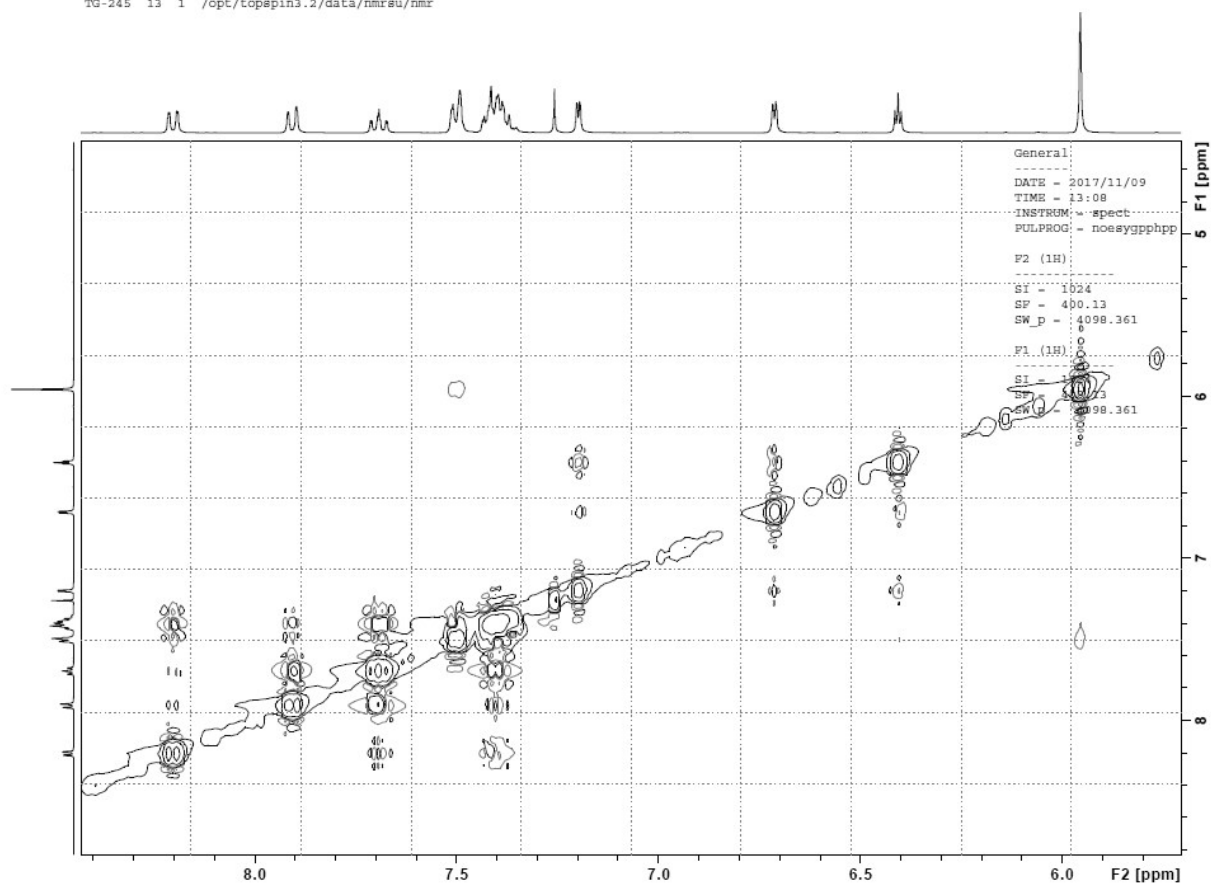



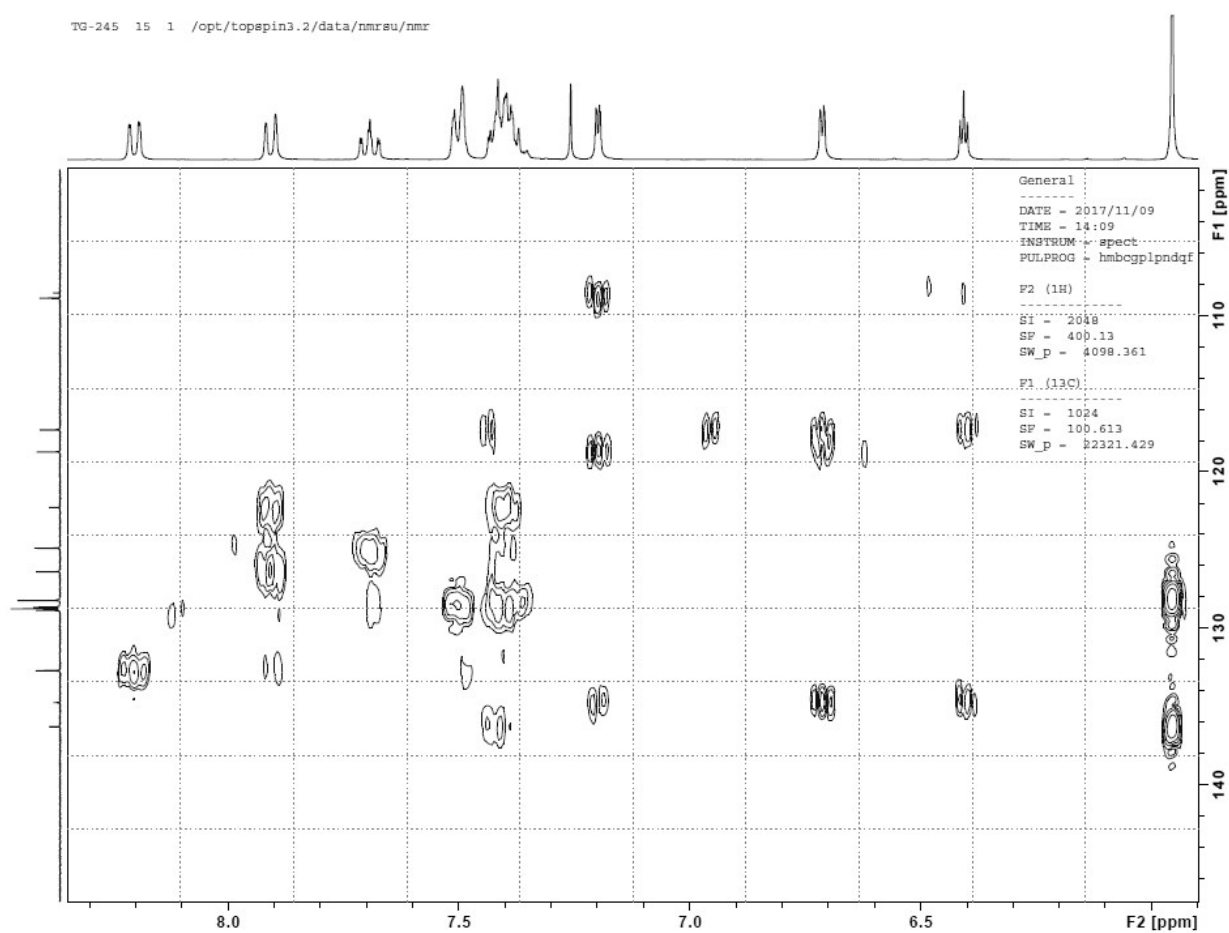

Marinamide **26**

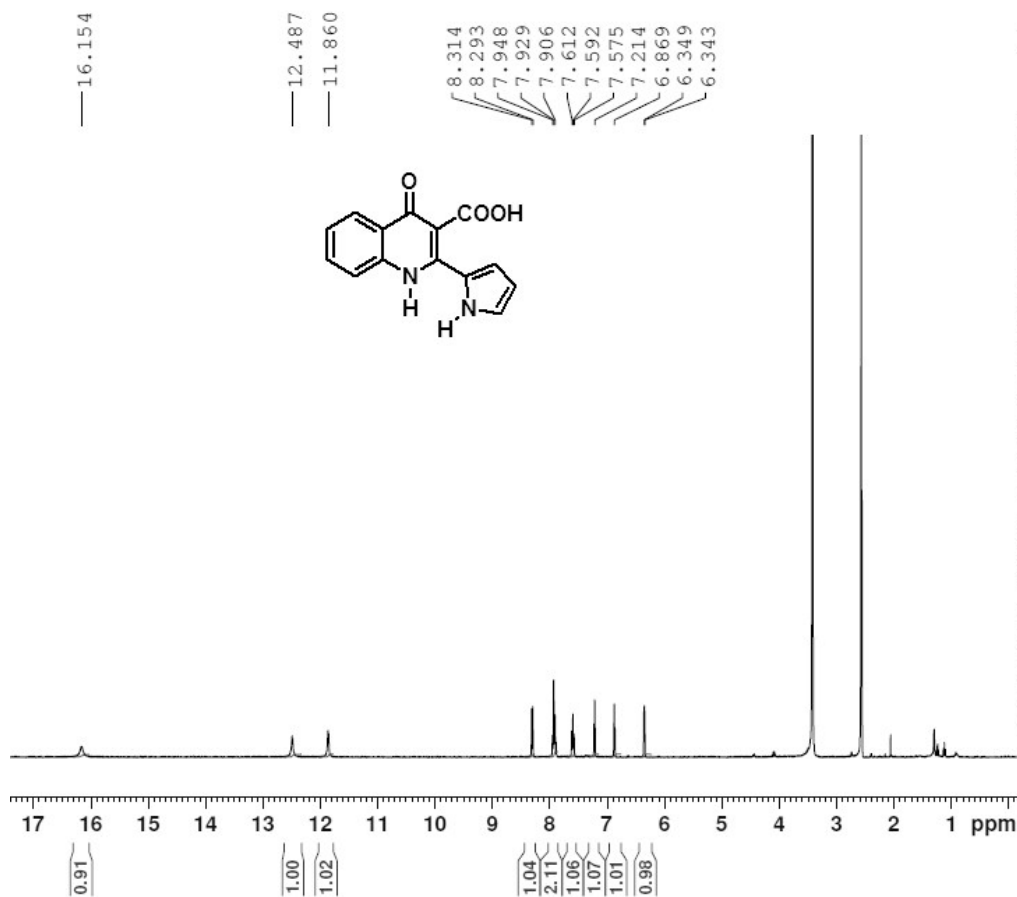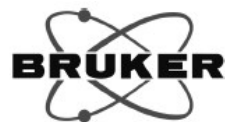

Current Data Parameters  
 NAME TG-MA\_2p  
 EXPNO 10  
 PROCNO 1

F2 - Acquisition Parameters  
 Date\_ 20171205  
 Time 10.38  
 INSTRUM spect  
 PROBHD 5 mm PABBO BB/  
 PULPROG zg30  
 TD 65536  
 SOLVENT DMSO  
 NS 6  
 DS 2  
 SWH 8802.817 Hz  
 FIDRES 0.134320 Hz  
 AQ 3.7224448 sec  
 RG 190.75  
 DW 56.800 usec  
 DE 6.50 usec  
 TE 292.6 K  
 D1 1.00000000 sec  
 TD0 1

===== CHANNEL f1 =====  
 SFO1 400.1336712 MHz  
 NUC1 1H  
 P1 15.00 usec  
 PLW1 13.00000000 W

F2 - Processing parameters  
 SI 65536  
 SF 400.1299773 MHz  
 WDW EM  
 SSB 0  
 LB 0.30 Hz  
 GB 0  
 PC 1.00

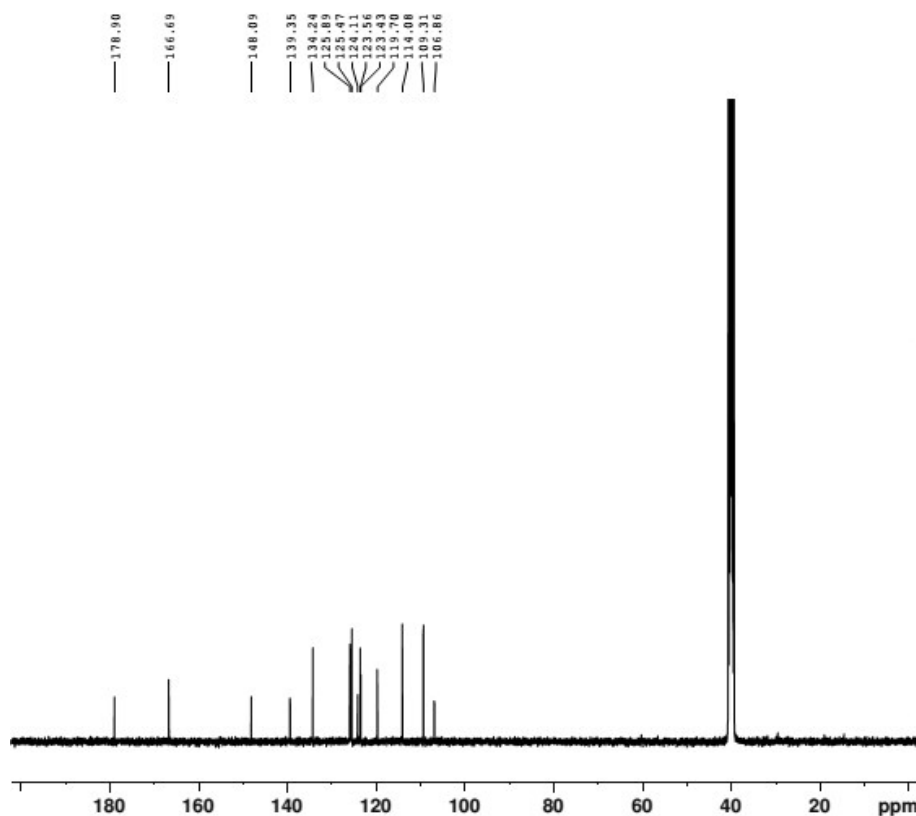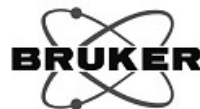

Current Data Parameters  
 NAME TG-MA  
 EXPNO 11  
 PROCNO 1

F2 - Acquisition Parameters  
 Date\_ 20171203  
 Time 3.59  
 INSTRUM spect  
 PROBHD 5 mm PABBO BB/  
 PULPROG zgpg30  
 TD 65536  
 SOLVENT DMSO  
 NS 15000  
 DS 4  
 SWH 24038.461 Hz  
 FIDRES 0.366798 Hz  
 AQ 1.3631488 sec  
 RG 190.75  
 DW 20.800 usec  
 DE 6.50 usec  
 TE 295.8 K  
 D1 2.00000000 sec  
 D11 0.03000000 sec  
 TD0 1

===== CHANNEL f1 =====  
 SFO1 100.6228293 MHz  
 NUC1 13C  
 P1 10.00 usec  
 PLW1 48.00000000 W

===== CHANNEL f2 =====  
 SFO2 400.1316005 MHz  
 NUC2 1H  
 CPDPRG[2] waltz16  
 PCPD2 90.00 usec  
 PLW2 13.00000000 W  
 PLW12 0.3611000 W  
 PLW13 0.29249999 W

F2 - Processing parameters  
 SI 32768  
 SF 100.6127685 MHz  
 WDW EM  
 SSB 0  
 LB 1.00 Hz  
 GB 0  
 PC 1.40
